# Supplementary material for: A distributed residue network permits conformational binding specificity in a conserved family of actin remodelers
Source: eLife. 2021 Dec 2;10:e70601. doi: 10.7554/eLife.70601 (PMC8639148; doi:10.7554/eLife.70601)
Supplement: Figure 1—source data 1. [file elife-70601-fig1-data1.xlsx]

## Sheet: Read Me
Raw data for Figure 1C of A distributed residue network permits conformational binding specificity in a conserved family of actin remodelers
Ena/VASP family EVH1 domains are highly conserved but differ in their affinity for PCARE B
Two separate BLI experiments were performed, and steady state analysis was performed for each curve at a given concentration of EVH1 to obtain values to fit a one-site specific to binding model in Prism to obtain KD's.
Steady state values are reported as the wavelength shift (response, nm) of the BLI experiment.

## Sheet: Figure 1C
	EVL		VASP
Concentration (μM)	Rep 1	Rep 2	Rep 1	Rep 2
80	0.3758	0.3571	0.2989	0.2753
60	0.3453	0.3296	0.263	0.2386
30	0.2641	0.2564	0.1823	0.1699
15	0.1903	0.1868	0.1198	0.1076
7.5	0.1211	0.1204	0.07348	0.06736
3.75	0.06379	0.06696	0.03549	0.03277
1.875	0.03943	0.03721	0.02517	0.02369
0	0	0	0	0
	ENAH
Concentration (μM)	Rep 1	Rep 2
5	0.5149	0.4847
2.5	0.4808	0.452
1.25	0.4243	0.3899
0.625	0.3541	0.3293
0.3125	0.2609	0.2489
0.15625	0.178	0.1785
0.078	0.1147	0.1073
0	0.007257	0.006751
Raw data for Figure 1C: BLI curves for PCARE B binding to ENAH, VASP, and EVL
