# Supplementary material for: A distributed residue network permits conformational binding specificity in a conserved family of actin remodelers
Source: eLife. 2021 Dec 2;10:e70601. doi: 10.7554/eLife.70601 (PMC8639148; doi:10.7554/eLife.70601)
Supplement: Figure 2—source data 1. [file elife-70601-fig2-data1.xlsx]

## Sheet: Read Me
Raw data for Figure 2B, C, E, H, and I of A distributed residue network permits conformational binding specificity in a conserved family of actin remodelers
Figure 2B: Data shown are the enrichment ratio values for ENAH, VASP, or EVL with PCARE B at focal adhesions
Figure 2C: Data shown are normalized fluorescence intensity values as a function of distance (in μm) of mRuby2-tagged PCARE or GFP-tagged Ena/VASP
Figure 2E: Data shown are the enrichment ratio values for ENAH, VASP, or EVL with PCARE B at the mitochondria
Figure 2H: Data shown are raw data for total paxillin area / total cell area for cells for each given condition
Figure 2I: Individual Focal Adhesion area (μm^2) for cells with given conditions

## Sheet: Figure 2B
ENAH	EVL	VASP
0.946005	0.879148	0.966974
1.03099	0.88921	1.08218
0.890372	0.926358	1.08243
1.08934	0.950971	1.0409
1.04156	0.938092	0.981968
0.951226	0.877442	1.03034
0.99527	1.01247	1.03993
1.03217	0.787074	0.934846
1.15447	0.916891	1.01857
1.0247	0.769616	0.95274
1.06514	0.999345	0.927518
1.39588	1.32186	0.970275
1.19439	1.37469	0.964829
1.30898	1.08791	0.915603
1.25279	1.37329	1.0249
1.16599	1.30633	1.01354
1.25015	1.25168	0.932518
1.33041	1.3566	0.974037
1.19297	1.24217	0.944482
1.14386	1.44278	0.956958
1.43093	1.009	0.825722
1.32221	1.01143	0.93565
1.40953	1.01241	0.892052
1.20294	0.996344	1.03322
1.28191	1.09115	0.865755
1.32141	1.0914	0.890651
1.46391	1.05013	0.984278
1.45207	1.01594	1.08992
1.45088	0.929922	0.996113
1.49809	1.02099	0.951814

## Sheet: Figure 2C
Distance (μm)	ENAH GFP	ENAH PCARE	EVL GFP	EVL PCARE	VASP GFP	VASP PCARE
0			0.0586692	0.443182
0.087			0.0682287	0.409091
0.174	0.000669736	0.107046	0.0657919	0.329545	0.013226	0.214022
0.261	0.00267894	0.0731707	0.0483599	0.309091	0.0161012	0.190037
0.347	0.00125576	0.0704607	0.0316776	0.268182	0.0230017	0.129151
0.434	0.00251151	0.096206	0.0275539	0.231818	0.0126509	0.116236
0.521	0.00502302	0.0731707	0.0316776	0.181818	0.0253019	0.107011
0.608	0.00862286	0.0623306	0.0283037	0.190909	0.0143761	0.143911
0.695	0.00652993	0.0501355	0.0230553	0.152273	0.0212766	0.130996
0.782	0.00410213	0.0162602	0.028866	0.184091	0.0333525	0.119926
0.869	0.00460444	0.0596206	0.0269916	0.156818	0.0293272	0.108856
0.955	0.00477187	0.0501355	0.0286785	0.152273	0.0120759	0.105166
1.042	0.00627878	0.0514905	0.0314902	0.147727	0.0155262	0.101476
1.129	0.00309753	0.0528455	0.0283037	0.102273	0.00920069	0.105166
1.216	0.00879029	0.0542005	0.0260544	0.111364	0.0109258	0.095941
1.303	0.00619506	0.0460705	0.0301781	0.115909	0.0172513	0.103321
1.39	0.00929259	0.0514905	0.0277413	0.104545	0.0103508	0.099631
1.477	0.0126413	0.0528455	0.0221181	0.0704545	0.0155262	0.0738007
1.563	0.0226873	0.111111	0.0256795	0.0772727	0.0178263	0.0793358
1.65	0.0251988	0.0894309	0.0211809	0.0613636	0.0103508	0.114391
1.737	0.0192549	0.0731707	0.0176195	0.0545455	0.0172513	0.0848708
1.824	0.0374215	0.113821	0.0193065	0.0590909	0.0281771	0.103321
1.911	0.0374215	0.136856	0.0217432	0.0772727	0.0241518	0.097786
1.998	0.0542486	0.131436	0.0183693	0.0954545	0.0184014	0.121771
2.084	0.0473001	0.117886	0.0221181	0.0863636	0.0247269	0.129151
2.171	0.0524906	0.135501	0.0202437	0.0840909	0.0143761	0.121771
2.258	0.0431143	0.119241	0.0209934	0.104545	0.00747556	0.184502
2.345	0.026622	0.139566	0.0215558	0.0909091	0.0201265	0.234317
2.432	0.0256174	0.111111	0.0178069	0.0977273	0.0235768	0.164207
2.519	0.0296358	0.154472	0.0221181	0.111364	0.0258769	0.149446
2.606	0.0330682	0.146341	0.0129335	0.0840909	0.0247269	0.162362
2.692	0.0330682	0.146341	0.0238051	0.104545	0.0230017	0.186347
2.779	0.0502302	0.172087	0.0236176	0.113636	0.0120759	0.136531
2.866	0.047635	0.178862	0.0206186	0.104545	0.0391029	0.112546
2.953	0.0690666	0.228997	0.0238051	0.109091	0.0333525	0.162362
3.04	0.0683131	0.234417	0.033552	0.129545	0.0437033	0.110701
3.127	0.0805358	0.284553	0.028866	0.138636	0.0506038	0.169742
3.214	0.0953537	0.378049	0.0313027	0.154545	0.0523289	0.138376
3.3	0.0811218	0.330623	0.0453608	0.159091	0.123634	0.210332
3.387	0.0689828	0.348238	0.052671	0.140909	0.115009	0.269373
3.474	0.0689828	0.348238	0.0579194	0.190909	0.113283	0.47048
3.561	0.0685643	0.329268	0.0749766	0.225	0.118459	0.424354
3.648	0.0812892	0.405149	0.107966	0.268182	0.0649799	0.4631
3.735	0.130347	0.410569	0.185942	0.377273	0.0759057	0.501845
3.822	0.146505	0.455285	0.237863	0.425	0.0609546	0.52583
3.908	0.27409	0.547425	0.267854	0.663636	0.066705	0.551661
3.995	0.342738	0.672087	0.274977	0.622727	0.0592294	0.516605
4.082	0.465969	0.758808	0.270853	0.727273	0.0851064	0.54797
4.169	0.778066	1	0.257732	0.795455	0.118459	0.560886
4.256	0.778066	1	0.327648	0.802273	0.234618	0.53321
4.343	0.553118	0.892954	0.406373	0.884091	0.487062	0.505535
4.43	0.457514	0.899729	0.633177	0.877273	0.463485	0.53321
4.516	0.293931	0.680217	0.893721	0.847727	0.221392	0.590406
4.603	0.313102	0.739837	1	0.886364	0.093157	0.660517
4.69	0.381415	0.669377	0.742643	0.913636	0.0851064	0.666052
4.777	0.448807	0.600271	0.503655	0.895455	0.0839563	0.666052
4.864	0.510255	0.646341	0.274602	0.895455	0.0736055	0.658672
4.951	0.513688	0.779133	0.220619	0.872727	0.0747556	0.658672
5.038	0.466471	0.887534	0.287535	0.904545	0.0736055	0.607011
5.124	0.343156	0.634146	0.287535	0.904545	0.0885566	0.616236
5.211	0.262034	0.581301	0.350703	0.897727	0.0770558	0.538745
5.298	0.201088	0.410569	0.294096	0.890909	0.0690052	0.597786
5.385	0.199581	0.439024	0.285473	0.897727	0.0833813	0.592251
5.472	0.24077	0.528455	0.245923	0.863636	0.125934	0.660517
5.559	0.2946	0.54607	0.334021	0.870455	0.12881	0.656827
5.646	0.330096	0.579946	0.56701	0.884091	0.261645	0.651292
5.732	0.534868	0.714092	0.821931	1	0.640598	0.653137
5.819	0.643114	0.785908	0.703655	0.943182	0.788384	0.634686
5.906	0.474424	0.594851	0.420056	0.911364	0.557217	0.682657
5.993	0.430808	0.550136	0.259981	0.934091	0.243243	0.662362
6.08	0.170197	0.340108	0.303468	0.993182	0.153537	0.653137
6.167	0.140393	0.317073	0.347142	0.947727	0.0856814	0.643911
6.253	0.125408	0.275068	0.294658	0.988636	0.0908568	0.588561
6.34	0.121557	0.325203	0.276476	0.915909	0.0977573	0.651292
6.427	0.108916	0.318428	0.422118	0.968182	0.0971823	0.654982
6.514	0.120385	0.364499	0.55239	0.934091	0.079931	0.623616
6.601	0.0987024	0.281843	0.477976	0.934091	0.0816561	0.653137
6.688	0.0795312	0.239837	0.277413	0.890909	0.0540541	0.642066
6.775	0.0795312	0.239837	0.150703	0.922727	0.115584	0.675277
6.861	0.061532	0.191057	0.136457	0.902273	0.220817	0.640221
6.948	0.0803684	0.265583	0.122399	0.879545	0.457159	0.682657
7.035	0.0946003	0.271003	0.12671	0.765909	1	0.697417
7.122	0.10406	0.292683	0.11284	0.659091	0.93732	0.706642
7.209	0.136542	0.327913	0.138332	0.709091	0.434733	0.712177
7.296	0.161909	0.318428	0.200937	0.7	0.162162	0.649446
7.383	0.131938	0.341463	0.297282	0.713636	0.0943071	0.605166
7.469	0.130096	0.348238	0.277038	0.754545	0.0822312	0.581181
7.556	0.130096	0.348238	0.204873	0.681818	0.0948821	0.590406
7.643	0.134115	0.379404	0.2	0.745455	0.0776308	0.584871
7.73	0.146086	0.399729	0.218932	0.727273	0.0810811	0.599631
7.817	0.27409	0.399729	0.254545	0.775	0.0954572	0.702952
7.904	0.375052	0.391599	0.350515	0.761364	0.104658	0.710332
7.991	0.322562	0.376694	0.553515	0.8	0.102358	0.680812
8.077	0.236752	0.350949	0.557263	0.802273	0.13686	0.710332
8.164	0.289577	0.308943	0.560637	0.763636	0.129385	0.738007
8.251	0.569192	0.5	0.631865	0.834091	0.186314	0.760148
8.338	0.569192	0.5	0.644986	0.881818	0.316274	0.723247
8.425	0.891	0.574526	0.594189	0.722727	0.524439	1
8.512	1	0.711382	0.522587	0.690909	0.521564	0.928044
8.599	0.919715	0.533875	0.40806	0.627273	0.281196	0.797048
8.685	0.578736	0.482385	0.21612	0.575	0.20529	0.804428
8.772	0.327836	0.371274	0.120525	0.570455	0.124784	0.690037
8.859	0.317957	0.52439	0.094283	0.522727	0.138585	0.645756
8.946	0.46396	0.692412	0.0924086	0.447727	0.147786	0.616236
9.033	0.598493	0.799458	0.125773	0.534091	0.193214	0.571956
9.12	0.670825	0.794038	0.0837863	0.461364	0.221392	0.623616
9.207	0.456676	0.639566	0.0629803	0.404545	0.248994	0.618081
9.293	0.318292	0.445799	0.0464855	0.372727	0.39908	0.612546
9.38	0.133696	0.298103	0.0466729	0.395455	0.689477	0.647601
9.467	0.126664	0.307588	0.0442362	0.338636	0.60092	0.773063
9.554	0.134198	0.284553	0.0489222	0.384091	0.426107	0.708487
9.641	0.127082	0.329268	0.0494845	0.327273	0.511213	0.619926
9.728	0.133194	0.421409	0.0541706	0.365909	0.655549	0.5369
9.814	0.0944328	0.307588	0.0348641	0.368182	0.469235	0.383764
9.901	0.0835496	0.257453	0.0324274	0.322727	0.201265	0.269373
9.988	0.0699037	0.264228	0.0303655	0.293182	0.146061	0.191882
10.075	0.0640435	0.273713	0.028866	0.293182	0.106958	0.164207
10.162	0.0641272	0.266938	0.0249297	0.261364	0.0753306	0.143911
10.249	0.0850565	0.273713	0.0249297	0.261364	0.0649799	0.173432
10.336	0.102219	0.260163	0.039925	0.268182	0.0724554	0.166052
10.422	0.141984	0.302168	0.0489222	0.256818	0.0592294	0.134686
10.509	0.183843	0.331978	0.0791003	0.245455	0.053479	0.125461
10.596	0.279196	0.344173	0.106092	0.225	0.0373778	0.0645756
10.683	0.554542	0.436314	0.125961	0.227273	0.0448534	0.0940959
10.77	0.750523	0.514905	0.070478	0.131818	0.0391029	0.0922509
10.857	0.750523	0.514905	0.0307404	0.102273	0.0391029	0.0793358
10.944	0.479866	0.428184	0.00937207	0.0681818	0.0287522	0.0774908
11.03	0.203935	0.353659	0.00937207	0.0613636	0.0419781	0.0424354
11.117	0.104311	0.302168	0.0166823	0.0931818	0.0483036	0.0701107
11.204	0.078694	0.257453	0.00749766	0.0545455	0.0345026	0.0904059
11.291	0.0834659	0.223577	0.011059	0.0818182	0.0408281	0.0940959
11.378	0.0651319	0.180217	0.0076851	0.0590909	0.0310523	0.099631
11.465	0.0627878	0.177507	0.00299906	0.0522727	0.0506038	0.0682657
11.552	0.0620343	0.130081	0.0054358	0.0545455	0.0155262	0.0682657
11.638	0.0620343	0.130081	0.0076851	0.0795455	0.0304773	0.0221402
11.725	0.0566764	0.105691	0.00337395	0.0568182	0.0287522	0.0645756
11.812	0.0363332	0.109756	0.00412371	0.0704545	0.0304773	0.099631
11.899	0.027208	0.108401	0.00524836	0.0454545	0.0276021	0.118081
11.986	0.0209293	0.0853659	0.00843486	0.0522727	0.0310523	0.138376
12.073	0.0190875	0.0542005	0.00487348	0.0477273	0.0241518	0.123616
12.16	0.0119715	0.0474255	0.00412371	0.05	0.026452	0.121771
12.246	0.0124738	0.0636856	0.00524836	0.0886364	0.0224267	0.116236
12.333	0.00778568	0.0284553	0.00337395	0.0704545	0.0293272	0.0738007
12.42	0.00778568	0.0284553	0.00674789	0.0363636	0.00920069	0.105166
12.507	0.00569276	0.0216802	0.00299906	0.00681818	0.0126509	0.127306
12.594	0.00661365	0.0230352	0.0022493	0.0386364	0.0345026	0.0922509
12.681	0.00569276	0.0216802	0.00206186	0.0272727	0.0287522	0.0867159
12.768	0.00326496	0.0379404	0.00506092	0.0227273	0.0149511	0.0885609
12.854	0.00301381	0.0528455	0.00524836	0.0204545	0.0184014	0.130996
12.941	0.00267894	0.0230352	0.00337395	0.0363636	0.0304773	0.140221
13.028	0.00334868	0.0176152	0.00281162	0.0409091	0.0212766	0.0867159
13.115	0.00301381	0.0243902	0.00431115	0.0340909	0.0304773	0.0793358
13.202	0.00284638	0.0257453	0.00468604	0.0227273	0.0224267	0.0848708
13.289	0.00234408	0.0176152	0.00206186	0.0386364	0.0299022	0.108856
13.376	0.0010046	0.0121951	0.00393627	0.0136364	0.0143761	0.0904059
13.462	0.00242779	0.0149051	0.00693533	0.0363636	0.0253019	0.097786
13.549	0.00326496	0.0094851	0.00168697	0.00454546	0.0149511	0.107011
13.636	0.00175806	0.00406504	0.00149953	0	0.0322024	0.103321
13.723	8.3717e-05	0	0.00374883	0.0431818	0.0247269	0.0774908
13.81	0.00318125	0.0176152	0.00131209	0.0159091	0.00977573	0.0940959
13.897	0	0.0108401	0.00374883	0.0386364	0.0195515	0.0830258
13.983	0.000753453	0.00271003	0.00412371	0.025	0.0161012	0.0369004
14.07	0.00209293	0.0189702	0.00337395	0.025	0.0189764	0.108856
14.157	0.00175806	0.0162602	0.00337395	0.0431818	0.0333525	0.103321
14.244	0.00159062	0.00813008	0.00299906	0.025	0.0224267	0.0830258
14.331	0.000167434	0.0135501	0	0.025	0	0
14.418	0.000167434	0.00271003	0.00431115	0.0727273	0.0247269	0.118081
14.505	8.3717e-05	0.0189702	0.00374883	0.0613636	0.0276021	0.0922509
14.591	0.000334868	0.00677507	0.00337395	0.0727273	0.027027	0.0627306
14.678	0.00117204	0.00677507	0.000749766	0.0590909	0.0195515	0.0590406
14.765	0.00125576	0.0108401	0.0022493	0.0704545	0.0184014	0.0793358
14.852			0.00149953	0.0613636
14.939			0.00393627	0.0431818

## Sheet: Figure 2E
ENAH	EVL	VASP
1.15566	1.1225	0.909005
1.06728	1.26305	1.14049
1.09286	1.04912	0.948855
1.09218	1.16546	0.98038
1.07524	0.941812	0.97601
1.10622	1.08189	0.939474
1.0748	1.12425	0.974595
1.06377	0.972901	0.933767
1.05022	0.91976	0.952361
1.01377	0.880958	0.981201
1.51023	1.00665	1.01167
1.36275	0.948735	1.02021
1.44792	1.12207	1.0343
1.35181	0.950267	1.02629
1.46724	1.09965	1.02033
1.28656	1.12702	1.03448
1.34683	1.08499	1.0464
1.32932	1.052	1.04502
1.39933	1.02509	1.03011
1.30948	0.957996	1.01805
1.3877	1.15782	1.05308
1.30214	0.901303	1.03265
1.40543	0.942771	1.05158
1.49561	1.54102	1.00711
1.47041	0.717171	1.07847
1.44856	1.01095	1.06377
1.31675	0.938284	1.08762
1.9054	1.01579	1.0558
1.64673	1.20258	1.06455
1.565	1.04664	1.0654

## Sheet: Figure 2H
LKO	shENAH	PCARE	Mito-PCARE
0.048271	0.015184	0.023934	0.038321
0.026023	0.010588	0.019282	0.038589
0.024778	0.012306	0.035277	0.024244
0.085231	0.029411	0.021918	0.017934
0.023292	0.023549	0.034297	0.019332
0.037851	0.013463	0.036126	0.032415
0.022157	0.003501	0.025266	0.0385
0.016844	0.013254	0.070994	0.01877
0.055945	0.003418	0.016761	0.013289
0.017912	0.015843	0.024615	0.024885
0.087126	0.012409	0.014	0.029488
0.018343	0.014184	0.023216	0.022996
0.060179	0.014096	0.020678	0.05599
0.05391	0.009275	0.020166	0.024717
0.018127	0.016407	0.029535	0.03167
0.102739	0.009793	0.022788	0.025857
0.028814	0.009514	0.014603	0.043452
0.029754	0.036449	0.024641	0.015664
0.024766	0.02996	0.02574	0.017761
0.026009	0.024138	0.01957	0.063472
0.077574	0.012239	0.015244	0.031849
0.037764	0.012936	0.019467	0.016719
0.0287	0.01139	0.022507	0.032839
0.093857	0.01873	0.044111	0.034364
0.087289	0.020072	0.027927	0.018468
0.053601	0.013951	0.040202	0.032368
0.024688	0.01139	0.020323	0.031426
0.050634	0.008533	0.037144	0.035585
0.058881	0.021439	0.040738	0.030829
0.033196	0.031104	0.018395	0.034815
0.025847	0.052544	0.058993	0.024373
0.075211	0.090377	0.026668	0.03067
0.109576	0.04874	0.032072	0.033737
0.053012	0.067769	0.021077	0.065735
0.105039	0.052566	0.055661	0.063727
0.066075	0.049418	0.051361	0.047867
0.053369	0.070419	0.040162	0.059055
0.031417	0.039586	0.035335	0.020239
0.049712	0.029242	0.040693	0.02828
0.037272	0.052398	0.104561	0.038557
0.050276	0.020006	0.067862	0.050594
0.082364	0.039322	0.040433	0.064075
0.069622	0.061711	0.051554	0.058695
0.071197	0.055704	0.026226	0.032017
0.067884	0.057919	0.068539	0.055032
		0.059354
		0.037546
		0.042994
		0.046563

## Sheet: Figure 2I
LKO	shENAH	PCARE	Mito-PCARE
0.25	0.25	0.25	0.25
0.25	0.25	0.25	0.25
0.25	0.25	0.25	0.25
0.25	0.25	0.25	0.25
0.25	0.25	0.25	0.25
0.25	0.25	0.25	0.25
0.25	0.25	0.25	0.25
0.25	0.25	0.25	0.25
0.25	0.25	0.25	0.25
0.25	0.25	0.25	0.25
0.25	0.25	0.25	0.25
0.25	0.25	0.25	0.25
0.2504	0.25	0.25	0.25
0.2504	0.25	0.25	0.25
0.2504	0.25	0.25	0.25
0.2504	0.25	0.25	0.25
0.2504	0.25	0.25	0.25
0.2504	0.25	0.25	0.25
0.2504	0.25	0.25	0.25
0.2504	0.25	0.25	0.25
0.2504	0.25	0.25	0.25
0.2504	0.25	0.25	0.25
0.2545	0.25	0.25	0.25
0.2545	0.2504	0.25	0.25
0.2545	0.2504	0.25	0.25
0.2545	0.2504	0.25	0.25
0.2545	0.2504	0.25	0.25
0.2545	0.2504	0.25	0.25
0.2545	0.2504	0.25	0.25
0.2545	0.2504	0.25	0.25
0.2545	0.2504	0.25	0.25
0.2545	0.2504	0.25	0.25
0.2545	0.2504	0.25	0.25
0.2545	0.2504	0.25	0.25
0.2545	0.2504	0.25	0.2504
0.2545	0.2504	0.25	0.2504
0.2586	0.2504	0.25	0.2504
0.2586	0.2504	0.25	0.2504
0.2586	0.2504	0.25	0.2504
0.2586	0.2504	0.25	0.2504
0.2586	0.2504	0.25	0.2545
0.2586	0.2504	0.25	0.2545
0.2586	0.2504	0.25	0.2545
0.2586	0.2504	0.2504	0.2545
0.2586	0.2504	0.2504	0.2545
0.26	0.2545	0.2504	0.2586
0.26	0.2545	0.2504	0.2586
0.26	0.2545	0.2504	0.2586
0.26	0.2545	0.2504	0.2586
0.26	0.2545	0.2504	0.2586
0.26	0.2545	0.2504	0.2586
0.2627	0.2545	0.2504	0.2586
0.2627	0.2545	0.2504	0.26
0.2627	0.2545	0.2545	0.26
0.2627	0.2545	0.2545	0.26
0.2627	0.2545	0.2545	0.26
0.2627	0.2545	0.2545	0.26
0.2627	0.2545	0.2545	0.26
0.2627	0.2545	0.2545	0.26
0.2668	0.2545	0.2586	0.26
0.2668	0.2545	0.2586	0.26
0.2668	0.2545	0.26	0.26
0.2668	0.2545	0.26	0.26
0.2668	0.2545	0.26	0.26
0.2668	0.2545	0.26	0.26
0.2668	0.2545	0.26	0.26
0.2668	0.2586	0.26	0.26
0.2668	0.2586	0.26	0.26
0.2668	0.2586	0.26	0.26
0.2668	0.2586	0.26	0.26
0.2668	0.2586	0.26	0.26
0.2668	0.2586	0.26	0.26
0.2668	0.2586	0.26	0.26
0.2668	0.2586	0.26	0.26
0.2668	0.2586	0.26	0.26
0.27	0.2586	0.26	0.2627
0.27	0.2586	0.26	0.2627
0.27	0.2586	0.26	0.2627
0.27	0.2586	0.26	0.2627
0.2709	0.2586	0.26	0.2668
0.2709	0.2586	0.26	0.2668
0.2709	0.26	0.2627	0.2668
0.2709	0.26	0.2627	0.2668
0.2709	0.26	0.2627	0.27
0.2709	0.26	0.2627	0.27
0.275	0.26	0.2627	0.27
0.275	0.26	0.2627	0.27
0.275	0.26	0.2627	0.27
0.275	0.26	0.2627	0.27
0.275	0.26	0.2627	0.27
0.275	0.26	0.2627	0.27
0.275	0.26	0.2627	0.27
0.275	0.26	0.2627	0.27
0.275	0.26	0.2627	0.27
0.275	0.26	0.2627	0.27
0.275	0.26	0.2627	0.27
0.275	0.2627	0.2668	0.27
0.2791	0.2627	0.2668	0.27
0.2791	0.2627	0.2668	0.27
0.2791	0.2627	0.2668	0.27
0.2791	0.2627	0.2668	0.27
0.2791	0.2627	0.2668	0.27
0.2791	0.2627	0.27	0.27
0.2791	0.2627	0.27	0.2709
0.2791	0.2627	0.27	0.2709
0.2791	0.2627	0.27	0.2709
0.2791	0.2627	0.27	0.2709
0.2791	0.2627	0.27	0.275
0.28	0.2627	0.27	0.275
0.28	0.2627	0.27	0.2791
0.28	0.2627	0.27	0.2791
0.28	0.2627	0.27	0.28
0.28	0.2668	0.27	0.28
0.28	0.2668	0.27	0.28
0.28	0.2668	0.27	0.28
0.28	0.2668	0.27	0.28
0.2833	0.2668	0.27	0.28
0.2833	0.2668	0.27	0.28
0.2833	0.2668	0.27	0.28
0.2833	0.2668	0.27	0.28
0.2833	0.2668	0.27	0.28
0.2833	0.2668	0.27	0.28
0.2833	0.2668	0.2709	0.28
0.2833	0.2668	0.2709	0.28
0.2833	0.2668	0.2709	0.28
0.2874	0.2668	0.2709	0.28
0.2874	0.2668	0.2709	0.28
0.2874	0.2668	0.2709	0.28
0.2874	0.2668	0.2709	0.28
0.2874	0.2668	0.2709	0.28
0.2874	0.2668	0.275	0.28
0.2874	0.2668	0.275	0.28
0.29	0.2668	0.275	0.28
0.29	0.2668	0.275	0.28
0.2915	0.2668	0.275	0.28
0.2915	0.27	0.275	0.28
0.2915	0.27	0.2791	0.28
0.2915	0.27	0.2791	0.28
0.2915	0.27	0.28	0.28
0.2915	0.27	0.28	0.2874
0.2915	0.27	0.28	0.2874
0.2915	0.2709	0.28	0.29
0.2915	0.2709	0.28	0.29
0.2915	0.2709	0.28	0.29
0.2915	0.2709	0.28	0.29
0.2956	0.2709	0.28	0.29
0.2956	0.2709	0.28	0.29
0.2956	0.2709	0.28	0.29
0.2956	0.2709	0.28	0.29
0.2956	0.2709	0.28	0.29
0.2956	0.2709	0.28	0.29
0.2956	0.2709	0.28	0.29
0.2997	0.2709	0.28	0.29
0.2997	0.2709	0.28	0.29
0.2997	0.275	0.28	0.29
0.2997	0.275	0.28	0.29
0.2997	0.275	0.28	0.29
0.2997	0.275	0.28	0.29
0.2997	0.275	0.28	0.29
0.2997	0.275	0.28	0.29
0.3	0.275	0.28	0.2915
0.3	0.275	0.28	0.2915
0.3	0.275	0.28	0.2915
0.3	0.275	0.28	0.2915
0.3	0.275	0.28	0.2956
0.3	0.275	0.28	0.2956
0.3	0.275	0.28	0.2956
0.3	0.275	0.2833	0.2997
0.3038	0.275	0.2833	0.2997
0.3038	0.275	0.2833	0.2997
0.3038	0.2791	0.2833	0.3
0.3038	0.2791	0.2874	0.3
0.3038	0.2791	0.2874	0.3
0.3038	0.2791	0.2874	0.3
0.3079	0.2791	0.2874	0.3
0.3079	0.2791	0.2874	0.3
0.3079	0.2791	0.29	0.3
0.3079	0.2791	0.29	0.3
0.3079	0.2791	0.29	0.3
0.3079	0.2791	0.29	0.3
0.31	0.2791	0.29	0.3
0.31	0.28	0.29	0.3
0.31	0.28	0.29	0.3
0.31	0.28	0.29	0.3
0.31	0.28	0.29	0.3
0.31	0.28	0.29	0.3
0.312	0.28	0.29	0.3
0.312	0.28	0.29	0.3
0.312	0.28	0.29	0.3
0.312	0.28	0.29	0.3
0.3161	0.28	0.29	0.3
0.3161	0.28	0.29	0.3
0.3161	0.2833	0.29	0.3
0.3161	0.2833	0.29	0.3038
0.3161	0.2833	0.29	0.3038
0.3161	0.2833	0.29	0.3038
0.3161	0.2833	0.29	0.3038
0.32	0.2833	0.29	0.3038
0.32	0.2833	0.2915	0.3079
0.32	0.2833	0.2915	0.3079
0.32	0.2833	0.2915	0.3079
0.32	0.2833	0.2915	0.3079
0.32	0.2833	0.2915	0.3079
0.3202	0.2833	0.2915	0.31
0.3202	0.2833	0.2915	0.31
0.3202	0.2874	0.2956	0.31
0.3202	0.2874	0.2956	0.31
0.3202	0.2874	0.2956	0.31
0.3202	0.2874	0.2956	0.31
0.3202	0.2874	0.2956	0.31
0.3202	0.2874	0.2956	0.31
0.3202	0.2874	0.2997	0.31
0.3202	0.2874	0.2997	0.31
0.3243	0.2874	0.3	0.31
0.3243	0.2874	0.3	0.31
0.3243	0.2874	0.3	0.31
0.3243	0.2874	0.3	0.31
0.3243	0.2874	0.3	0.31
0.3243	0.2874	0.3	0.312
0.3243	0.2874	0.3	0.312
0.3243	0.2874	0.3	0.312
0.3243	0.2874	0.3	0.3161
0.3284	0.29	0.3	0.3161
0.3284	0.29	0.3	0.3161
0.3284	0.29	0.3	0.32
0.3284	0.29	0.3	0.32
0.3284	0.29	0.3	0.32
0.3284	0.2915	0.3	0.32
0.33	0.2915	0.3	0.32
0.33	0.2915	0.3	0.32
0.33	0.2915	0.3	0.32
0.33	0.2915	0.3	0.32
0.33	0.2915	0.3	0.32
0.33	0.2915	0.3	0.32
0.33	0.2915	0.3	0.32
0.3325	0.2915	0.3	0.32
0.3325	0.2915	0.3	0.32
0.3325	0.2915	0.3038	0.32
0.3325	0.2915	0.3038	0.32
0.3325	0.2915	0.3038	0.32
0.3325	0.2956	0.3038	0.32
0.3325	0.2956	0.3079	0.32
0.3325	0.2956	0.3079	0.32
0.3325	0.2956	0.31	0.32
0.3325	0.2956	0.31	0.32
0.3366	0.2956	0.31	0.32
0.3366	0.2956	0.31	0.32
0.3366	0.2956	0.31	0.32
0.3366	0.2956	0.31	0.32
0.3366	0.2956	0.31	0.32
0.3366	0.2956	0.31	0.32
0.3366	0.2956	0.31	0.32
0.34	0.2956	0.31	0.3202
0.34	0.2956	0.31	0.3202
0.34	0.2956	0.31	0.3202
0.3407	0.2997	0.31	0.3202
0.3407	0.2997	0.31	0.3243
0.3407	0.2997	0.31	0.3243
0.3407	0.2997	0.312	0.3243
0.3407	0.2997	0.312	0.3284
0.3407	0.2997	0.312	0.3284
0.3407	0.2997	0.312	0.3284
0.3407	0.2997	0.3161	0.3284
0.3407	0.2997	0.3161	0.33
0.3407	0.2997	0.3161	0.33
0.3407	0.3	0.3161	0.33
0.3448	0.3	0.32	0.33
0.3448	0.3	0.32	0.33
0.3448	0.3	0.32	0.33
0.3448	0.3	0.32	0.33
0.3448	0.3	0.32	0.33
0.3448	0.3	0.32	0.33
0.3489	0.3	0.32	0.33
0.3489	0.3	0.32	0.33
0.3489	0.3	0.32	0.33
0.3489	0.3038	0.32	0.3366
0.3489	0.3038	0.32	0.3366
0.3489	0.3038	0.32	0.3366
0.3489	0.3038	0.32	0.3366
0.3489	0.3038	0.32	0.3366
0.3489	0.3038	0.32	0.34
0.3489	0.3038	0.32	0.34
0.3489	0.3038	0.32	0.34
0.3489	0.3038	0.32	0.34
0.3489	0.3038	0.32	0.34
0.3489	0.3038	0.3202	0.34
0.35	0.3038	0.3202	0.34
0.35	0.3038	0.3202	0.34
0.35	0.3038	0.3243	0.34
0.35	0.3038	0.3284	0.34
0.35	0.3079	0.3284	0.34
0.35	0.3079	0.3284	0.34
0.35	0.3079	0.33	0.34
0.35	0.3079	0.33	0.34
0.35	0.3079	0.33	0.34
0.353	0.3079	0.33	0.34
0.353	0.31	0.33	0.34
0.353	0.31	0.33	0.34
0.353	0.31	0.33	0.34
0.353	0.31	0.33	0.34
0.353	0.31	0.33	0.34
0.3571	0.31	0.33	0.3407
0.3571	0.31	0.33	0.3407
0.3571	0.31	0.33	0.3407
0.3571	0.31	0.33	0.3448
0.3571	0.31	0.33	0.3448
0.36	0.31	0.33	0.3448
0.36	0.31	0.33	0.3448
0.36	0.31	0.33	0.3448
0.36	0.31	0.3325	0.3489
0.3612	0.31	0.3325	0.3489
0.3612	0.312	0.3325	0.35
0.3612	0.312	0.3325	0.35
0.3612	0.312	0.3325	0.35
0.3612	0.312	0.3366	0.35
0.3612	0.312	0.3366	0.35
0.3612	0.312	0.3366	0.35
0.3612	0.312	0.34	0.35
0.3612	0.312	0.34	0.35
0.3612	0.312	0.34	0.35
0.3654	0.312	0.34	0.35
0.3654	0.312	0.34	0.353
0.3654	0.312	0.34	0.3571
0.3654	0.312	0.34	0.3571
0.3695	0.312	0.34	0.36
0.3695	0.312	0.34	0.36
0.3695	0.312	0.34	0.36
0.37	0.3161	0.34	0.36
0.37	0.3161	0.34	0.36
0.37	0.3161	0.34	0.36
0.37	0.3161	0.34	0.36
0.37	0.3161	0.34	0.36
0.37	0.3161	0.34	0.36
0.37	0.3161	0.34	0.36
0.37	0.3161	0.3407	0.36
0.37	0.3161	0.3407	0.36
0.37	0.3161	0.3448	0.36
0.37	0.3161	0.3448	0.36
0.37	0.3161	0.3489	0.36
0.37	0.3161	0.35	0.36
0.37	0.3161	0.35	0.36
0.3736	0.3161	0.35	0.36
0.3736	0.32	0.35	0.36
0.3736	0.32	0.35	0.36
0.3736	0.32	0.35	0.3612
0.3736	0.32	0.35	0.3612
0.3777	0.32	0.35	0.3612
0.3777	0.32	0.35	0.3654
0.3777	0.32	0.35	0.3654
0.3777	0.32	0.35	0.3695
0.3777	0.32	0.353	0.3695
0.3777	0.32	0.353	0.3695
0.3777	0.32	0.3571	0.37
0.38	0.32	0.3571	0.37
0.38	0.32	0.3571	0.37
0.38	0.32	0.3571	0.37
0.38	0.32	0.3571	0.37
0.38	0.32	0.36	0.37
0.3818	0.32	0.36	0.37
0.3818	0.32	0.36	0.37
0.3818	0.3202	0.36	0.37
0.3818	0.3202	0.36	0.37
0.3818	0.3202	0.36	0.37
0.3818	0.3202	0.36	0.37
0.3818	0.3202	0.36	0.37
0.3859	0.3202	0.36	0.37
0.3859	0.3202	0.36	0.37
0.3859	0.3202	0.36	0.37
0.3859	0.3202	0.36	0.37
0.3859	0.3202	0.3612	0.37
0.3859	0.3202	0.3612	0.37
0.3859	0.3202	0.3612	0.37
0.39	0.3202	0.3654	0.37
0.39	0.3202	0.3654	0.3736
0.39	0.3202	0.3654	0.3736
0.39	0.3243	0.3654	0.3736
0.39	0.3243	0.3654	0.3736
0.39	0.3243	0.3695	0.3777
0.39	0.3243	0.3695	0.3777
0.39	0.3243	0.3695	0.38
0.39	0.3243	0.3695	0.38
0.39	0.3243	0.37	0.38
0.3941	0.3243	0.37	0.38
0.3941	0.3243	0.37	0.38
0.3941	0.3243	0.37	0.38
0.3941	0.3243	0.37	0.38
0.3941	0.3243	0.37	0.38
0.3941	0.3243	0.37	0.38
0.3941	0.3243	0.37	0.38
0.3982	0.3243	0.37	0.38
0.3982	0.3243	0.37	0.38
0.3982	0.3284	0.37	0.38
0.3982	0.3284	0.37	0.38
0.3982	0.3284	0.37	0.38
0.3982	0.3284	0.37	0.38
0.3982	0.3284	0.37	0.38
0.3982	0.3284	0.37	0.3818
0.3982	0.3284	0.37	0.3818
0.3982	0.3284	0.3736	0.3859
0.3982	0.3284	0.3736	0.3859
0.3982	0.3284	0.3777	0.3859
0.3982	0.3284	0.38	0.39
0.4	0.33	0.38	0.39
0.4	0.33	0.38	0.39
0.4	0.33	0.38	0.39
0.4	0.33	0.38	0.39
0.4	0.33	0.38	0.39
0.4	0.33	0.38	0.39
0.4	0.33	0.38	0.39
0.4023	0.33	0.38	0.39
0.4023	0.33	0.3818	0.39
0.4023	0.3325	0.3818	0.39
0.4023	0.3325	0.3818	0.39
0.4023	0.3325	0.3859	0.39
0.4064	0.3325	0.3859	0.39
0.4064	0.3325	0.3859	0.39
0.4064	0.3325	0.3859	0.39
0.4064	0.3325	0.39	0.39
0.4064	0.3325	0.39	0.39
0.41	0.3325	0.39	0.39
0.41	0.3325	0.39	0.39
0.41	0.3325	0.39	0.39
0.41	0.3325	0.39	0.39
0.41	0.3366	0.39	0.39
0.41	0.3366	0.39	0.39
0.4105	0.3366	0.39	0.39
0.4105	0.3366	0.39	0.39
0.4105	0.3366	0.39	0.39
0.4105	0.3366	0.39	0.39
0.4105	0.3366	0.39	0.39
0.4105	0.3366	0.39	0.39
0.4105	0.3366	0.39	0.39
0.4105	0.3366	0.39	0.39
0.4146	0.3366	0.3941	0.39
0.4146	0.3366	0.3941	0.3941
0.4146	0.34	0.3941	0.3941
0.4146	0.34	0.4	0.3941
0.4146	0.34	0.4	0.3941
0.4187	0.34	0.4	0.3982
0.4187	0.34	0.4	0.3982
0.4187	0.34	0.4	0.3982
0.4187	0.34	0.4	0.4
0.4187	0.34	0.4	0.4
0.4187	0.34	0.4	0.4
0.42	0.34	0.4	0.4
0.42	0.34	0.4	0.4
0.42	0.34	0.4	0.4
0.42	0.34	0.4	0.4
0.42	0.34	0.4	0.4
0.42	0.3407	0.4	0.4
0.4228	0.3407	0.4	0.4
0.4228	0.3407	0.4	0.4
0.4228	0.3407	0.4	0.4
0.4228	0.3407	0.4	0.4
0.4269	0.3407	0.4	0.4
0.4269	0.3407	0.4023	0.4023
0.4269	0.3407	0.4023	0.4023
0.4269	0.3407	0.4064	0.4064
0.4269	0.3407	0.41	0.4064
0.43	0.3448	0.41	0.4064
0.43	0.3448	0.41	0.4064
0.43	0.3448	0.41	0.41
0.43	0.3448	0.41	0.41
0.43	0.3448	0.41	0.41
0.43	0.3448	0.41	0.41
0.43	0.3448	0.41	0.41
0.431	0.3489	0.41	0.41
0.431	0.3489	0.41	0.41
0.431	0.3489	0.41	0.41
0.431	0.3489	0.41	0.41
0.4351	0.3489	0.4105	0.41
0.4351	0.3489	0.4105	0.41
0.4351	0.3489	0.4146	0.41
0.4351	0.35	0.4146	0.41
0.4351	0.35	0.4146	0.41
0.4351	0.35	0.4187	0.41
0.4392	0.35	0.4187	0.41
0.4392	0.35	0.4187	0.41
0.4392	0.35	0.4187	0.41
0.4392	0.35	0.42	0.41
0.4392	0.353	0.42	0.41
0.44	0.353	0.42	0.41
0.44	0.353	0.42	0.41
0.44	0.353	0.42	0.41
0.44	0.353	0.42	0.41
0.44	0.353	0.42	0.41
0.44	0.353	0.42	0.4105
0.44	0.353	0.42	0.4146
0.44	0.353	0.42	0.4187
0.44	0.353	0.4228	0.42
0.44	0.353	0.4228	0.42
0.4433	0.353	0.4228	0.42
0.4433	0.353	0.43	0.42
0.4433	0.3571	0.43	0.42
0.4475	0.3571	0.43	0.42
0.4475	0.3571	0.43	0.42
0.4475	0.3571	0.43	0.42
0.4475	0.3571	0.43	0.42
0.45	0.36	0.43	0.42
0.45	0.36	0.43	0.42
0.4516	0.36	0.43	0.4269
0.4516	0.36	0.43	0.4269
0.4516	0.36	0.43	0.43
0.4516	0.36	0.43	0.43
0.4516	0.36	0.43	0.43
0.4557	0.36	0.43	0.43
0.4557	0.3612	0.43	0.43
0.4557	0.3612	0.43	0.43
0.4557	0.3612	0.43	0.43
0.4598	0.3612	0.431	0.43
0.4598	0.3612	0.4351	0.43
0.4598	0.3612	0.4351	0.43
0.4598	0.3612	0.4351	0.43
0.4598	0.3612	0.4392	0.43
0.46	0.3654	0.4392	0.43
0.46	0.3654	0.4392	0.43
0.46	0.3654	0.44	0.431
0.46	0.3654	0.44	0.431
0.46	0.3654	0.44	0.4351
0.46	0.3654	0.44	0.4392
0.46	0.3654	0.44	0.4392
0.4639	0.3695	0.44	0.44
0.4639	0.3695	0.44	0.44
0.4639	0.3695	0.44	0.44
0.4639	0.3695	0.44	0.44
0.4639	0.3695	0.44	0.44
0.4639	0.3695	0.44	0.44
0.468	0.3695	0.44	0.44
0.468	0.3695	0.44	0.44
0.468	0.3695	0.44	0.44
0.47	0.3695	0.4433	0.44
0.47	0.3695	0.4433	0.44
0.47	0.3695	0.4475	0.44
0.4721	0.3695	0.4475	0.44
0.4721	0.3695	0.4475	0.44
0.4721	0.37	0.4475	0.44
0.4762	0.37	0.45	0.4433
0.4762	0.37	0.45	0.4475
0.4762	0.37	0.45	0.45
0.4762	0.37	0.45	0.45
0.48	0.37	0.45	0.45
0.48	0.37	0.45	0.45
0.48	0.37	0.45	0.45
0.48	0.37	0.45	0.45
0.48	0.37	0.45	0.45
0.4803	0.37	0.45	0.45
0.4803	0.37	0.4516	0.4557
0.4803	0.3736	0.4516	0.4598
0.4844	0.3736	0.4516	0.4598
0.4844	0.3736	0.4516	0.4598
0.4844	0.3736	0.4557	0.4598
0.4844	0.3736	0.4557	0.46
0.4844	0.3736	0.4557	0.46
0.4844	0.3736	0.4598	0.46
0.4844	0.3736	0.4598	0.46
0.4844	0.3736	0.46	0.46
0.4885	0.3777	0.46	0.46
0.4885	0.3777	0.46	0.46
0.4885	0.3777	0.46	0.46
0.49	0.3777	0.46	0.46
0.49	0.3777	0.46	0.46
0.49	0.3777	0.46	0.46
0.4926	0.3777	0.46	0.46
0.4926	0.3777	0.46	0.46
0.4967	0.3777	0.46	0.46
0.4967	0.3777	0.46	0.46
0.4967	0.3777	0.46	0.46
0.4967	0.3777	0.46	0.468
0.4967	0.3777	0.46	0.468
0.4967	0.38	0.46	0.47
0.5	0.38	0.4639	0.47
0.5	0.38	0.4639	0.47
0.5	0.38	0.468	0.47
0.5	0.38	0.468	0.47
0.5	0.38	0.47	0.4762
0.5008	0.3818	0.47	0.4762
0.5008	0.3818	0.47	0.4762
0.5008	0.3818	0.47	0.48
0.5008	0.3818	0.47	0.48
0.5008	0.3818	0.47	0.48
0.5008	0.3818	0.47	0.48
0.5049	0.3818	0.4721	0.48
0.5049	0.3859	0.4721	0.48
0.5049	0.3859	0.4721	0.48
0.5049	0.3859	0.4762	0.48
0.509	0.3859	0.4762	0.48
0.509	0.3859	0.48	0.48
0.509	0.3859	0.48	0.48
0.509	0.3859	0.48	0.48
0.509	0.3859	0.48	0.4803
0.51	0.3859	0.48	0.4803
0.51	0.3859	0.48	0.4803
0.51	0.3859	0.48	0.4885
0.51	0.3859	0.48	0.49
0.5131	0.3859	0.48	0.49
0.5131	0.3859	0.48	0.49
0.5131	0.3859	0.48	0.49
0.5131	0.3859	0.48	0.49
0.5131	0.3859	0.48	0.49
0.5131	0.3859	0.48	0.49
0.5172	0.39	0.48	0.49
0.5172	0.39	0.48	0.49
0.5172	0.39	0.48	0.49
0.52	0.39	0.4803	0.49
0.52	0.39	0.4844	0.49
0.52	0.39	0.4844	0.4926
0.52	0.39	0.4844	0.5
0.5213	0.39	0.4885	0.5
0.5213	0.39	0.4885	0.5
0.5213	0.39	0.49	0.5
0.5213	0.39	0.49	0.5
0.5254	0.39	0.49	0.5
0.5254	0.39	0.49	0.5
0.5254	0.39	0.49	0.5
0.5296	0.39	0.49	0.5
0.5296	0.39	0.49	0.5
0.5296	0.39	0.49	0.5
0.5296	0.39	0.49	0.5
0.5296	0.39	0.49	0.5
0.5296	0.3941	0.49	0.5
0.5296	0.3941	0.4926	0.5008
0.5296	0.3941	0.4926	0.5008
0.53	0.3941	0.4926	0.5049
0.5337	0.3941	0.5	0.5049
0.5337	0.3941	0.5	0.509
0.5337	0.3941	0.5	0.51
0.5337	0.3941	0.5	0.51
0.5378	0.3941	0.5	0.51
0.5378	0.3941	0.5	0.51
0.5378	0.3982	0.5	0.51
0.5378	0.3982	0.5	0.51
0.5378	0.3982	0.5	0.51
0.5378	0.3982	0.5	0.51
0.5378	0.3982	0.5	0.51
0.54	0.3982	0.5008	0.5172
0.54	0.3982	0.5049	0.5172
0.54	0.3982	0.5049	0.52
0.54	0.3982	0.5049	0.52
0.5419	0.3982	0.5049	0.52
0.5419	0.4	0.509	0.52
0.5419	0.4	0.509	0.52
0.546	0.4	0.509	0.52
0.546	0.4023	0.51	0.52
0.546	0.4023	0.51	0.52
0.546	0.4023	0.51	0.52
0.546	0.4023	0.51	0.52
0.546	0.4023	0.51	0.5213
0.55	0.4023	0.51	0.5254
0.55	0.4023	0.51	0.5254
0.55	0.4023	0.51	0.5296
0.55	0.4023	0.5172	0.53
0.5501	0.4064	0.5172	0.53
0.5501	0.4064	0.52	0.53
0.5501	0.4064	0.52	0.53
0.5501	0.4064	0.52	0.53
0.5501	0.4064	0.52	0.53
0.5501	0.4064	0.52	0.53
0.5501	0.4064	0.52	0.53
0.5501	0.4064	0.52	0.5337
0.5542	0.41	0.52	0.5337
0.5542	0.41	0.5254	0.5337
0.5542	0.41	0.5254	0.5337
0.5583	0.41	0.5296	0.5378
0.5583	0.41	0.53	0.54
0.5583	0.41	0.53	0.54
0.5583	0.41	0.53	0.54
0.5583	0.41	0.53	0.54
0.5583	0.41	0.53	0.54
0.5583	0.41	0.53	0.54
0.5583	0.4105	0.53	0.55
0.5583	0.4105	0.53	0.55
0.56	0.4105	0.53	0.55
0.56	0.4146	0.53	0.55
0.5624	0.4146	0.53	0.55
0.5624	0.4146	0.5378	0.55
0.5624	0.4146	0.5378	0.55
0.5624	0.4146	0.54	0.55
0.5665	0.4146	0.54	0.55
0.5665	0.4146	0.54	0.55
0.5665	0.4146	0.54	0.55
0.5665	0.4146	0.54	0.55
0.5665	0.4146	0.54	0.5583
0.57	0.4146	0.54	0.5583
0.57	0.4146	0.5419	0.56
0.57	0.4146	0.546	0.56
0.57	0.4146	0.546	0.56
0.57	0.4146	0.55	0.56
0.57	0.4187	0.55	0.56
0.57	0.4187	0.55	0.56
0.5706	0.4187	0.55	0.56
0.5706	0.4187	0.55	0.56
0.5706	0.4187	0.55	0.56
0.58	0.4187	0.55	0.5624
0.58	0.4187	0.55	0.5624
0.58	0.4187	0.5501	0.5665
0.5829	0.4187	0.5501	0.5665
0.5829	0.4187	0.5501	0.57
0.5829	0.4187	0.5542	0.57
0.5829	0.42	0.5542	0.57
0.587	0.42	0.56	0.57
0.587	0.42	0.56	0.57
0.587	0.42	0.56	0.57
0.59	0.4228	0.56	0.57
0.59	0.4228	0.56	0.57
0.5911	0.4228	0.56	0.57
0.5911	0.4228	0.56	0.57
0.5952	0.4228	0.56	0.57
0.5952	0.4228	0.5624	0.57
0.5952	0.4228	0.5624	0.57
0.5993	0.4228	0.5624	0.57
0.5993	0.4228	0.5624	0.57
0.5993	0.4228	0.5665	0.5706
0.5993	0.4228	0.5665	0.5747
0.6	0.4228	0.57	0.5788
0.6	0.4228	0.57	0.58
0.6	0.4228	0.57	0.58
0.6	0.4228	0.57	0.58
0.6	0.4228	0.57	0.58
0.6	0.4269	0.57	0.58
0.6	0.4269	0.57	0.58
0.6	0.4269	0.57	0.58
0.6	0.4269	0.57	0.58
0.6034	0.4269	0.57	0.58
0.6076	0.43	0.57	0.58
0.6076	0.43	0.57	0.5829
0.6076	0.43	0.5747	0.587
0.61	0.43	0.5747	0.59
0.61	0.431	0.58	0.59
0.61	0.431	0.58	0.59
0.61	0.431	0.58	0.59
0.61	0.431	0.58	0.59
0.61	0.431	0.58	0.59
0.61	0.431	0.58	0.59
0.61	0.431	0.5829	0.5911
0.6117	0.431	0.59	0.5993
0.6117	0.4351	0.59	0.6
0.6117	0.4351	0.59	0.6
0.6158	0.4351	0.59	0.6
0.6158	0.4351	0.59	0.6
0.6199	0.4351	0.59	0.6
0.6199	0.4351	0.59	0.6
0.6199	0.4392	0.5911	0.6
0.6199	0.4392	0.5952	0.6
0.6199	0.4392	0.5993	0.6
0.6199	0.4392	0.5993	0.6
0.62	0.4392	0.6	0.6076
0.62	0.4392	0.6	0.61
0.62	0.4392	0.6	0.61
0.6281	0.44	0.6	0.61
0.6281	0.44	0.6	0.61
0.6281	0.44	0.6	0.61
0.63	0.44	0.61	0.61
0.63	0.44	0.61	0.61
0.63	0.44	0.61	0.6117
0.6322	0.44	0.61	0.6117
0.6322	0.4433	0.61	0.6117
0.6322	0.4433	0.61	0.6117
0.6322	0.4433	0.61	0.62
0.6363	0.4433	0.61	0.62
0.6363	0.4433	0.61	0.62
0.64	0.4433	0.6117	0.62
0.64	0.4433	0.6117	0.62
0.6404	0.4475	0.6158	0.62
0.6404	0.4475	0.6158	0.62
0.6404	0.4475	0.6199	0.62
0.6445	0.4475	0.62	0.62
0.6445	0.4475	0.62	0.63
0.6445	0.4475	0.62	0.63
0.6486	0.45	0.62	0.63
0.6486	0.45	0.62	0.64
0.6486	0.45	0.62	0.64
0.6568	0.4516	0.62	0.64
0.6568	0.4516	0.62	0.64
0.66	0.4516	0.62	0.64
0.6609	0.4516	0.624	0.64
0.6691	0.4516	0.6281	0.64
0.6691	0.4516	0.63	0.6445
0.6691	0.4516	0.63	0.65
0.67	0.4516	0.63	0.65
0.67	0.4516	0.6322	0.65
0.6732	0.4516	0.6363	0.65
0.6732	0.4516	0.6363	0.65
0.6773	0.4516	0.6363	0.65
0.6773	0.4516	0.64	0.65
0.6773	0.4516	0.64	0.65
0.6773	0.4557	0.64	0.65
0.6773	0.4557	0.64	0.65
0.68	0.4557	0.64	0.6527
0.68	0.4557	0.64	0.6527
0.6814	0.4557	0.64	0.6527
0.6814	0.4557	0.64	0.6568
0.6814	0.4557	0.64	0.6568
0.6855	0.4557	0.64	0.66
0.6855	0.4557	0.64	0.66
0.6855	0.4598	0.64	0.66
0.6855	0.4598	0.64	0.66
0.6897	0.4598	0.6404	0.66
0.69	0.4598	0.6445	0.66
0.69	0.4598	0.6486	0.66
0.69	0.4598	0.65	0.66
0.69	0.4598	0.65	0.66
0.69	0.4598	0.65	0.6609
0.6938	0.4598	0.65	0.665
0.6938	0.4598	0.65	0.67
0.6938	0.46	0.65	0.67
0.6938	0.46	0.6527	0.67
0.6938	0.46	0.6568	0.67
0.6979	0.46	0.66	0.67
0.6979	0.46	0.66	0.67
0.6979	0.4639	0.66	0.67
0.6979	0.4639	0.66	0.67
0.6979	0.4639	0.665	0.67
0.7	0.4639	0.6691	0.6773
0.7	0.4639	0.6691	0.68
0.7	0.4639	0.67	0.68
0.7	0.4639	0.67	0.68
0.702	0.4639	0.67	0.68
0.702	0.4639	0.67	0.68
0.702	0.4639	0.67	0.68
0.702	0.4639	0.67	0.68
0.7061	0.4639	0.68	0.68
0.7061	0.4639	0.68	0.68
0.7061	0.4639	0.68	0.6814
0.71	0.4639	0.68	0.6855
0.71	0.4639	0.68	0.6897
0.7102	0.468	0.6814	0.6897
0.7102	0.468	0.6855	0.6897
0.7102	0.468	0.6855	0.69
0.7102	0.468	0.6855	0.69
0.7143	0.468	0.6897	0.69
0.7143	0.468	0.6897	0.69
0.7143	0.468	0.6897	0.69
0.7225	0.468	0.6897	0.69
0.7266	0.468	0.69	0.69
0.7266	0.468	0.69	0.69
0.73	0.468	0.69	0.6938
0.73	0.468	0.69	0.6979
0.73	0.468	0.69	0.6979
0.73	0.47	0.69	0.7
0.7307	0.47	0.69	0.7
0.7307	0.47	0.6938	0.7
0.7348	0.47	0.7	0.7
0.7348	0.47	0.7	0.7061
0.7348	0.4721	0.7	0.71
0.7389	0.4721	0.7	0.71
0.74	0.4721	0.702	0.71
0.74	0.4721	0.702	0.71
0.743	0.4721	0.71	0.71
0.743	0.4721	0.71	0.71
0.743	0.4721	0.71	0.71
0.743	0.4721	0.71	0.71
0.7471	0.4721	0.71	0.71
0.75	0.4721	0.71	0.71
0.75	0.4721	0.7143	0.7102
0.7553	0.4721	0.7184	0.7102
0.7553	0.4721	0.72	0.7102
0.7553	0.4762	0.72	0.7184
0.7553	0.4762	0.72	0.72
0.7594	0.4762	0.72	0.72
0.7594	0.48	0.72	0.72
0.7594	0.48	0.72	0.7225
0.7594	0.48	0.7225	0.7225
0.7594	0.48	0.73	0.7266
0.76	0.48	0.73	0.73
0.76	0.48	0.73	0.73
0.76	0.48	0.73	0.73
0.7635	0.4803	0.73	0.73
0.7635	0.4803	0.73	0.73
0.7635	0.4803	0.73	0.73
0.7635	0.4803	0.73	0.73
0.7676	0.4803	0.73	0.7348
0.7676	0.4803	0.73	0.7389
0.7676	0.4803	0.73	0.7389
0.77	0.4803	0.7348	0.74
0.77	0.4844	0.7348	0.74
0.7718	0.4844	0.7389	0.74
0.7718	0.4844	0.74	0.75
0.7718	0.4844	0.74	0.75
0.7718	0.4844	0.74	0.75
0.7759	0.4844	0.74	0.75
0.7759	0.4844	0.74	0.75
0.7759	0.4844	0.7471	0.75
0.7759	0.4844	0.75	0.7512
0.78	0.4844	0.75	0.7512
0.78	0.4844	0.75	0.7594
0.78	0.4844	0.75	0.76
0.78	0.4885	0.7553	0.76
0.78	0.4885	0.7594	0.76
0.78	0.4885	0.76	0.76
0.7841	0.4885	0.76	0.76
0.7841	0.4885	0.76	0.76
0.7841	0.4885	0.76	0.77
0.7841	0.4885	0.76	0.77
0.7841	0.49	0.7635	0.77
0.7841	0.49	0.7676	0.77
0.7841	0.4926	0.7676	0.77
0.7882	0.4926	0.77	0.7718
0.7882	0.4926	0.77	0.7718
0.7882	0.4926	0.77	0.78
0.79	0.4967	0.77	0.78
0.79	0.4967	0.77	0.78
0.79	0.4967	0.7759	0.78
0.79	0.4967	0.7759	0.78
0.7923	0.4967	0.7759	0.78
0.7923	0.4967	0.78	0.78
0.7923	0.5	0.78	0.79
0.7964	0.5	0.78	0.79
0.7964	0.5	0.78	0.79
0.7964	0.5	0.78	0.79
0.7964	0.5	0.78	0.79
0.8	0.5	0.78	0.79
0.8	0.5	0.78	0.8
0.8	0.5	0.78	0.8
0.8	0.5008	0.7882	0.8
0.8005	0.5008	0.79	0.8
0.8005	0.5008	0.79	0.8
0.8005	0.5008	0.79	0.8005
0.8005	0.5008	0.79	0.8087
0.8005	0.5008	0.79	0.8087
0.8005	0.5008	0.7923	0.81
0.8087	0.5049	0.7964	0.81
0.8087	0.5049	0.7964	0.81
0.8087	0.5049	0.8	0.81
0.8128	0.5049	0.8	0.81
0.8169	0.5049	0.8	0.81
0.8169	0.509	0.8	0.81
0.82	0.509	0.8	0.8169
0.821	0.509	0.8	0.82
0.821	0.509	0.8	0.82
0.821	0.509	0.8005	0.821
0.821	0.509	0.8005	0.8292
0.821	0.509	0.8005	0.83
0.8251	0.51	0.81	0.83
0.8292	0.51	0.8128	0.83
0.8292	0.51	0.8169	0.83
0.8333	0.51	0.82	0.83
0.8333	0.51	0.82	0.83
0.8333	0.5131	0.82	0.8333
0.8333	0.5131	0.82	0.8333
0.8333	0.5131	0.82	0.8333
0.8374	0.5131	0.821	0.8374
0.84	0.5131	0.821	0.8374
0.84	0.5131	0.8251	0.84
0.8415	0.5131	0.83	0.84
0.8456	0.5131	0.83	0.84
0.8498	0.5131	0.83	0.84
0.8498	0.5131	0.83	0.84
0.85	0.5131	0.84	0.8498
0.8539	0.5131	0.84	0.85
0.8539	0.5172	0.84	0.85
0.858	0.5172	0.84	0.85
0.858	0.5172	0.84	0.85
0.86	0.5172	0.84	0.85
0.8621	0.52	0.8415	0.85
0.8662	0.52	0.8498	0.85
0.8662	0.52	0.85	0.85
0.8662	0.52	0.85	0.85
0.8662	0.52	0.85	0.86
0.87	0.52	0.85	0.86
0.8703	0.5213	0.85	0.86
0.8703	0.5213	0.85	0.8662
0.8703	0.5213	0.85	0.87
0.8744	0.5213	0.85	0.87
0.8744	0.5213	0.85	0.87
0.8744	0.5213	0.86	0.8703
0.8785	0.5213	0.86	0.88
0.8785	0.5213	0.86	0.88
0.88	0.5213	0.86	0.88
0.88	0.5213	0.86	0.8867
0.88	0.5296	0.86	0.89
0.8867	0.5296	0.8621	0.89
0.8867	0.5296	0.8662	0.89
0.89	0.5296	0.87	0.89
0.8908	0.53	0.87	0.8908
0.8949	0.53	0.87	0.8949
0.899	0.53	0.87	0.899
0.9	0.53	0.87	0.9
0.9	0.53	0.87	0.9
0.9031	0.53	0.87	0.9
0.9031	0.53	0.87	0.91
0.9031	0.5337	0.8785	0.91
0.9031	0.5337	0.88	0.91
0.9072	0.5337	0.88	0.91
0.9072	0.5337	0.8826	0.9113
0.9072	0.5337	0.8867	0.92
0.9072	0.5337	0.8867	0.92
0.9072	0.5337	0.89	0.92
0.91	0.5337	0.89	0.92
0.91	0.5337	0.89	0.92
0.91	0.5378	0.89	0.92
0.9113	0.5378	0.8949	0.92
0.9113	0.5378	0.8949	0.9236
0.9113	0.5378	0.8949	0.9236
0.9113	0.5378	0.9	0.93
0.9154	0.5378	0.9	0.93
0.9154	0.54	0.9031	0.93
0.9195	0.54	0.9072	0.93
0.9195	0.54	0.9072	0.9319
0.9195	0.54	0.9072	0.94
0.92	0.5419	0.9072	0.94
0.92	0.5419	0.91	0.94
0.92	0.5419	0.91	0.9442
0.9236	0.5419	0.91	0.9442
0.9236	0.5419	0.91	0.9442
0.9277	0.5419	0.91	0.95
0.9277	0.546	0.9154	0.95
0.9277	0.546	0.9195	0.95
0.93	0.546	0.92	0.9565
0.9319	0.546	0.92	0.9565
0.9319	0.55	0.92	0.96
0.9319	0.55	0.9236	0.96
0.936	0.55	0.9277	0.96
0.936	0.55	0.93	0.96
0.94	0.55	0.93	0.96
0.9442	0.55	0.94	0.9606
0.9483	0.5501	0.94	0.9647
0.9483	0.5501	0.94	0.9647
0.95	0.5501	0.94	0.97
0.95	0.5501	0.94	0.97
0.9524	0.5501	0.9565	0.97
0.9524	0.5542	0.9565	0.97
0.9524	0.5542	0.96	0.97
0.9565	0.5542	0.96	0.98
0.9565	0.5542	0.96	0.98
0.9565	0.5542	0.96	0.98
0.96	0.5542	0.9647	0.9852
0.96	0.5542	0.9688	0.99
0.9606	0.5542	0.97	0.99
0.9606	0.5583	0.97	0.99
0.9647	0.5583	0.99	0.99
0.9647	0.5583	0.99	0.99
0.97	0.5583	0.99	0.99
0.97	0.56	0.99	0.99
0.97	0.56	0.9934	1
0.977	0.56	0.9934	1.0016
0.977	0.56	0.9975	1.0057
0.977	0.56	0.9975	1.01
0.9811	0.5624	1	1.01
0.9811	0.5624	1	1.01
0.9852	0.5624	1	1.01
0.99	0.5624	1.01	1.01
0.9934	0.5624	1.01	1.01
0.9934	0.5624	1.01	1.0181
0.9934	0.5665	1.01	1.02
1	0.5665	1.01	1.02
1.0057	0.5665	1.014	1.02
1.0057	0.5665	1.02	1.03
1.0098	0.5665	1.02	1.03
1.0098	0.5665	1.02	1.03
1.01	0.5665	1.0222	1.04
1.01	0.5665	1.0222	1.04
1.0181	0.5665	1.03	1.04
1.02	0.57	1.03	1.04
1.02	0.57	1.03	1.04
1.0222	0.57	1.03	1.04
1.0222	0.57	1.03	1.0468
1.0263	0.57	1.03	1.0509
1.0263	0.57	1.03	1.06
1.0263	0.5706	1.0304	1.06
1.03	0.5706	1.0304	1.06
1.03	0.5747	1.0345	1.06
1.03	0.5747	1.0386	1.06
1.03	0.5747	1.04	1.06
1.03	0.5747	1.04	1.07
1.0304	0.5747	1.0427	1.0796
1.0345	0.5747	1.05	1.08
1.0386	0.5747	1.0509	1.08
1.0386	0.5747	1.055	1.08
1.0427	0.5747	1.06	1.0878
1.0427	0.5788	1.06	1.09
1.0427	0.5788	1.0673	1.09
1.0427	0.5788	1.0673	1.09
1.0468	0.5788	1.07	1.0919
1.0468	0.58	1.07	1.1
1.0509	0.58	1.0755	1.1
1.055	0.58	1.0755	1.1
1.0591	0.58	1.08	1.1
1.06	0.58	1.08	1.1
1.06	0.58	1.08	1.1084
1.0632	0.5829	1.08	1.1084
1.0673	0.5829	1.08	1.11
1.0714	0.5829	1.08	1.11
1.0714	0.5829	1.0837	1.1166
1.0714	0.5829	1.09	1.12
1.0755	0.5829	1.1	1.12
1.0755	0.587	1.1	1.12
1.0796	0.587	1.1	1.1248
1.08	0.587	1.1	1.13
1.08	0.587	1.1	1.13
1.0837	0.587	1.1	1.13
1.0878	0.587	1.1	1.14
1.0878	0.587	1.11	1.14
1.0878	0.587	1.11	1.15
1.09	0.587	1.11	1.15
1.0919	0.59	1.12	1.15
1.0919	0.5911	1.12	1.1576
1.0961	0.5911	1.12	1.16
1.1	0.5911	1.13	1.16
1.1	0.5911	1.13	1.16
1.1043	0.5911	1.13	1.16
1.1084	0.5911	1.13	1.1617
1.1084	0.5911	1.1371	1.1699
1.1084	0.5952	1.14	1.17
1.1084	0.5952	1.14	1.17
1.1084	0.5952	1.14	1.17
1.1084	0.5952	1.14	1.1741
1.11	0.5952	1.14	1.1782
1.1166	0.5952	1.1453	1.18
1.1166	0.5993	1.1494	1.18
1.12	0.5993	1.15	1.18
1.1207	0.5993	1.15	1.1823
1.1207	0.5993	1.1576	1.1864
1.1248	0.5993	1.16	1.19
1.1289	0.5993	1.16	1.19
1.1289	0.5993	1.1617	1.2
1.13	0.5993	1.1658	1.2
1.13	0.5993	1.17	1.2
1.1371	0.5993	1.17	1.2028
1.14	0.6	1.17	1.21
1.1412	0.6	1.1741	1.21
1.1453	0.6	1.1741	1.21
1.1494	0.6	1.18	1.21
1.1494	0.6	1.18	1.21
1.15	0.6	1.1864	1.22
1.15	0.6	1.19	1.22
1.15	0.6	1.19	1.22
1.15	0.6	1.19	1.22
1.15	0.6	1.2	1.23
1.1576	0.6034	1.2	1.23
1.16	0.6034	1.2028	1.23
1.1617	0.6034	1.2069	1.23
1.17	0.6034	1.21	1.23
1.17	0.6076	1.21	1.2356
1.17	0.6076	1.2151	1.24
1.1741	0.6076	1.22	1.25
1.1782	0.6076	1.22	1.25
1.18	0.6076	1.22	1.25
1.18	0.6076	1.23	1.252
1.1823	0.61	1.2397	1.252
1.1823	0.61	1.2397	1.26
1.1864	0.61	1.24	1.26
1.1864	0.61	1.24	1.26
1.19	0.61	1.2479	1.26
1.19	0.6117	1.25	1.26
1.19	0.6117	1.25	1.2644
1.19	0.6117	1.25	1.28
1.19	0.6117	1.252	1.28
1.1905	0.6117	1.26	1.28
1.1946	0.6158	1.26	1.28
1.1946	0.6158	1.26	1.28
1.1987	0.6158	1.2603	1.28
1.2	0.6158	1.27	1.28
1.2	0.6158	1.27	1.2808
1.2028	0.6158	1.28	1.2808
1.2028	0.6158	1.28	1.3
1.2069	0.6158	1.28	1.3
1.211	0.6158	1.28	1.3013
1.211	0.6158	1.2808	1.31
1.2151	0.6158	1.2849	1.31
1.2151	0.6199	1.2849	1.31
1.2192	0.6199	1.289	1.31
1.2192	0.6199	1.29	1.3259
1.2192	0.6199	1.29	1.33
1.22	0.6199	1.3	1.33
1.22	0.6199	1.3013	1.34
1.2274	0.6199	1.3054	1.34
1.2274	0.6199	1.3095	1.34
1.24	0.6199	1.31	1.34
1.24	0.6199	1.31	1.35
1.24	0.6199	1.31	1.35
1.2438	0.6199	1.3136	1.35
1.25	0.62	1.32	1.3506
1.252	0.62	1.3259	1.36
1.252	0.62	1.33	1.3711
1.2562	0.62	1.33	1.38
1.26	0.62	1.33	1.38
1.2603	0.62	1.33	1.38
1.2603	0.624	1.34	1.38
1.2603	0.624	1.3465	1.38
1.2644	0.624	1.35	1.4
1.2685	0.624	1.35	1.4
1.27	0.624	1.35	1.4
1.28	0.6281	1.35	1.41
1.28	0.6281	1.3588	1.41
1.289	0.6281	1.36	1.41
1.2972	0.6281	1.36	1.42
1.3	0.63	1.36	1.42
1.3	0.63	1.36	1.4368
1.3054	0.63	1.36	1.44
1.31	0.6322	1.36	1.44
1.3136	0.6322	1.367	1.445
1.3177	0.6322	1.367	1.445
1.3177	0.6322	1.37	1.4491
1.32	0.6322	1.3711	1.45
1.3218	0.6322	1.38	1.45
1.3259	0.6322	1.38	1.45
1.33	0.6322	1.39	1.46
1.33	0.6363	1.39	1.46
1.3341	0.6363	1.3916	1.46
1.3341	0.6363	1.3957	1.46
1.3383	0.6363	1.3998	1.47
1.34	0.6363	1.4	1.48
1.3424	0.6363	1.4	1.48
1.3424	0.6363	1.41	1.48
1.3465	0.6363	1.41	1.49
1.3465	0.6363	1.41	1.49
1.3465	0.6363	1.41	1.49
1.3547	0.6363	1.42	1.5
1.3588	0.64	1.42	1.5
1.36	0.64	1.42	1.51
1.36	0.64	1.4245	1.52
1.3629	0.64	1.4286	1.52
1.367	0.64	1.4286	1.53
1.37	0.64	1.43	1.54
1.37	0.64	1.4409	1.54
1.37	0.6404	1.4532	1.54
1.3752	0.6404	1.4532	1.56
1.3793	0.6404	1.46	1.56
1.38	0.6404	1.47	1.564
1.3875	0.6404	1.47	1.58
1.39	0.6404	1.47	1.59
1.3957	0.6445	1.47	1.6
1.3957	0.6445	1.4737	1.6
1.4	0.6445	1.4778	1.601
1.4	0.6445	1.48	1.6051
1.4039	0.6445	1.48	1.61
1.4039	0.6445	1.49	1.6133
1.408	0.6445	1.4901	1.6174
1.408	0.65	1.4984	1.62
1.41	0.65	1.5	1.63
1.4163	0.6527	1.5	1.63
1.42	0.6527	1.5	1.64
1.42	0.6527	1.51	1.65
1.42	0.6527	1.52	1.65
1.4204	0.6527	1.5271	1.6543
1.4286	0.6527	1.5271	1.66
1.4327	0.6527	1.53	1.66
1.44	0.6568	1.5353	1.66
1.445	0.6568	1.54	1.6667
1.445	0.6568	1.55	1.67
1.445	0.6568	1.55	1.67
1.45	0.6568	1.5517	1.67
1.4532	0.6568	1.56	1.68
1.4573	0.6568	1.56	1.68
1.46	0.6568	1.56	1.68
1.46	0.66	1.56	1.7
1.46	0.66	1.57	1.7077
1.46	0.66	1.58	1.73
1.4614	0.6609	1.59	1.73
1.4614	0.6609	1.59	1.74
1.4778	0.6609	1.6	1.74
1.48	0.6609	1.61	1.7406
1.486	0.6609	1.61	1.7406
1.49	0.6691	1.61	1.75
1.49	0.6691	1.61	1.76
1.4901	0.6691	1.62	1.76
1.4942	0.6691	1.6215	1.76
1.5	0.6691	1.6543	1.77
1.5	0.6691	1.66	1.7734
1.5025	0.6691	1.66	1.78
1.5025	0.6691	1.66	1.78
1.51	0.6691	1.66	1.7816
1.51	0.67	1.67	1.79
1.51	0.67	1.68	1.79
1.51	0.67	1.68	1.8
1.51	0.67	1.68	1.8
1.5107	0.67	1.6995	1.81
1.5148	0.6732	1.7	1.81
1.53	0.6732	1.72	1.81
1.5312	0.6732	1.72	1.82
1.5394	0.6773	1.72	1.84
1.5394	0.6773	1.74	1.84
1.54	0.6773	1.74	1.85
1.54	0.6773	1.74	1.85
1.54	0.6773	1.7447	1.8555
1.54	0.68	1.76	1.87
1.54	0.6814	1.76	1.88
1.5435	0.6814	1.76	1.88
1.5476	0.6814	1.78	1.88
1.5517	0.6814	1.78	1.9
1.5558	0.6814	1.7898	1.9
1.5558	0.6814	1.79	1.9
1.5558	0.6855	1.8	1.91
1.5599	0.6855	1.8	1.91
1.5599	0.6855	1.8	1.91
1.5599	0.6855	1.8062	1.92
1.56	0.6855	1.81	1.96
1.56	0.6855	1.8103	1.9663
1.56	0.6897	1.82	1.97
1.564	0.6897	1.82	1.97
1.5681	0.69	1.8227	1.9828
1.5722	0.69	1.83	2
1.5722	0.69	1.83	2.01
1.58	0.69	1.83	2.03
1.5805	0.69	1.8391	2.03
1.5846	0.69	1.84	2.03
1.5846	0.69	1.8432	2.03
1.5846	0.69	1.86	2.03
1.59	0.6938	1.86	2.032
1.5928	0.6938	1.88	2.04
1.5969	0.6979	1.88	2.04
1.6	0.6979	1.88	2.04
1.6092	0.6979	1.88	2.04
1.61	0.6979	1.89	2.05
1.61	0.6979	1.9	2.05
1.6133	0.7	1.9	2.05
1.6133	0.7	1.91	2.05
1.6215	0.702	1.91	2.0607
1.6256	0.702	1.92	2.0649
1.6297	0.702	1.93	2.08
1.63	0.7061	1.94	2.09
1.6379	0.7061	1.95	2.09
1.642	0.7061	1.95	2.1018
1.65	0.71	1.96	2.13
1.6543	0.71	1.97	2.13
1.6626	0.71	2	2.13
1.6626	0.71	2	2.13
1.6667	0.71	2.01	2.17
1.6667	0.71	2.0197	2.18
1.6667	0.7102	2.0238	2.2
1.67	0.7102	2.05	2.2
1.67	0.7143	2.07	2.21
1.6708	0.7143	2.0895	2.23
1.679	0.7143	2.09	2.24
1.6872	0.7143	2.09	2.25
1.6872	0.7143	2.0977	2.26
1.69	0.7184	2.1	2.26
1.6954	0.7225	2.1	2.27
1.7	0.7225	2.11	2.27
1.7036	0.7225	2.11	2.28
1.7036	0.7225	2.11	2.2824
1.7077	0.7225	2.13	2.29
1.71	0.7225	2.147	2.29
1.7118	0.7266	2.15	2.29
1.7159	0.7266	2.15	2.33
1.72	0.7266	2.16	2.3481
1.7241	0.7266	2.16	2.36
1.7282	0.7266	2.18	2.37
1.7282	0.73	2.2	2.4179
1.7364	0.73	2.2126	2.43
1.74	0.73	2.23	2.43
1.7447	0.73	2.24	2.44
1.7488	0.73	2.25	2.44
1.75	0.73	2.2537	2.45
1.75	0.7307	2.27	2.4671
1.757	0.7307	2.27	2.47
1.77	0.7307	2.28	2.47
1.7734	0.7348	2.34	2.4713
1.7898	0.7348	2.36	2.48
1.79	0.7348	2.38	2.5041
1.7939	0.7348	2.38	2.5246
1.8	0.7348	2.4	2.53
1.8	0.7348	2.4	2.55
1.8	0.7389	2.4056	2.57
1.8021	0.7389	2.41	2.57
1.8062	0.7389	2.41	2.5821
1.81	0.7389	2.41	2.59
1.8185	0.74	2.4179	2.6
1.8185	0.74	2.44	2.6
1.8185	0.74	2.4548	2.63
1.83	0.74	2.48	2.6396
1.8309	0.743	2.51	2.64
1.85	0.743	2.51	2.64
1.8514	0.743	2.52	2.66
1.8637	0.743	2.5451	2.68
1.8842	0.743	2.59	2.68
1.9	0.743	2.6	2.7093
1.9	0.7471	2.6272	2.71
1.9006	0.7471	2.63	2.74
1.9006	0.7471	2.67	2.76
1.9171	0.7471	2.69	2.7791
1.92	0.7471	2.7011	2.78
1.92	0.75	2.7093	2.7873
1.9212	0.75	2.71	2.79
1.9294	0.75	2.71	2.8243
1.93	0.75	2.72	2.86
1.93	0.7512	2.75	2.8736
1.9376	0.7512	2.76	2.9
1.94	0.7553	2.77	2.94
1.9417	0.7553	2.7791	2.94
1.9499	0.7553	2.8	3.1
1.95	0.7594	2.84	3.1075
1.95	0.7594	2.87	3.15
1.95	0.7594	2.9023	3.1896
1.96	0.7594	2.9146	3.27
1.97	0.7594	2.92	3.27
1.97	0.76	2.95	3.28
1.9745	0.76	2.9515	3.29
1.9786	0.76	2.96	3.34
1.9786	0.76	3	3.41
1.98	0.7635	3.02	3.42
1.9828	0.7635	3.09	3.43
1.9951	0.7635	3.1	3.49
1.9992	0.7635	3.1158	3.5
2.0033	0.7635	3.1404	3.5057
2.0033	0.7635	3.15	3.51
2.0115	0.7676	3.15	3.58
2.0156	0.7676	3.18	3.65
2.0238	0.77	3.1814	3.65
2.03	0.77	3.2184	3.69
2.0402	0.7718	3.24	3.7
2.0443	0.7718	3.28	3.78
2.0525	0.7759	3.31	3.79
2.06	0.7759	3.31	3.81
2.06	0.7759	3.3169	3.85
2.07	0.7759	3.37	3.94
2.07	0.7759	3.39	3.95
2.08	0.7759	3.39	3.99
2.0854	0.7759	3.43	4
2.1	0.78	3.44	4
2.1	0.78	3.46	4.01
2.1059	0.78	3.46	4.0312
2.11	0.78	3.48	4.05
2.1141	0.78	3.52	4.09
2.1182	0.78	3.5796	4.1
2.12	0.78	3.58	4.16
2.1305	0.78	3.65	4.27
2.1428	0.78	3.67	4.38
2.1552	0.78	3.67	4.4
2.16	0.7841	3.69	4.55
2.16	0.7841	3.7069	4.65
2.1757	0.7841	3.83	4.76
2.18	0.7882	3.83	4.82
2.2	0.7882	3.86	4.85
2.2	0.79	3.9	4.92
2.21	0.79	3.96	4.93
2.22	0.79	4.02	5.0328
2.2291	0.7923	4.04	5.22
2.2291	0.7923	4.05	5.23
2.24	0.7964	4.11	5.35
2.24	0.7964	4.16	5.39
2.25	0.7964	4.27	5.48
2.2537	0.8	4.3	5.69
2.2537	0.8	4.33	5.91
2.27	0.8	4.38	5.94
2.27	0.8	4.43	5.96
2.2701	0.8005	4.56	6.01
2.2742	0.8005	4.58	6.03
2.2865	0.8005	4.74	6.04
2.2906	0.8005	4.82	6.07
2.2947	0.8046	4.82	6.09
2.31	0.8046	4.82	6.21
2.3112	0.8087	4.83	6.21
2.3194	0.8087	4.89	6.41
2.32	0.8087	4.91	6.69
2.32	0.81	5.07	6.87
2.3276	0.81	5.078	7.63
2.3317	0.8128	5.1067	9.32
2.3317	0.8128	5.18	9.83
2.3317	0.8169	5.19	10.5
2.3399	0.8169	5.19	12.02
2.3481	0.8169	5.2	19.28
2.3522	0.8169	5.22
2.3522	0.8169	5.39
2.3727	0.82	5.66
2.3768	0.821	5.71
2.38	0.821	5.72
2.3809	0.821	5.75
2.3809	0.8251	5.81
2.385	0.8251	5.83
2.385	0.8251	5.86
2.4056	0.8292	5.87
2.41	0.8292	5.9
2.41	0.8292	6.02
2.4179	0.8292	6.19
2.42	0.83	6.21
2.4302	0.83	6.55
2.4343	0.83	6.55
2.44	0.83	6.57
2.4466	0.8333	6.63
2.45	0.8374	6.86
2.46	0.84	6.89
2.47	0.84	6.97
2.4795	0.84	7.073
2.48	0.8415	7.13
2.4877	0.8415	7.53
2.49	0.8415	7.91
2.49	0.8415	8.86
2.5	0.8415	9.4
2.5	0.8456	10.89
2.5041	0.8456	10.98
2.5205	0.8456	11.26
2.53	0.8456	11.76
2.53	0.8456	11.93
2.5369	0.8498	13.04
2.541	0.8498	13.36
2.5451	0.8498
2.55	0.8498
2.5575	0.8498
2.5657	0.85
2.57	0.85
2.57	0.85
2.5739	0.85
2.5903	0.8539
2.6	0.8539
2.6108	0.858
2.63	0.858
2.63	0.858
2.6314	0.858
2.64	0.858
2.6437	0.858
2.6765	0.858
2.6806	0.858
2.7135	0.86
2.7217	0.86
2.73	0.86
2.7422	0.86
2.7586	0.8621
2.76	0.8621
2.77	0.8621
2.7709	0.8621
2.78	0.8662
2.7832	0.8662
2.7832	0.8662
2.79	0.8662
2.7956	0.87
2.8	0.87
2.8161	0.87
2.8243	0.8703
2.8325	0.8703
2.8325	0.8744
2.8489	0.8744
2.87	0.8744
2.87	0.8785
2.8818	0.8785
2.8941	0.88
2.9	0.88
2.9023	0.88
2.9064	0.8826
2.91	0.8826
2.92	0.8826
2.9228	0.8867
2.95	0.8867
2.9515	0.8867
2.9557	0.8867
2.96	0.8867
2.968	0.89
2.9762	0.89
2.98	0.89
2.9967	0.8908
3	0.8908
3.0131	0.8908
3.02	0.8949
3.0213	0.899
3.04	0.899
3.046	0.9031
3.05	0.9031
3.0583	0.9031
3.0747	0.9072
3.0788	0.9072
3.1322	0.91
3.1404	0.91
3.1486	0.9113
3.1609	0.9113
3.1691	0.9154
3.1732	0.9154
3.19	0.9154
3.2061	0.9195
3.2102	0.9195
3.2102	0.92
3.23	0.92
3.24	0.92
3.2594	0.9236
3.2676	0.9277
3.27	0.9277
3.2717	0.9277
3.3	0.9277
3.33	0.9277
3.34	0.93
3.34	0.93
3.3415	0.9319
3.38	0.936
3.39	0.936
3.4442	0.94
3.46	0.94
3.46	0.94
3.46	0.94
3.46	0.94
3.4729	0.9401
3.49	0.9401
3.4934	0.9442
3.4934	0.9442
3.5	0.9442
3.5	0.9483
3.5222	0.95
3.53	0.95
3.57	0.95
3.5755	0.95
3.5919	0.9524
3.5919	0.9524
3.6	0.9524
3.6	0.9565
3.6043	0.96
3.63	0.9606
3.6576	0.9647
3.674	0.9647
3.674	0.9688
3.7233	0.9688
3.7397	0.9688
3.81	0.97
3.8218	0.9729
3.8423	0.9729
3.8793	0.9729
3.8957	0.977
3.908	0.98
3.92	0.98
3.9696	0.9811
3.97	0.9811
4	0.9811
4.02	0.9893
4.0312	0.9893
4.0312	0.99
4.0681	0.99
4.0763	0.99
4.0887	0.9934
4.101	0.9934
4.1051	0.9975
4.1092	0.9975
4.1174	1
4.13	1
4.2	1
4.2077	1.0016
4.24	1.01
4.2405	1.01
4.25	1.014
4.31	1.0181
4.34	1.0181
4.34	1.0181
4.36	1.0181
4.3719	1.0181
4.42	1.02
4.4417	1.02
4.46	1.02
4.5115	1.0263
4.52	1.0263
4.5279	1.0263
4.53	1.03
4.5484	1.0304
4.5566	1.0386
4.5772	1.04
4.6059	1.0427
4.6346	1.0427
4.64	1.0427
4.6469	1.0427
4.66	1.05
4.7085	1.05
4.72	1.05
4.73	1.0509
4.73	1.055
4.83	1.0591
4.8358	1.06
4.8727	1.06
4.9	1.0632
4.9302	1.0632
4.963	1.0632
4.9671	1.0673
4.97	1.0673
4.9753	1.07
4.9959	1.07
5.01	1.0714
5.07	1.0714
5.1067	1.0714
5.1313	1.0755
5.22	1.0796
5.22	1.0796
5.2545	1.0796
5.2586	1.08
5.29	1.08
5.2955	1.08
5.3325	1.08
5.3489	1.0837
5.35	1.0837
5.3571	1.0878
5.39	1.09
5.509	1.09
5.509	1.09
5.509	1.0919
5.5131	1.0919
5.53	1.0961
5.56	1.0961
5.61	1.0961
5.62	1.1
5.62	1.1
5.624	1.1
5.6527	1.1
5.6568	1.1043
5.73	1.1043
5.7635	1.1043
5.78	1.1043
5.8128	1.1084
5.85	1.11
5.89	1.11
5.8949	1.11
5.9154	1.11
5.92	1.11
5.9441	1.11
5.9483	1.1125
5.9688	1.1166
6.01	1.1166
6.0509	1.1166
6.07	1.1166
6.1289	1.12
6.41	1.12
6.4203	1.12
6.4327	1.12
6.44	1.1207
6.44	1.1207
6.5353	1.1207
6.8719	1.1248
6.9622	1.1248
7.0074	1.1289
7.02	1.1289
7.03	1.13
7.0648	1.13
7.1	1.13
7.1018	1.133
7.3973	1.133
7.5041	1.1371
7.5041	1.1371
7.5123	1.14
7.52	1.14
7.5574	1.1412
7.6231	1.1453
7.7175	1.1494
7.8	1.15
7.81	1.15
7.87	1.15
7.8817	1.15
7.8941	1.15
7.9023	1.15
7.94	1.16
7.94	1.16
7.95	1.1617
7.96	1.1658
7.98	1.1699
8.01	1.17
8.0172	1.17
8.1198	1.17
8.1814	1.17
8.24	1.17
8.362	1.1741
8.44	1.1741
8.5139	1.1741
8.518	1.1741
8.74	1.1741
8.8587	1.1741
8.96	1.1782
9.1872	1.1782
9.2077	1.1823
9.29	1.1823
9.33	1.1823
9.5812	1.1823
9.61	1.1864
9.95	1.1864
9.9753	1.19
10.1765	1.19
10.41	1.1946
10.8004	1.1946
10.96	1.1987
10.99	1.2
11.0016	1.2028
11.1165	1.2028
11.1986	1.2028
11.24	1.2028
11.2931	1.2069
11.38	1.21
11.9	1.2151
11.97	1.2151
12.09	1.2192
12.1839	1.2192
12.6765	1.2192
12.77	1.2233
12.78	1.2274
12.94	1.23
13.3743	1.23
13.61	1.23
13.793	1.2315
14.46	1.2315
15.46	1.2315
15.84	1.2356
16.48	1.2397
17.25	1.2397
18.18	1.24
18.28	1.24
19.5484	1.2438
21.7	1.2479
22.9	1.25
27.93	1.252
	1.2562
	1.26
	1.2603
	1.2644
	1.2644
	1.27
	1.27
	1.27
	1.2726
	1.2767
	1.2767
	1.28
	1.28
	1.2808
	1.2808
	1.2849
	1.29
	1.3
	1.3013
	1.31
	1.31
	1.3136
	1.32
	1.32
	1.3218
	1.3259
	1.33
	1.33
	1.33
	1.33
	1.3341
	1.3341
	1.3383
	1.34
	1.35
	1.35
	1.35
	1.35
	1.35
	1.3506
	1.3547
	1.3547
	1.36
	1.3629
	1.3629
	1.367
	1.37
	1.3752
	1.3752
	1.3752
	1.38
	1.3834
	1.4
	1.4
	1.4039
	1.4039
	1.4039
	1.4039
	1.408
	1.41
	1.41
	1.4121
	1.4163
	1.42
	1.42
	1.4286
	1.43
	1.43
	1.4327
	1.4327
	1.4327
	1.4368
	1.44
	1.44
	1.445
	1.445
	1.4491
	1.4532
	1.4532
	1.46
	1.46
	1.4614
	1.4696
	1.4696
	1.47
	1.47
	1.4778
	1.4778
	1.4819
	1.4819
	1.486
	1.486
	1.49
	1.4901
	1.4901
	1.5
	1.5
	1.5066
	1.51
	1.51
	1.51
	1.5148
	1.5189
	1.52
	1.523
	1.5271
	1.5271
	1.53
	1.54
	1.5435
	1.5435
	1.5517
	1.5517
	1.5517
	1.5558
	1.5599
	1.5599
	1.56
	1.5763
	1.58
	1.58
	1.58
	1.5805
	1.5846
	1.5846
	1.5887
	1.5928
	1.6
	1.6051
	1.6051
	1.61
	1.61
	1.61
	1.6133
	1.6174
	1.6215
	1.6256
	1.6297
	1.6297
	1.63
	1.63
	1.6379
	1.6379
	1.6379
	1.6379
	1.64
	1.6543
	1.6667
	1.6667
	1.67
	1.67
	1.67
	1.6708
	1.68
	1.6872
	1.6872
	1.69
	1.6954
	1.6954
	1.6995
	1.7
	1.7
	1.7
	1.71
	1.72
	1.72
	1.7241
	1.73
	1.73
	1.75
	1.76
	1.7652
	1.7775
	1.78
	1.7816
	1.79
	1.7939
	1.798
	1.81
	1.8103
	1.82
	1.82
	1.83
	1.83
	1.8309
	1.84
	1.85
	1.85
	1.8514
	1.86
	1.8678
	1.87
	1.8719
	1.88
	1.88
	1.88
	1.8801
	1.89
	1.8965
	1.9
	1.9
	1.9
	1.9171
	1.9212
	1.9212
	1.93
	1.93
	1.93
	1.95
	1.95
	1.95
[truncated: 155 more rows]
