# Supplementary material for: A distributed residue network permits conformational binding specificity in a conserved family of actin remodelers
Source: eLife. 2021 Dec 2;10:e70601. doi: 10.7554/eLife.70601 (PMC8639148; doi:10.7554/eLife.70601)
Supplement: Figure 4—source data 1. [file elife-70601-fig4-data1.xlsx]

## Sheet: Read Me
Raw data for Figure 4C of A distributed residue network permits conformational binding specificity in a conserved family of actin remodelers
PCARE achieves paralog selectivity by stabilizing an ENAH EVH1 domain-specific conformation
Two separate BLI experiments were performed, and steady state analysis was performed for each curve at a given concentration of EVH1 to obtain values to fit a one-site specific to binding model in Prism to obtain KD's.
Steady state values are reported as the wavelength shift (response, nm) of the BLI experiment.

## Sheet: Figure 4C
Raw Data for WT EVL EVH1 against PCARE B is provided in Source Data - Figure 1
	EVL swapped
Concentration (μM)	Rep 1	Rep 2
5	0.4197	0.4229
2.5	0.3875	0.3888
1.25	0.3415	0.339
0.625	0.2854	0.2787
0.3125	0.2148	0.2094
0.15625	0.1422	0.1363
0.078	0.08584	0.082
0	0	0
Raw data for Figure 4C: BLI binding curve for EVL swapped against PCARE B
