# Supplementary material for: A distributed residue network permits conformational binding specificity in a conserved family of actin remodelers
Source: eLife. 2021 Dec 2;10:e70601. doi: 10.7554/eLife.70601 (PMC8639148; doi:10.7554/eLife.70601)
Supplement: Figure 5—source data 1. [file elife-70601-fig5-data1.xlsx]

## Sheet: Read Me
Raw data for Figure 5 of A distributed residue network permits conformational binding specificity in a conserved family of actin remodelers
Engineered peptides bind to the ENAH EVH1 domain with high affinity and specificity
2-3 separate BLI experiments were performed, and steady state analysis was performed for each curve at a given concentration of EVH1 to obtain values to fit a one-site specific binding model in Prism to obtain KD values.
Steady state values are reported as the wavelength shift (response, nm) of the BLI experiment.
Figure 5B: Data shown are the steady state values derived from BLI for ENAH WT EVH1 against specified peptides
Figure 5D: Data shown are steady state values derived from BLI for ENAH, VASP, and EVL EVH1 domains against PCARE-Dual
Figure Supplement 1: Data shown are steady state values derived from BLI for ENAH Y38E EVH1 domain against PCARE-Dual

## Sheet: Figure 5B
Raw data for ENAH EVH1 WT against PCARE B is provided in Source Data - Figure 1
	PCARE-Dual
Concentration (μM)	Rep 1	Rep 2
1	0.479	0.5037
0.5	0.4409	0.4704
0.25	0.3943	0.4273
0.125	0.3369	0.3709
0.0625	0.2619	0.2876
0.03125	0.1961	0.2307
0.015625	0.1189	0.1372
0	0	0
	ABI1-LPP
Concentration (μM)	Rep 1	Rep 2
5	0.4787	0.4808
2.5	0.401	0.3872
1.25	0.3275	0.3122
0.625	0.2545	0.2296
0.3125	0.174	0.1474
0.15625	0.1222	0.09028
0.078	0.07395	0.04472
0	0	0
	ABI1		LPP
Concentration (μM)	Rep 1	Rep 2	Rep 1	Rep 2
80	0.5178	0.5746	0.3487	0.4375
53.33	0.4841	0.5503	0.3287	0.4068
35.56	0.4603	0.5284	0.308	0.3831
23.7	0.4336	0.5042	0.2829	0.3632
15.8	0.3886	0.4675	0.2475	0.3319
10.53	0.359	0.4289	0.2197	0.3003
7.022	0.3236	0.3932	0.1904	0.2649
4.68	0.2941	0.3601	0.1665	0.2354
3.12	0.3162	0.2903	0.127	0.2948
2.08	0.2643	0.2444	0.09506	0.2339
1.39	0.2489	0.2062	0.07632	0.1882
0	0	0	0	0

## Sheet: Figure 5D
Raw Data for ENAH EVH1 WT against PCARE-Dual provided in this file under tab Figure 5B
	VASP		EVL
Concentration (μM)	Rep 1	Rep 2	Rep 1	Rep 2
80	0.4132	0.4288	0.4651	0.4931
60	0.3723	0.3869	0.4331	0.4485
30	0.2745	0.2947	0.3287	0.3625
15	0.1875	0.2038	0.2386	0.2638
7.5	0.1163	0.1263	0.155	0.1677
3.75	0.06526	0.07487	0.09308	0.1028
1.875	0.03642	0.04134	0.0498	0.05753
0	0	0	0	0

## Sheet: Figure Supplement 1
Raw Data for Figure 5 - figure supplement 1. Raw data for ENAH WT against PCARE Dual is provided in Source Data Figure 5B.
	ENAH Y38E against PCARE-Dual
Concentration (μM)	Rep 1	Rep 2	Rep 3
5	0.600315	0.613354	0.606578
2.5	0.568877	0.567693	0.559459
1.25	0.498599	0.502504	0.497703
0.625	0.401257	0.407511	0.398909
0.3125	0.291125	0.296264	0.288858
0.15625	0.195064	0.188496	0.186471
0.078125	0.109519	0.109006	0.110728
0.0390625	0.068077	0.06538	0.059007
0.0195312	0.03803	0.030771	0.03382
0.00976563	0.024801	0.025416	0.022363
0.00488281	0.016216	0.019884	0.017358
0	0	0	0
