# Supplementary material for: A distributed residue network permits conformational binding specificity in a conserved family of actin remodelers
Source: eLife. 2021 Dec 2;10:e70601. doi: 10.7554/eLife.70601 (PMC8639148; doi:10.7554/eLife.70601)
Supplement: Figure 5—source data 2. [file elife-70601-fig5-data2.xlsx]

## Sheet: Read Me
Raw data for Figure 5C of A distributed residue network permits conformational binding specificity in a conserved family of actin remodelers
Worksheets LPP, PCARE B, ABI1-LPP, PCARE-Dual are the BLI data for the BLI curves shown in figure 5C
Data are data collected from BLI runs for different ENAH EVH1 concentrations against biotinylated peptides. First column is the time in seconds, and every following column is the BLI signal at a specified concentration of ENAH EVH1. Signal is reported as the response signal in nm.
Worksheets LPP Diss curve rep1/2, PCARE B Diss curve rep 1/2, ABI1-LPP Diss curve rep 1/2, PCARE-Dual Diss curve rep 1/2 are the raw dissociation curves used to fit dissocation rate constants (1/s) in the table of figure 5C
Dissociation rate constants were globally fit in Prism for each replicate, and kdiss reported in table in figure 3C is the mean and standard deviation from both replicates. For each replicate, first column is time in seconds, and every following column is the BLI signal (response signal in nm) at a specified concentration of ENAH EVH1 domain.

## Sheet: LPP
	Concentration (uM)
Time (s)	80 uM	36 uM	16 uM	7 uM	3.1 uM	1.4 uM
510.02	0	0	0	0	0	0
510.22	0.35473	0.285324	0.221514	0.150702	0.0914912	0.0485995
510.42	0.374324	0.302544	0.237191	0.170266	0.111554	0.0601376
510.62	0.379509	0.302721	0.242089	0.17739	0.117902	0.0700187
510.82	0.382363	0.310214	0.244567	0.181838	0.125553	0.0715652
511.02	0.385445	0.31099	0.242558	0.182071	0.128166	0.0731425
511.22	0.388507	0.310257	0.245891	0.179988	0.126811	0.0770307
511.42	0.387276	0.311914	0.247971	0.183344	0.131454	0.072582
511.62	0.387214	0.312401	0.244236	0.184747	0.128226	0.074591
511.82	0.383892	0.314458	0.249084	0.184401	0.128665	0.0760812
512.02	0.387641	0.312815	0.245614	0.185992	0.129772	0.0734872
512.22	0.386328	0.309879	0.248	0.188206	0.129209	0.0722062
512.42	0.386833	0.311603	0.244924	0.185896	0.125748	0.0735143
512.62	0.386544	0.315006	0.247333	0.182414	0.129797	0.0747033
512.82	0.385332	0.313276	0.248773	0.182613	0.130144	0.0741892
513.02	0.38828	0.320048	0.24283	0.186847	0.129907	0.077951
513.22	0.386775	0.315747	0.246839	0.186299	0.131984	0.0741726
513.42	0.390648	0.317154	0.248688	0.183412	0.12873	0.0737269
513.62	0.387206	0.315818	0.248527	0.185224	0.129455	0.0740827
513.82	0.389925	0.312464	0.245596	0.188726	0.133402	0.077057
514.02	0.387286	0.311944	0.241438	0.189035	0.132262	0.074267
514.22	0.3859	0.317518	0.249428	0.186816	0.128795	0.0744226
514.42	0.387444	0.31523	0.25016	0.189085	0.131159	0.0773288
514.62	0.389211	0.316047	0.249606	0.187986	0.130416	0.0767485
514.82	0.387485	0.317898	0.249888	0.184667	0.128323	0.0771721
515.02	0.394953	0.319114	0.250095	0.189374	0.129801	0.0778741
515.22	0.391646	0.317645	0.246402	0.18968	0.133971	0.0791248
515.42	0.390439	0.313918	0.24335	0.190573	0.133573	0.0752842
515.62	0.390938	0.313962	0.248405	0.184048	0.13219	0.0751813
515.82	0.388091	0.319799	0.246767	0.190657	0.131033	0.0775626
516.02	0.389202	0.316274	0.248011	0.188931	0.136335	0.0764856
516.22	0.392182	0.318206	0.249055	0.189544	0.134198	0.0773019
516.42	0.389579	0.314854	0.250445	0.191609	0.132384	0.0769246
516.62	0.389168	0.317553	0.252069	0.191754	0.129554	0.0758264
516.82	0.388758	0.317652	0.252993	0.187597	0.134514	0.0771277
517.02	0.388807	0.31467	0.251354	0.188331	0.137005	0.079737
517.22	0.386534	0.31479	0.250151	0.188565	0.135353	0.0732105
517.42	0.390583	0.315579	0.249829	0.189478	0.134747	0.0793022
517.62	0.390579	0.314345	0.251292	0.187036	0.133099	0.0751412
517.82	0.390607	0.317638	0.247462	0.188117	0.135025	0.0765608
518.02	0.390586	0.31155	0.25369	0.189307	0.129973	0.0773688
518.22	0.385498	0.316764	0.250931	0.19091	0.133802	0.0794107
518.42	0.389834	0.313961	0.248262	0.189969	0.13249	0.0782116
518.62	0.389958	0.314466	0.248272	0.188545	0.134142	0.0767145
518.82	0.385128	0.314583	0.250574	0.194003	0.13417	0.0796596
519.02	0.385101	0.319034	0.254732	0.190782	0.134389	0.074861
519.22	0.389869	0.315417	0.251676	0.191664	0.134255	0.0774856
519.42	0.387873	0.315319	0.246702	0.19016	0.13452	0.0769521
519.62	0.389331	0.31558	0.249638	0.191594	0.134668	0.0766349
519.82	0.386959	0.314789	0.25458	0.192914	0.138255	0.0776187
520.02	0.391757	0.315769	0.251058	0.194138	0.131751	0.0771295
520.22	0.388962	0.317389	0.251066	0.189398	0.134138	0.0728133
520.42	0.386679	0.317519	0.250791	0.197922	0.133428	0.0802656
520.62	0.388395	0.317803	0.248939	0.187343	0.129759	0.0776014
520.82	0.388018	0.315494	0.247179	0.191417	0.13328	0.0776531
521.02	0.38769	0.31917	0.255111	0.195737	0.135307	0.0742087
521.22	0.390546	0.317709	0.252348	0.191941	0.132658	0.0806875
521.42	0.38698	0.314948	0.25245	0.189318	0.139478	0.0790051
521.62	0.387764	0.320329	0.250752	0.194411	0.136391	0.075857
521.82	0.389485	0.324715	0.251223	0.192358	0.129977	0.0749479
522.02	0.390188	0.315631	0.254333	0.192036	0.138074	0.0780852
522.22	0.389231	0.317374	0.252568	0.194073	0.13594	0.078945
522.42	0.391626	0.318421	0.251891	0.191514	0.129085	0.0787293
522.62	0.388407	0.314406	0.251943	0.188638	0.13942	0.0768571
522.82	0.387978	0.319581	0.254717	0.190844	0.135687	0.0771026
523.02	0.39072	0.316642	0.253282	0.194598	0.134361	0.0744565
523.22	0.386582	0.315145	0.249048	0.191244	0.134597	0.0737624
523.42	0.389782	0.317505	0.25765	0.191362	0.136989	0.0813176
523.62	0.389917	0.322658	0.253417	0.191568	0.134721	0.0757679
523.82	0.391187	0.318685	0.249864	0.193299	0.134192	0.0752048
524.02	0.391081	0.317514	0.252179	0.19303	0.131734	0.0765594
524.22	0.391479	0.316403	0.252868	0.191297	0.13454	0.0799344
524.42	0.39137	0.319262	0.25017	0.189939	0.136332	0.0746386
524.62	0.392174	0.319153	0.252326	0.193879	0.135094	0.0779704
524.82	0.393284	0.319573	0.253574	0.190503	0.13467	0.0824513
525.02	0.390168	0.320736	0.254608	0.194803	0.135398	0.0795285
525.22	0.389345	0.315781	0.250092	0.19387	0.135519	0.0774234
525.42	0.390176	0.317426	0.251646	0.191764	0.137659	0.0759371
525.62	0.392385	0.316962	0.250403	0.19374	0.133886	0.0773791
525.82	0.390903	0.317086	0.250382	0.191991	0.135285	0.0769252
526.02	0.395216	0.319599	0.252326	0.193917	0.135599	0.0753932
526.22	0.393949	0.316174	0.249988	0.190714	0.134425	0.0799918
526.42	0.39206	0.318717	0.250645	0.191806	0.136443	0.0754172
526.62	0.392574	0.3157	0.253606	0.193726	0.137962	0.0802305
526.82	0.387256	0.320482	0.252834	0.193795	0.134794	0.075966
527.02	0.387288	0.322576	0.252861	0.192477	0.136274	0.0831139
527.22	0.39219	0.317035	0.253121	0.19288	0.136	0.0779087
527.42	0.393151	0.318396	0.250359	0.192934	0.131357	0.0750241
527.62	0.391167	0.318994	0.254144	0.189468	0.134086	0.079384
527.82	0.392439	0.320552	0.25543	0.195498	0.136646	0.0785272
528.02	0.390099	0.317769	0.252395	0.19324	0.13673	0.0810895
528.22	0.393659	0.318964	0.253514	0.192207	0.13596	0.0787853
528.42	0.389674	0.31737	0.257864	0.194058	0.140809	0.0786436
528.62	0.390674	0.323968	0.25512	0.192725	0.132917	0.0789486
528.82	0.393492	0.318947	0.256744	0.195106	0.138868	0.077655
529.02	0.391316	0.319675	0.249531	0.192547	0.13669	0.0767904
529.22	0.39454	0.319512	0.254371	0.193753	0.134431	0.0798035
529.42	0.392104	0.32133	0.251413	0.191795	0.136678	0.077481
529.62	0.392033	0.317009	0.253375	0.194943	0.133151	0.0785976
529.82	0.392728	0.313606	0.255634	0.19523	0.134018	0.0793159
530.02	0.388327	0.32077	0.253925	0.196676	0.133559	0.0788181
530.22	0.393796	0.317245	0.253681	0.195898	0.136434	0.0740024
530.42	0.393622	0.323341	0.254892	0.191432	0.136366	0.082357
530.62	0.392447	0.318981	0.255232	0.191014	0.133392	0.0744486
530.82	0.392189	0.317619	0.256499	0.193516	0.135404	0.0773801
531.02	0.391641	0.318772	0.252713	0.19293	0.136607	0.0767444
531.22	0.39524	0.319987	0.250467	0.192522	0.134513	0.0813363
531.42	0.390953	0.318351	0.249799	0.192229	0.138122	0.080492
531.62	0.3927	0.317391	0.253479	0.195752	0.135061	0.0778194
531.82	0.396517	0.321485	0.253035	0.192382	0.135239	0.0794374
532.02	0.395214	0.319084	0.255488	0.195098	0.133689	0.0752332
532.22	0.392972	0.318825	0.25472	0.196247	0.139485	0.0784052
532.42	0.388749	0.319687	0.251065	0.195172	0.134628	0.0766944
532.62	0.391472	0.317735	0.254215	0.187449	0.139982	0.0767357
532.82	0.39309	0.318699	0.252768	0.194198	0.139839	0.080759
533.02	0.39074	0.319352	0.254105	0.195475	0.134544	0.0782063
533.22	0.390935	0.316017	0.248249	0.193899	0.137404	0.0794969
533.42	0.392744	0.317716	0.252546	0.197608	0.135636	0.0776414
533.62	0.389962	0.320745	0.254284	0.19485	0.136485	0.0772648
533.82	0.390004	0.316473	0.253801	0.192956	0.136656	0.0793419
534.02	0.393774	0.317858	0.25816	0.193694	0.141842	0.0774482
534.22	0.390972	0.318269	0.25158	0.192955	0.136353	0.0783254
534.42	0.388205	0.319358	0.254921	0.194973	0.137096	0.0791937
534.62	0.390522	0.321029	0.250879	0.195297	0.136046	0.074957
534.82	0.389336	0.319337	0.255882	0.195798	0.134517	0.0775736
535.02	0.393248	0.321029	0.252193	0.194948	0.133837	0.0790044
535.22	0.390778	0.311913	0.253292	0.194522	0.139402	0.0809196
535.42	0.393134	0.319421	0.253636	0.200084	0.138656	0.0784987
535.62	0.390742	0.319049	0.255437	0.192725	0.14027	0.0767455
535.82	0.389277	0.320578	0.251578	0.192093	0.13973	0.0796087
536.02	0.392907	0.32362	0.254012	0.19757	0.135425	0.0772262
536.22	0.389915	0.318976	0.250927	0.19264	0.13948	0.0743853
536.42	0.392112	0.320908	0.251502	0.195534	0.142542	0.0793686
536.62	0.39299	0.320151	0.256127	0.198156	0.136995	0.0782387
536.82	0.391401	0.320374	0.253716	0.194246	0.140914	0.0795226
537.02	0.389882	0.320704	0.256726	0.190334	0.134778	0.0772666
537.22	0.389951	0.320622	0.254226	0.192025	0.136173	0.0769383
537.42	0.386761	0.319209	0.254661	0.19543	0.134185	0.0802984
537.62	0.392997	0.317081	0.257654	0.193602	0.137485	0.0786573
537.82	0.390757	0.32201	0.250395	0.19341	0.139371	0.0808648
538.02	0.392842	0.318822	0.253642	0.192641	0.135391	0.0805962
538.22	0.391999	0.323694	0.253085	0.196326	0.137625	0.0796229
538.42	0.394422	0.322262	0.250849	0.19541	0.136772	0.0795651
538.62	0.391169	0.319001	0.251453	0.194822	0.138329	0.0797728
538.82	0.39272	0.317385	0.253646	0.195775	0.138033	0.0782111
539.02	0.392792	0.323219	0.253238	0.193543	0.138222	0.0831391
539.22	0.391917	0.320732	0.253844	0.195353	0.136942	0.0728238
539.42	0.39203	0.321128	0.254246	0.196683	0.139919	0.0788548
539.62	0.390028	0.321805	0.255898	0.196023	0.136973	0.0790378
539.82	0.390743	0.321063	0.256816	0.195342	0.138204	0.0789853
540.02	0.390743	0.321063	0.256816	0.195342	0.138204	0.0789853
540.22	0.275332	0.220188	0.148467	0.119029	0.0734046	0.0380272
540.42	0.200819	0.163109	0.10039	0.0823115	0.052814	0.0297079
540.62	0.131639	0.107003	0.0646792	0.05253	0.0429892	0.0182145
540.82	0.08904	0.0700279	0.043081	0.0377236	0.0324733	0.0173402
541.02	0.0572413	0.0442219	0.0283883	0.0290142	0.020698	0.0118833
541.22	0.0356431	0.0311248	0.0227435	0.0187001	0.0166289	0.00939796
541.42	0.0273881	0.0206811	0.0160477	0.0139473	0.0151639	0.00651049
541.62	0.022235	0.0152486	0.0136326	0.0114567	0.0150747	0.00467944
541.82	0.0178943	0.0142208	0.0103713	0.00958675	0.0117036	0.00152052
542.02	0.0126497	0.0157151	0.0110589	0.00788303	0.0117571	0.0021753
542.22	0.0135167	0.0140851	0.00989146	0.0111728	0.00995952	0.00084481
542.42	0.0139049	0.00782316	0.012228	0.00296129	0.00667683	0.00143305
542.62	0.0133386	0.0100053	0.00810632	0.00779597	0.00593223	0.00134383
542.82	0.011422	0.00886726	0.00857125	0.00517629	0.00810862	0.00037505
543.02	0.0118385	0.00956361	0.0130081	0.0120138	0.00861803	0.00533829
543.22	0.0128416	0.00922819	0.0108645	0.00946987	0.010916	0.00145785
543.42	0.0103366	0.00638759	0.00950477	0.0088808	0.00811122	-0.00139165
543.62	0.0126399	0.00932982	0.0101457	0.00586082	0.00488082	0.00109076
543.82	0.0130879	0.00772683	0.00901875	0.00648667	0.0048469	0.00203607
544.02	0.00748877	0.00533446	0.00779295	0.00769507	0.00370272	0.00052204
544.22	0.00688782	0.0123826	0.0123467	0.00803768	0.00530307	-0.0014708
544.42	0.00790789	0.00830593	0.00763211	0.00596242	0.00511198	0.00135842
544.62	0.00969467	0.00822231	0.00889483	0.00718347	0.00420298	0.00217783
544.82	0.0123203	0.010475	0.00575059	0.00894908	0.00580441	-0.00104159
545.02	0.0104663	0.00685512	0.00890263	0.00674856	0.00673563	0.00191111
545.22	0.0128669	0.00748849	0.00825007	0.00697599	0.00702453	0.00074656
545.42	0.00860211	0.00843837	0.00574025	0.00677218	0.00553402	0.00237903
545.62	0.0127514	0.00707442	0.00745803	0.00576338	0.00690878	0.00091637
545.82	0.0102659	0.00908389	0.00933528	0.00528203	0.00336331	-0.0021501
546.02	0.0121499	0.0107788	0.00837529	0.00802704	0.00329121	7.267e-05
546.22	0.0100907	0.00385429	0.00672578	0.00497225	0.00484462	-0.00060961
546.42	0.0127121	0.00629199	0.00742083	0.00576917	0.00966733	0.00341766
546.62	0.00873174	0.00605099	0.00749037	0.00379851	0.00763122	0.00378245
546.82	0.00860525	0.00610225	0.00764703	0.00479299	0.00280503	0.00244411
547.02	0.00925564	0.00585272	0.00563213	0.00598625	0.00421558	0.00087182
547.22	0.0133338	0.00713224	0.00670327	0.00904498	0.00552633	0.00363788
547.42	0.0125137	0.0053243	0.00290466	0.00722196	0.00592103	-0.00222809
547.62	0.0102972	0.00345428	0.00878058	0.0091351	0.00124024	-0.00279463
547.82	0.00900012	0.00437407	0.00887816	0.00571076	0.00496154	0.00142631
548.02	0.00887254	0.00838965	0.0081478	0.00519509	0.00855244	0.0053775
548.22	0.0138958	0.00470606	0.00799748	0.00468455	0.00423815	-5.905e-05
548.42	0.00705525	0.0117956	0.00831834	0.00200608	0.00558581	0.0012632
548.62	0.00976002	0.00974718	0.00360996	0.00613936	0.00270522	-0.0042844
548.82	0.0123606	0.00803875	0.00559389	0.0112158	0.00759098	0.00267329
549.02	0.00595287	0.00419935	0.00648391	0.00523181	0.00336161	0.00473361
549.22	0.00873426	0.00280135	0.00518706	0.00698559	0.00522853	0.00165227
549.42	0.00865889	0.00580372	0.00631611	0.00752662	0.00205172	-0.00213727
549.62	0.0122235	0.00065826	0.00544107	0.00581092	0.00466386	-0.00384919
549.82	0.00947155	0.00635928	0.00757362	0.00512985	0.00425702	0.00187428
550.02	0.0116301	0.00685525	0.00018921	0.00806155	0.00291182	-0.00155759
550.22	0.00678808	0.00686761	0.00621527	0.00565035	0.00344412	0.00057972
550.42	0.0064898	0.00547532	0.00675875	0.00543041	0.00279279	-0.00169883
550.62	0.00378789	0.00163694	0.00848154	0.00719804	0.00279542	-0.00013405
550.82	0.00851321	0.00604329	0.00639133	0.0045786	0.00403822	-0.00256411
551.02	0.00967519	0.00387168	0.00701984	0.00239545	0.00052765	-0.00050342
551.22	0.00941574	0.00569253	0.00575367	0.00513723	0.00188344	-0.00181909
551.42	0.00999499	0.00579655	0.00241446	0.00603069	0.00505752	-0.00541374
551.62	0.00981968	0.00328748	0.00621978	0.0053124	0.0035688	0.00139529
551.82	0.0099145	0.00513125	0.00448061	0.0020035	0.00426974	-0.00084959
552.02	0.00858955	0.00225014	0.00371688	0.0031602	0.00507034	6.434e-05
552.22	0.00918145	0.00487773	0.00345477	0.00465331	0.00274638	0.00052968
552.42	0.00864787	0.0035049	0.00679496	0.0067797	0.00701933	0.0007653
552.62	0.0107936	0.00463598	0.00358063	0.00386538	0.00489305	0.00122022
552.82	0.00771704	0.00572924	0.00157407	0.00205835	0.00604758	-8.863e-05
553.02	0.00787918	0.00570957	0.00962419	0.00082779	0.00536218	0.00199599
553.22	0.00618307	0.0051718	0.00354028	0.00268079	0.0056246	-0.00102531
553.42	0.0063662	0.00686571	0.00743671	0.00134014	0.00068442	-0.0009227
553.62	0.0103945	0.00311389	0.00496948	0.00492267	0.00348646	0.00264766
553.82	0.00645462	0.00021254	0.00582189	0.00210049	0.00319409	0.00186222
554.02	0.00931616	0.00566119	0.00287443	0.00326167	0.00191532	-0.00279681
554.22	0.00405177	0.00324671	0.00559603	0.00133928	0.00478336	-0.00073859
554.42	0.0086338	0.00586333	0.00287877	-0.00098848	0.00140606	-0.00189473
554.62	0.00567584	0.00752668	0.00213033	0.00487516	0.00068531	0.00159094
554.82	0.00597549	0.00083458	0.00592065	0.00355775	0.00147311	-0.00541747
555.02	0.00317522	0.00592224	0.00526152	-4.41e-05	0.00339998	-0.00184173
555.22	0.00900564	0.004344	0.00498542	0.00365232	0.00243924	-0.0004349
555.42	0.00600367	0.00557169	0.0056705	0.00101419	0.00089266	-0.00180669
555.62	0.00401766	0.00697775	0.00532783	0.00318088	0.00411898	0.00018587
555.82	0.00501815	0.00623309	0.00363543	0.00633339	0.00228376	-0.00061801
556.02	0.00746476	0.00477074	0.00197091	0.00586285	-0.00087573	0.00030051
556.22	0.00617138	0.00593174	0.00315267	0.00565466	0.00806593	-0.00555555
556.42	0.00362498	0.0070849	0.00650917	0.00092661	0.00311376	-0.00189546
556.62	0.00784763	0.00194608	0.00356382	0.0029924	0.0008832	-0.00180036
556.82	0.00744939	0.00569912	0.00497007	0.00527273	0.00493691	0.00048182
557.02	0.00670183	0.00465035	0.00174817	0.00199397	-0.00048139	-0.00270849
557.22	0.00496933	0.00658619	0.00400361	0.00555682	0.00068803	0.00161195
557.42	0.00291134	0.00371078	0.00457287	0.00595323	-0.00142581	0.00212628
557.62	0.00388003	0.00395683	0.00341014	0.00403426	0.00202679	0.0011664
557.82	0.00294419	0.00585879	-0.00077382	0.00073128	0.00501277	-0.00133606
558.02	-0.00030842	0.00195422	-0.00039059	0.00430207	0.00118733	0.00166988
558.22	0.00114666	0.0033731	0.0049266	0.00394387	0.00268155	0.00275234
558.42	0.00690338	0.00370375	0.00224187	0.00386338	0.00348886	-0.00384556
558.62	0.00617286	0.00040068	0.00216121	0.00487333	0.00135076	-0.00181345
558.82	0.00417461	0.0029884	0.00360455	0.00237616	0.00440645	0.00129525
559.02	0.00506709	0.00373372	0.00349462	0.00248677	-0.00015422	-0.00183504
559.22	0.00600344	0.00378075	0.00393253	0.00284324	0.00086404	-0.00237822
559.42	0.0069656	0.00629093	0.00370428	-0.00467782	0.00515482	-0.00510168
559.62	0.00564638	0.00534565	0.00477604	-0.00392	0.00189426	-0.00248034
559.82	0.00744018	0.00866044	0.00369916	0.00265274	0.00099918	0.00227917
560.02	0.00730857	0.00274437	0.00304019	-0.00317281	0.00123748	-0.00151661
560.22	0.00536718	0.00267415	0.00350156	0.00257987	0.00150088	-0.00414431
560.42	0.00708108	0.00064465	0.00629399	0.00359886	0.00296934	-0.00242028
560.62	0.00388348	0.00145737	0.00457378	0.00250253	4.854e-05	-0.0044192
560.82	0.0027521	0.0027094	0.00324451	0.00425155	0.00432255	-0.00070619
561.02	0.00662388	0.00130109	0.00434194	0.00194002	0.00223687	-0.00366613
561.22	0.0061348	0.00035713	0.00149792	0.00400033	0.00140256	0.0008279
561.42	0.00208232	0.00028163	0.00061256	0.00398116	6.715e-05	-0.00142315
561.62	0.00521861	0.00515818	0.0028256	0.00275982	0.00227567	-0.00121825
561.82	0.00537396	0.00320527	0.00239639	0.00348942	0.00196629	-0.00247323
562.02	0.00620512	0.00491335	0.00603313	0.00441	0.00149035	-0.00285256
562.22	0.00242799	0.00180406	0.00535961	0.00042049	0.00183183	-0.00401822
562.42	0.00465394	0.00282505	0.00078407	0.00333674	-0.00476932	-0.00164788
562.62	0.00633502	0.00167808	0.00340165	0.00276133	0.00026942	-0.00332901
562.82	0.00243085	0.00215329	0.00704055	-0.00056538	-0.00122436	-0.00280086
563.02	0.00286742	0.00260055	0.00155692	0.00088309	0.00222123	-0.0037294
563.22	0.00064511	-0.00190692	0.00344728	0.00136921	0.00346166	-0.00187834
563.42	0.00152023	-0.00242477	0.00225077	-0.00176	-0.00115292	0.00133919
563.62	0.00757114	0.00146281	0.00268182	0.00267054	-0.00048351	-0.00283459
563.82	0.0043046	0.00288508	8.215e-05	0.00229954	0.00230444	-0.00270089
564.02	0.00589746	-0.00246894	0.00178908	-0.002133	0.00016026	-0.0033354
564.22	0.00084778	0.00257235	0.00108087	0.00345749	0.00166437	-0.00337813
564.42	0.00194274	-0.00124556	0.00481571	0.00162033	-0.00080336	-0.00362575
564.62	0.00744136	0.00439625	0.00452462	0.003258	-0.00015824	-0.00554857
564.82	0.00626118	-0.00082493	0.00116363	0.00332947	0.00140683	-0.00616038
565.02	0.00770148	0.00268363	-0.00072144	-0.00065868	-0.0004776	0.00120959
565.22	0.00394083	-0.00165565	0.00314935	-0.00160259	-0.00196879	-0.00131013
565.42	0.00210636	-0.00075817	0.0059402	-0.00209088	-0.00193348	-0.00331477
565.62	0.00441573	0.00268773	0.00189876	0.00457626	-0.00069402	-0.00342415
565.82	0.00195483	0.00203525	-0.00123176	0.00380718	0.00266445	-0.00174975
566.02	0.00189056	-0.00191724	0.00617343	0.00235426	0.00091705	-0.00186737
566.22	0.00429531	0.00109131	0.00041672	-0.00166919	0.00072646	-0.00038188
566.42	0.00491443	-0.00213476	-0.00104643	0.00057582	0.00247033	-0.00036123
566.62	0.0034667	0.00207862	0.00142323	-0.00116611	0.00278573	-0.00280866
566.82	0.00232566	-0.0007079	0.00321239	0.00111867	0.00113308	-0.00283193
567.02	0.00356031	-0.00041086	0.0039368	0.00060804	0.00162274	-0.00530022
567.22	0.00193847	0.00281136	-0.00132317	0.00047483	-0.0012373	-0.00333758
567.42	0.00419589	-0.00392377	0.00199723	0.00294582	-0.00071779	-0.0015231
567.62	0.0051549	-0.00096007	0.00238897	0.00344323	-0.00402095	-0.00199196
567.82	0.00401503	0.00233596	-0.00169074	0.00362821	-0.00064883	-0.00206206
568.02	0.00702817	0.00146201	0.00066477	0.00332825	0.00111554	-0.00576988
568.22	0.00274898	0.00410997	0.0001253	0.00050791	-0.00161474	-0.00078374
568.42	0.00359692	0.00029071	0.00052897	0.00116859	2.118e-05	0.00259603
568.62	0.00148102	0.00059416	0.00071021	0.00337679	-0.00367769	-0.00566842
568.82	0.00399406	2.189e-05	0.00170583	0.00107021	-0.00480577	-0.00329889
569.02	0.00112017	-0.00075955	0.00341372	-0.00212628	0.00029083	-0.00433845
569.22	-0.00044858	-0.00195724	0.00093895	0.00028272	-0.00068524	-0.00305301
569.42	0.00337725	0.00025253	0.000758	0.00304824	-0.00027973	0.00054603
569.62	0.00513259	0.00351467	0.00020492	-0.00029527	-0.00061223	-0.00151232
569.82	0.00063648	5.145e-05	-0.00012132	0.00333604	-0.00178089	-0.00346809

## Sheet: PCARE B
	Concentration (uM)
Time (s)	2.5 uM	1.3 uM	0.63 uM	0.31 uM	0.16 uM	0.078 uM
233.23	0	0	0	0	0	0
233.43	0.133036	0.0604706	0.0360847	0.0206331	0.00483102	0.00729698
233.63	0.21415	0.108223	0.0556386	0.0351663	0.0144425	0.00911882
233.83	0.275923	0.145368	0.0780465	0.041606	0.0157425	0.00608569
234.03	0.330639	0.185256	0.100924	0.0543186	0.0219097	0.0138903
234.23	0.375509	0.210199	0.118775	0.0615336	0.0310575	0.0212055
234.43	0.399973	0.239688	0.137872	0.0730095	0.0343575	0.0159831
234.63	0.418872	0.268027	0.151044	0.0821393	0.0375663	0.020097
234.83	0.434137	0.293042	0.167492	0.091199	0.04249	0.0269569
235.03	0.436343	0.31023	0.184473	0.0973135	0.0457779	0.0239847
235.23	0.440606	0.326205	0.199253	0.10385	0.0497179	0.0285812
235.43	0.440972	0.340786	0.212514	0.116791	0.0543201	0.0328542
235.63	0.441577	0.349148	0.223218	0.117571	0.0588158	0.0353175
235.83	0.444278	0.364247	0.236421	0.130538	0.0647264	0.034713
236.03	0.445905	0.367658	0.245141	0.135464	0.0623595	0.0353605
236.23	0.445126	0.375048	0.255765	0.141066	0.0753503	0.0429743
236.43	0.446395	0.372958	0.263846	0.146602	0.0750219	0.0430786
236.63	0.449584	0.375049	0.27203	0.154507	0.0796996	0.0429195
236.83	0.444826	0.381364	0.280959	0.159777	0.082074	0.0460737
237.03	0.446507	0.382172	0.284352	0.168027	0.0864976	0.0510481
237.23	0.448511	0.38298	0.290816	0.171615	0.089714	0.0527224
237.43	0.448515	0.382114	0.291021	0.175266	0.0893194	0.0518055
237.63	0.444531	0.387272	0.296891	0.179489	0.0976284	0.0516745
237.83	0.44627	0.383584	0.305585	0.18925	0.0976763	0.0531498
238.03	0.450657	0.38149	0.306517	0.189785	0.0967642	0.0571727
238.23	0.446231	0.379695	0.313656	0.191545	0.103418	0.0598539
238.43	0.449436	0.384536	0.314738	0.196773	0.106785	0.060847
238.63	0.449381	0.381768	0.316565	0.20356	0.108424	0.063641
238.83	0.447596	0.385125	0.317366	0.204293	0.11491	0.0604625
239.03	0.44788	0.386563	0.318695	0.207871	0.114431	0.0664012
239.23	0.449134	0.384411	0.316764	0.210303	0.116233	0.0657689
239.43	0.446136	0.383092	0.318136	0.214142	0.117023	0.0664346
239.63	0.451542	0.384918	0.323466	0.216512	0.122435	0.0697553
239.83	0.446561	0.388396	0.327484	0.218816	0.12362	0.0654802
240.03	0.448882	0.388588	0.326656	0.221483	0.126396	0.0721714
240.23	0.44814	0.386811	0.328395	0.223067	0.127237	0.0714656
240.43	0.449409	0.386902	0.329811	0.223873	0.131605	0.0721332
240.63	0.451375	0.38655	0.328852	0.227035	0.131395	0.0744922
240.83	0.449494	0.384658	0.329976	0.228337	0.127356	0.0699197
241.03	0.451724	0.391182	0.327762	0.228934	0.13231	0.074792
241.23	0.451293	0.383627	0.332734	0.232086	0.133258	0.0764388
241.43	0.449973	0.388655	0.328402	0.232224	0.135547	0.0774804
241.63	0.447867	0.387615	0.329885	0.235674	0.138518	0.075292
241.83	0.450037	0.389502	0.335039	0.231551	0.134233	0.0809383
242.03	0.4521	0.387033	0.33089	0.234189	0.138952	0.0781925
242.23	0.451419	0.38996	0.335049	0.235586	0.142984	0.0795404
242.43	0.451347	0.385863	0.329967	0.23513	0.142012	0.0789363
242.63	0.453861	0.389565	0.330467	0.235008	0.144298	0.0837587
242.83	0.453301	0.386858	0.333317	0.241273	0.138512	0.0845683
243.03	0.452764	0.387843	0.334428	0.242393	0.141325	0.0852703
243.23	0.454515	0.386487	0.333108	0.23977	0.146194	0.0850377
243.43	0.452358	0.386643	0.328976	0.243898	0.14241	0.0839113
243.63	0.45134	0.387039	0.328252	0.247715	0.148568	0.0854309
243.83	0.452786	0.388256	0.328702	0.245736	0.14914	0.0870329
244.03	0.450341	0.387209	0.328681	0.239074	0.150114	0.0852057
244.23	0.452007	0.389746	0.334452	0.245745	0.147209	0.0876174
244.43	0.451479	0.390254	0.332023	0.243147	0.150805	0.0906493
244.63	0.456384	0.394777	0.332212	0.243896	0.154512	0.0846707
244.83	0.451981	0.389683	0.334882	0.240817	0.151589	0.0900285
245.03	0.453173	0.391106	0.330768	0.24137	0.150144	0.0894208
245.23	0.453309	0.392342	0.335726	0.24827	0.154381	0.0904662
245.43	0.452884	0.387563	0.336404	0.249393	0.155613	0.0935783
245.63	0.45284	0.393643	0.335154	0.248658	0.156406	0.0907106
245.83	0.450246	0.391488	0.333213	0.243687	0.15873	0.0910723
246.03	0.457447	0.392144	0.332437	0.247281	0.155023	0.0914001
246.23	0.454955	0.393075	0.329225	0.246575	0.154728	0.0944721
246.43	0.454267	0.393946	0.332527	0.245065	0.154572	0.0926946
246.63	0.453873	0.389687	0.332571	0.246078	0.155357	0.0955843
246.83	0.452585	0.395844	0.328516	0.248075	0.159631	0.0955364
247.03	0.459134	0.388661	0.332088	0.248299	0.158387	0.0930072
247.23	0.455338	0.393035	0.333214	0.248576	0.161302	0.0962015
247.43	0.453352	0.391303	0.330458	0.252347	0.161853	0.0934094
247.63	0.455318	0.38969	0.332205	0.247896	0.154759	0.0925367
247.83	0.453731	0.387022	0.335422	0.251196	0.158845	0.0988547
248.03	0.454985	0.386926	0.334719	0.24182	0.158768	0.0917876
248.23	0.458043	0.390979	0.33332	0.249988	0.160541	0.0959567
248.43	0.454116	0.389994	0.332749	0.246507	0.159958	0.095839
248.63	0.455064	0.390569	0.336218	0.25182	0.160361	0.0952631
248.83	0.45551	0.390494	0.333585	0.248042	0.157831	0.0965166
249.03	0.457414	0.393397	0.334819	0.25107	0.159703	0.0982899
249.23	0.455547	0.390068	0.333669	0.248753	0.159456	0.0999352
249.43	0.457635	0.393538	0.33491	0.251945	0.161654	0.099437
249.63	0.459152	0.393045	0.333352	0.248823	0.160156	0.102908
249.83	0.455318	0.389133	0.329476	0.247566	0.163398	0.100002
250.03	0.454811	0.389143	0.331717	0.248306	0.162006	0.095869
250.23	0.45896	0.397537	0.332433	0.249585	0.162361	0.0973111
250.43	0.45758	0.389109	0.333491	0.244153	0.164071	0.0973445
250.63	0.457995	0.392941	0.330278	0.248881	0.161608	0.0992441
250.83	0.461514	0.391533	0.330588	0.24658	0.158994	0.0982649
251.03	0.461953	0.394041	0.334237	0.248839	0.161538	0.0994546
251.23	0.457283	0.395318	0.336383	0.248468	0.161157	0.0951626
251.43	0.45872	0.39349	0.333582	0.24852	0.164232	0.0996515
251.63	0.455908	0.396116	0.337642	0.250363	0.162663	0.0963752
251.83	0.455837	0.395627	0.332738	0.248953	0.159742	0.0979347
252.03	0.458742	0.394802	0.332827	0.249249	0.16562	0.0959176
252.23	0.459389	0.396245	0.335251	0.24777	0.165418	0.0999295
252.43	0.459973	0.394151	0.332562	0.248338	0.165952	0.100489
252.63	0.454575	0.39636	0.334798	0.248781	0.164904	0.103483
252.83	0.459629	0.390877	0.33395	0.251031	0.161316	0.0954134
253.03	0.457328	0.391687	0.335099	0.250942	0.161117	0.100527
253.23	0.460406	0.391914	0.336924	0.250544	0.166762	0.0993007
253.43	0.456467	0.394418	0.331015	0.248162	0.158973	0.0986683
253.63	0.460666	0.39134	0.332025	0.247919	0.165829	0.0964038
253.83	0.459682	0.393956	0.335787	0.251746	0.168781	0.103232
254.03	0.464608	0.392096	0.33216	0.249058	0.16981	0.100003
254.23	0.460089	0.393417	0.335028	0.248426	0.168958	0.105498
254.43	0.461276	0.392655	0.33559	0.251397	0.163909	0.102033
254.63	0.458073	0.39342	0.335616	0.249657	0.166026	0.100218
254.83	0.458783	0.395731	0.337394	0.252403	0.162885	0.10033
255.03	0.460492	0.392644	0.336684	0.248076	0.168172	0.100822
255.23	0.459315	0.393114	0.335754	0.24893	0.161037	0.106497
255.43	0.459196	0.39252	0.335804	0.250682	0.161919	0.101495
255.63	0.459582	0.397105	0.334804	0.251815	0.160028	0.100778
255.83	0.464684	0.39374	0.33415	0.244392	0.161482	0.10217
256.03	0.465085	0.390173	0.333162	0.249347	0.164839	0.0979166
256.23	0.462246	0.393998	0.336293	0.247593	0.160175	0.107512
256.43	0.459605	0.39514	0.337539	0.253168	0.16513	0.101698
256.63	0.459836	0.394974	0.332872	0.248741	0.164564	0.103639
256.83	0.459067	0.396386	0.337954	0.248372	0.163597	0.102936
257.03	0.462631	0.394092	0.337734	0.250131	0.166209	0.103171
257.23	0.46549	0.397893	0.335621	0.247323	0.164538	0.0981298
257.43	0.459147	0.395751	0.338144	0.24756	0.164347	0.105579
257.63	0.462155	0.395755	0.336384	0.251821	0.163747	0.103575
257.83	0.4618	0.3985	0.335569	0.249178	0.166652	0.100083
258.03	0.460455	0.39526	0.336301	0.245127	0.161242	0.103185
258.23	0.463623	0.394716	0.336227	0.250503	0.163325	0.102696
258.43	0.464254	0.394595	0.336988	0.248441	0.167852	0.107627
258.63	0.461719	0.39477	0.335844	0.24668	0.163253	0.0988304
258.83	0.459944	0.395829	0.334089	0.247529	0.165908	0.0991386
259.03	0.461918	0.395107	0.336627	0.250649	0.165034	0.10394
259.23	0.465184	0.395469	0.339858	0.250147	0.163401	0.101789
259.43	0.459092	0.397727	0.33557	0.248507	0.167689	0.101378
259.63	0.461468	0.393149	0.33756	0.248486	0.161535	0.103486
259.83	0.464198	0.397949	0.336918	0.248591	0.163363	0.102905
260.03	0.462075	0.394112	0.336078	0.24763	0.163328	0.104396
260.23	0.465128	0.396661	0.335444	0.248606	0.163119	0.10315
260.43	0.460673	0.39562	0.336019	0.247825	0.163507	0.101663
260.63	0.462709	0.400205	0.336791	0.247631	0.165454	0.102924
260.83	0.462277	0.394446	0.337488	0.249536	0.16643	0.100354
261.03	0.463228	0.395574	0.339115	0.248231	0.168228	0.103011
261.23	0.465122	0.396019	0.335316	0.25043	0.162873	0.0969419
261.43	0.459829	0.393133	0.336418	0.249191	0.167377	0.105897
261.63	0.462372	0.394865	0.336696	0.247894	0.166	0.102637
261.83	0.46153	0.396293	0.330746	0.247254	0.16251	0.101535
262.03	0.462111	0.393532	0.334613	0.251887	0.162019	0.101597
262.23	0.465417	0.398624	0.336822	0.24888	0.16371	0.103522
262.43	0.464284	0.398774	0.335846	0.246463	0.165782	0.0994882
262.63	0.464702	0.397119	0.335622	0.247112	0.165516	0.0980748
262.83	0.465853	0.396219	0.33731	0.248619	0.166389	0.101094
263.03	0.464785	0.396879	0.338538	0.251209	0.168337	0.103716
263.23	0.464785	0.396879	0.338538	0.251209	0.168337	0.103716
263.42	0.413279	0.369062	0.320605	0.232857	0.157419	0.0934876
263.62	0.390109	0.344231	0.303419	0.223053	0.157861	0.0924067
263.82	0.365248	0.324	0.287965	0.219478	0.15259	0.0907022
264.02	0.346217	0.307416	0.277068	0.209486	0.147181	0.0880589
264.22	0.328502	0.291866	0.264058	0.203854	0.14463	0.0828395
264.42	0.313133	0.279552	0.25437	0.196077	0.137219	0.0833549
264.62	0.29955	0.269566	0.239772	0.188049	0.134683	0.0789103
264.82	0.2854	0.253307	0.232876	0.183871	0.13152	0.0769147
265.02	0.277223	0.245563	0.224386	0.177194	0.124976	0.0805274
265.22	0.266068	0.23436	0.217497	0.173323	0.124209	0.0736715
265.42	0.254927	0.227557	0.210115	0.165289	0.118892	0.0734407
265.62	0.243759	0.220281	0.199024	0.160571	0.114972	0.0709127
265.82	0.235928	0.20845	0.191948	0.160232	0.114025	0.0676701
266.02	0.230609	0.199369	0.187249	0.152993	0.112835	0.0678562
266.22	0.219857	0.194344	0.184481	0.15014	0.103301	0.0637951
266.42	0.214109	0.186751	0.175991	0.142412	0.103933	0.060234
266.62	0.208008	0.183035	0.168281	0.138088	0.100276	0.0595497
266.82	0.201245	0.176233	0.166794	0.131587	0.0974122	0.06088
267.02	0.19465	0.16874	0.162028	0.134031	0.10024	0.0526409
267.22	0.189137	0.167131	0.150961	0.128139	0.0899176	0.0594678
267.42	0.183798	0.159112	0.147761	0.124316	0.088255	0.0572173
267.62	0.178772	0.152753	0.144259	0.122988	0.0874189	0.0506127
267.82	0.17195	0.152206	0.143561	0.116915	0.078496	0.0511643
268.02	0.169483	0.143539	0.135589	0.110705	0.0804941	0.0490698
268.22	0.164797	0.14349	0.135061	0.107687	0.0798098	0.0465727
268.42	0.160026	0.134624	0.129596	0.108929	0.0757545	0.0460992
268.62	0.155786	0.129301	0.124023	0.104282	0.0733489	0.0479079
268.82	0.15193	0.127415	0.118486	0.0994036	0.0701383	0.0464227
269.02	0.146232	0.12387	0.11545	0.0979678	0.0731234	0.0459745
269.22	0.14341	0.120382	0.111261	0.0964558	0.0690395	0.0456486
269.42	0.139798	0.120089	0.113232	0.0955079	0.0694073	0.0422397
269.62	0.140114	0.112472	0.10617	0.0909523	0.061544	0.0431678
269.82	0.1308	0.111536	0.105998	0.0890763	0.0615938	0.0411804
270.02	0.12833	0.107576	0.10481	0.0862737	0.06038	0.0367433
270.22	0.125734	0.105382	0.0970899	0.0857658	0.0582182	0.0358913
270.42	0.124322	0.103256	0.0961916	0.0836461	0.0580501	0.0349936
270.62	0.119565	0.102251	0.0953564	0.082197	0.0557175	0.0374805
270.82	0.116646	0.0982005	0.0887471	0.0757004	0.0550353	0.0351659
271.02	0.118535	0.0967712	0.0915199	0.0797805	0.0557662	0.0323024
271.22	0.113716	0.0916786	0.0868849	0.0737007	0.0512198	0.0317143
271.42	0.111471	0.0902691	0.0831515	0.0690537	0.052875	0.0325356
271.62	0.106716	0.0843036	0.0801755	0.0717947	0.0479089	0.0323283
271.82	0.104359	0.084764	0.0795536	0.0667728	0.0460922	0.0313318
272.02	0.105323	0.0833825	0.0772137	0.0649161	0.046163	0.0311637
272.22	0.101901	0.0811612	0.0780872	0.0649148	0.0474935	0.0216201
272.42	0.0969469	0.0745325	0.0726255	0.0621501	0.0450766	0.027469
272.62	0.0951033	0.0757269	0.0716668	0.0656473	0.0412869	0.0279664
272.82	0.0923956	0.0723425	0.0716735	0.0586684	0.0421562	0.0248389
273.02	0.0960802	0.0718459	0.0684457	0.0550847	0.0384491	0.0265858
273.22	0.0900752	0.0718923	0.0690289	0.0563774	0.0386101	0.0280882
273.42	0.0876772	0.0659497	0.0650087	0.0551881	0.0372729	0.0221356
273.62	0.0844486	0.0673705	0.0626627	0.0538246	0.0369958	0.0197798
273.82	0.0831605	0.0680546	0.0587495	0.0510696	0.0376546	0.0210276
274.02	0.0809616	0.0633385	0.0594902	0.0510781	0.0360437	0.0213156
274.22	0.079592	0.0642457	0.0575386	0.0502066	0.0322973	0.0216673
274.42	0.0771048	0.0585959	0.0581255	0.0492229	0.0303108	0.0181053
274.62	0.0772409	0.0574875	0.0534817	0.0470144	0.0347382	0.0196832
274.82	0.0730019	0.0600155	0.0528681	0.0441079	0.0341738	0.0184595
275.02	0.0712996	0.055339	0.0509023	0.0409383	0.0330921	0.0183539
275.22	0.0738592	0.0542974	0.0485708	0.0441014	0.0308934	0.0180452
275.42	0.0757428	0.0525882	0.0450422	0.0410082	0.02774	0.0170884
275.62	0.0713112	0.051942	0.0532078	0.0393894	0.0270786	0.0168445
275.82	0.0694934	0.047998	0.0439415	0.0391118	0.0264536	0.0165402
276.02	0.064536	0.0482092	0.050425	0.0413413	0.0266974	0.0143595
276.22	0.0634098	0.0476791	0.0439995	0.035594	0.0237038	0.013141
276.42	0.0654846	0.0466273	0.0424198	0.0358822	0.025423	0.0138953
276.62	0.0616198	0.0435848	0.0471936	0.0330929	0.0213928	0.0101944
276.82	0.0618842	0.044849	0.0458378	0.034875	0.0253431	0.0131645
277.02	0.0619572	0.0433411	0.0438639	0.0317883	0.0224722	0.0130306
277.22	0.0592172	0.0389911	0.0388246	0.0341845	0.019705	0.0139181
277.42	0.0586643	0.0450894	0.0406253	0.0301574	0.0223543	0.012345
277.62	0.0587236	0.0386521	0.0353821	0.0321548	0.0188008	0.00886462
277.82	0.0557511	0.0387867	0.0362387	0.0308568	0.0218672	0.00795043
278.02	0.0538851	0.0372016	0.0318381	0.0275657	0.0196528	0.0116679
278.22	0.057306	0.0375236	0.0308412	0.0286369	0.0192277	0.00868664
278.42	0.0533072	0.0322294	0.0314987	0.0311091	0.017637	0.00916707
278.62	0.0505025	0.0351118	0.0341346	0.024098	0.0130508	0.0100186
278.82	0.0515885	0.0324485	0.0321007	0.0257237	0.0141054	0.00751004
279.02	0.0505159	0.0335257	0.0324851	0.0260553	0.016878	0.0100196
279.22	0.0463853	0.0301915	0.0290715	0.0259372	0.0179239	0.00497728
279.42	0.0461349	0.0347279	0.0275735	0.0224886	0.0121216	0.00767508
279.62	0.0505727	0.0345018	0.0284899	0.0209203	0.0141506	0.00701473
279.82	0.0461597	0.0328023	0.0249375	0.0206007	0.015171	0.0104345
280.02	0.0451737	0.03595	0.0262897	0.0234474	0.0159487	0.00539696
280.22	0.0481101	0.0306364	0.0264778	0.0216954	0.0110764	0.00448019
280.42	0.0488223	0.0299973	0.0239661	0.0172403	0.012399	0.00024165
280.62	0.0450738	0.0260413	0.0260479	0.0191518	0.00689227	0.00371845
280.82	0.042809	0.0267484	0.0243086	0.0187339	0.0120694	0.00330504
281.02	0.0407038	0.0274733	0.0215975	0.0188942	0.00956413	0.00441613
281.22	0.0423842	0.0263867	0.0262745	0.0172918	0.00809985	0.00656629
281.42	0.0420031	0.0260837	0.0210028	0.0188135	0.0105402	0.00336669
281.62	0.0342139	0.0285141	0.0240493	0.0184666	0.0092987	0.00229041
281.82	0.0423915	0.0251436	0.0184137	0.0135137	0.010241	-0.00025585
282.02	0.0414639	0.0244154	0.0206504	0.0134327	0.0093535	0.00403399
282.22	0.0347659	0.021052	0.0183118	0.0159602	0.00902791	0.00325799
282.42	0.0380406	0.0203252	0.0226	0.0153943	0.0078708	0.00175411
282.62	0.0344577	0.0235846	0.0213364	0.0130776	0.00494143	0.00228071
282.82	0.0375596	0.0236968	0.0171917	0.0183408	0.00578804	0.00096907
283.02	0.0369724	0.0221179	0.0213326	0.0148119	0.00583036	0.00259297
283.22	0.0371839	0.0189061	0.0149073	0.0137795	0.00491421	0.00095777
283.42	0.0338364	0.017362	0.0153781	0.00974601	0.0062784	0.00158734
283.62	0.0374145	0.0168036	0.0134279	0.0127823	0.00616665	0.00291497
283.82	0.031767	0.0146689	0.0169273	0.0137182	0.00743641	-0.00150948
284.02	0.0294105	0.0167166	0.0129578	0.00935761	0.00399189	-0.002778
284.22	0.0282402	0.0162609	0.0119416	0.00775414	0.00118574	0.00251954
284.42	0.0306654	0.0165167	0.016098	0.00945161	0.00454048	0.00484502
284.62	0.0343159	0.0178117	0.00997212	0.0109421	0.0005158	0.00090296
284.82	0.0319855	0.013937	0.016694	0.00604591	0.00424086	-0.003694
285.02	0.0324346	0.0151784	0.0165306	0.00764592	0.0039922	-0.00142466
285.22	0.0270026	0.0118944	0.0122147	0.00802434	1.755e-05	-0.00041998
285.42	0.0308101	0.0117483	0.0106239	0.00644159	0.0018878	-0.00412027
285.62	0.0294474	0.0125782	0.0114509	0.00262497	0.00313712	-0.00012507
285.82	0.031212	0.0117202	0.0136537	0.00544983	0.00141141	-0.00106809
286.02	0.0278458	0.0071157	0.00977433	0.00899759	0.00035978	-0.00398476
286.22	0.0287387	0.0131457	0.00982699	0.00561811	0.00555212	-0.0030404
286.42	0.0296099	0.00858631	0.00848264	0.00504541	0.0004733	-0.0036697
286.62	0.0281434	0.0130447	0.00875215	0.00652315	0.00192027	-0.00668647
286.82	0.0288181	0.013055	0.00543365	0.0104861	-0.00122236	-0.00893023
287.02	0.0240348	0.0136921	0.00604227	4.451e-05	0.00454775	-0.00155126
287.22	0.0254899	0.00642453	0.0100878	0.00171201	0.00082033	-0.010588
287.42	0.0238591	0.00895697	0.011564	0.00225707	-0.00171654	-0.00016223
287.62	0.0254936	0.00910811	0.00615899	0.00715718	0.00141727	-0.00250883
287.82	0.0237604	0.0103593	0.00521537	0.00388538	-0.00376084	-0.00517579
288.02	0.0232877	0.00810797	0.00731942	0.00312918	-0.00102832	-0.00054693
288.22	0.02421	0.0089127	0.00709836	0.00486806	-0.00345889	-0.00776148
288.42	0.0248014	0.00905385	0.00505929	0.000736	-1.268e-05	-0.0049187
288.62	0.0227707	0.00821465	0.00354082	-0.00158113	-0.00308924	-0.00606366
288.82	0.0174295	0.012247	0.0060379	-0.0014253	-0.00241033	-0.00558224
289.02	0.0207184	0.00777439	0.00586518	-0.00143511	-0.00192853	-0.00672736
289.22	0.0178266	0.00654746	0.00338648	0.00425537	-0.00182298	-0.00349417
289.42	0.0235068	0.00945159	0.0068378	-0.00024023	-0.00463314	-0.00658433
289.62	0.0201545	0.00808972	0.00452245	0.00106564	-0.00338233	-0.00869248
289.82	0.0224987	0.00833184	0.00284701	0.00126882	0.00126209	-0.00285651
290.02	0.0178274	0.00787164	0.00211087	0.00032813	-0.00133643	-0.00501432
290.22	0.0185568	0.00500978	0.00678047	0.00172406	-0.00117513	-0.00424882
290.42	0.0214644	0.00199603	0.00123537	0.00059612	-0.00495999	-0.00982668
290.62	0.0233384	0.00693366	0.0038818	0.00139465	-0.00517411	-0.0101173
290.82	0.0164379	0.00310807	0.00448512	-0.00091121	-0.00307956	-0.00655632
291.02	0.0164727	0.0059191	0.00455184	-0.00014635	-0.00413737	-0.00702246
291.22	0.0208458	0.00725085	0.00286664	-0.0006846	-0.00336145	-0.00511686
291.42	0.0211549	0.00602176	0.00179477	-0.00048518	-0.00828663	-0.00778806
291.62	0.0216153	0.00768675	0.00360271	-0.0018012	-0.00617799	-0.00829279
291.82	0.0174252	0.00409641	0.00701284	0.00074342	-0.00430355	-0.00422781
292.02	0.0189732	0.00809745	0.00145136	0.00163364	-0.00478606	-0.0116306
292.22	0.0164153	0.00520433	-0.00025007	-0.00103903	-0.00316399	-0.0095328
292.42	0.0190797	0.00241695	-0.0030134	-0.00174964	-0.00658607	-0.00760763
292.62	0.0179187	0.00461175	0.00176547	-0.0001377	-0.00307079	-0.00717766
292.82	0.0200992	0.00485053	0.00363983	-0.0044531	-0.00493218	-0.00964384
293.02	0.0185714	0.00642259	0.00292057	0.0001477	-0.00439474	-0.00767504
293.22	0.0161428	0.00271956	0.00158285	-0.00183047	-0.00729998	-0.0114076

## Sheet: ABI1-LPP
	Concentration (uM)
Time (s)	2.5 uM	1.3 uM	0.63 uM	0.31 uM	0.16 uM	0.078 uM
216.83	0	0	0	0	0	0
217.03	0.121461	0.0525931	0.0286445	0.0120572	0.00419283	-0.0061406
217.23	0.191317	0.0951397	0.0500452	0.0228702	0.0072759	-0.00262859
217.43	0.258077	0.133326	0.07184	0.0327415	0.0152645	0.00495201
217.63	0.295832	0.162488	0.089432	0.0434134	0.0200909	0.00363052
217.83	0.328587	0.193404	0.107218	0.0530435	0.0262298	0.00897142
218.03	0.346365	0.21784	0.120465	0.0584796	0.0321875	0.0110831
218.23	0.356338	0.237673	0.135025	0.0672243	0.0354317	0.0140887
218.43	0.366552	0.254284	0.150071	0.0759427	0.0388132	0.0147553
218.63	0.370319	0.266611	0.157552	0.0831552	0.0402143	0.0131099
218.83	0.372586	0.277208	0.167192	0.087566	0.0462546	0.0182278
219.03	0.375155	0.289516	0.177716	0.0927204	0.0488598	0.0194867
219.23	0.374336	0.290117	0.187293	0.100172	0.0527809	0.0230907
219.43	0.373969	0.292561	0.189424	0.102724	0.0557206	0.0215491
219.63	0.376182	0.29712	0.197582	0.108172	0.0581439	0.0240966
219.83	0.376114	0.298453	0.203586	0.109631	0.05635	0.0272618
220.03	0.379142	0.300025	0.205612	0.113635	0.0622477	0.0248038
220.23	0.379106	0.30307	0.207191	0.116233	0.0655661	0.0248944
220.43	0.378091	0.305612	0.209967	0.123071	0.068778	0.0310675
220.63	0.379741	0.303754	0.215853	0.121243	0.0700124	0.0300338
220.83	0.379756	0.302654	0.215998	0.125915	0.0711282	0.0310991
221.03	0.380928	0.305776	0.222358	0.129625	0.0753669	0.0332206
221.23	0.379323	0.307101	0.22055	0.130964	0.0757683	0.0334303
221.43	0.378571	0.303214	0.222634	0.134167	0.0771068	0.0366074
221.63	0.381938	0.303357	0.225867	0.132272	0.0771427	0.0377804
221.83	0.3795	0.309137	0.229004	0.135925	0.0802894	0.0333265
222.03	0.381365	0.303816	0.221824	0.136272	0.0811763	0.0405814
222.23	0.381328	0.308316	0.224364	0.138197	0.0789734	0.0374326
222.43	0.38181	0.305691	0.22678	0.13971	0.0795629	0.0361345
222.63	0.382775	0.308121	0.229097	0.139675	0.0796642	0.0364508
222.83	0.380667	0.307456	0.227513	0.140295	0.0815123	0.0395583
223.03	0.382636	0.307609	0.2296	0.144835	0.0878397	0.0376359
223.23	0.380599	0.307369	0.225015	0.14051	0.0808783	0.040737
223.43	0.381904	0.307648	0.223156	0.141231	0.0843688	0.0396836
223.63	0.383149	0.311874	0.229386	0.145836	0.0860564	0.0400583
223.83	0.380586	0.310218	0.229007	0.144315	0.0850197	0.0396909
224.03	0.381576	0.306617	0.228208	0.140083	0.0817791	0.0417613
224.23	0.384531	0.309373	0.227236	0.147506	0.0883417	0.0432074
224.43	0.381178	0.306581	0.230127	0.147728	0.0851258	0.0391418
224.63	0.386744	0.311107	0.229168	0.149553	0.0897165	0.0409535
224.83	0.380704	0.307854	0.229536	0.144557	0.0870986	0.0425838
225.03	0.38555	0.305509	0.228304	0.146578	0.089773	0.0415509
225.23	0.386569	0.308947	0.227619	0.145453	0.0878722	0.0407074
225.43	0.380487	0.310123	0.222984	0.144057	0.0873319	0.0400555
225.63	0.386447	0.311784	0.224878	0.146589	0.0845859	0.0462972
225.83	0.381773	0.31065	0.225834	0.14896	0.0876172	0.0421972
226.03	0.385384	0.305123	0.229794	0.150098	0.0910416	0.0427535
226.23	0.381173	0.312622	0.225916	0.146383	0.0849368	0.0486946
226.43	0.383626	0.311227	0.225235	0.147995	0.0885018	0.0427801
226.63	0.379953	0.312027	0.226318	0.146119	0.0898458	0.0450461
226.83	0.382501	0.306844	0.224493	0.145298	0.0873514	0.0483473
227.03	0.384911	0.307362	0.229367	0.144251	0.0917795	0.041071
227.23	0.387243	0.311821	0.22891	0.144622	0.0912957	0.0461731
227.43	0.385617	0.307556	0.22562	0.144402	0.0907589	0.0436324
227.63	0.383261	0.309034	0.230035	0.14492	0.0944578	0.046034
227.83	0.386686	0.312429	0.228871	0.150163	0.0915723	0.0427838
228.03	0.384795	0.307746	0.226902	0.145385	0.0925846	0.0435287
228.23	0.385614	0.311144	0.228386	0.14618	0.0888945	0.045823
228.43	0.384592	0.311053	0.227041	0.147972	0.0905333	0.044767
228.63	0.386551	0.309604	0.226081	0.14613	0.0921351	0.0501116
228.83	0.385659	0.312696	0.229306	0.144097	0.0915612	0.0420443
229.03	0.385314	0.311212	0.226383	0.146293	0.0910211	0.0434015
229.23	0.384748	0.310978	0.227861	0.148021	0.0910561	0.0456116
229.43	0.387072	0.309612	0.228928	0.146919	0.0893888	0.043357
229.63	0.386078	0.307342	0.228633	0.143431	0.0927073	0.0425961
229.83	0.387726	0.310335	0.226922	0.146278	0.0926252	0.0425379
230.03	0.384551	0.313244	0.226192	0.146161	0.0895638	0.0457036
230.23	0.384563	0.310604	0.226185	0.150316	0.0914484	0.0443902
230.43	0.3886	0.311265	0.230333	0.147268	0.0923127	0.0506332
230.63	0.386569	0.312527	0.229484	0.146774	0.0894043	0.044945
230.83	0.386249	0.30824	0.227056	0.144365	0.0890548	0.0465856
231.03	0.389181	0.312066	0.230826	0.145231	0.0910424	0.0431573
231.23	0.385109	0.311818	0.230559	0.148556	0.0908246	0.0450735
231.43	0.385945	0.309337	0.22718	0.148415	0.093361	0.0468247
231.63	0.385636	0.311205	0.227324	0.148889	0.0929937	0.0456045
231.83	0.383694	0.309348	0.228977	0.143254	0.0909449	0.0484954
232.03	0.386686	0.312483	0.229594	0.146	0.0903981	0.0457319
232.23	0.391663	0.309458	0.22837	0.148944	0.089959	0.0456167
232.43	0.387188	0.308513	0.228146	0.146258	0.091317	0.0448187
232.63	0.385925	0.316821	0.232921	0.147983	0.0889439	0.0469273
232.83	0.387977	0.312441	0.22527	0.147925	0.0880206	0.0414695
233.03	0.38586	0.311892	0.22647	0.147358	0.0951106	0.0480067
233.23	0.389128	0.310805	0.229855	0.146476	0.0913404	0.0467285
233.43	0.384184	0.309361	0.22654	0.147345	0.0902564	0.0440712
233.63	0.388641	0.312917	0.230991	0.153279	0.0902113	0.0427274
233.83	0.389192	0.312328	0.230236	0.147172	0.0923796	0.0446608
234.03	0.388864	0.314826	0.230819	0.14459	0.0898659	0.0426892
234.23	0.389572	0.311806	0.227543	0.14633	0.0921102	0.0470862
234.43	0.386665	0.311048	0.232097	0.147371	0.089245	0.0425405
234.63	0.388831	0.311939	0.229244	0.146216	0.0907536	0.0426616
234.83	0.387038	0.309383	0.23326	0.147169	0.0887789	0.0418993
235.03	0.388462	0.312004	0.230411	0.147838	0.0912633	0.0438767
235.23	0.387482	0.310748	0.231505	0.144691	0.0935551	0.0420803
235.43	0.388005	0.311339	0.228873	0.147375	0.0872327	0.0455961
235.63	0.389712	0.31217	0.225471	0.142738	0.0869095	0.043583
235.83	0.39043	0.309344	0.229924	0.145704	0.0882839	0.0490306
236.03	0.390977	0.315471	0.22744	0.149388	0.0872387	0.0443749
236.23	0.389648	0.311381	0.230416	0.149242	0.0921101	0.0438643
236.43	0.38979	0.309218	0.230402	0.152014	0.0911253	0.0479494
236.63	0.389401	0.314637	0.227722	0.147596	0.0875564	0.0415964
236.83	0.385958	0.316135	0.229567	0.148474	0.0950034	0.0427882
237.03	0.389282	0.315169	0.228904	0.147663	0.0897755	0.0437335
237.23	0.391054	0.31321	0.233025	0.147114	0.0886747	0.0424081
237.43	0.391753	0.316089	0.231171	0.145206	0.0919476	0.0428084
237.63	0.39062	0.314811	0.2296	0.147239	0.0889759	0.0428775
237.83	0.393032	0.315044	0.228598	0.149137	0.0909609	0.0445019
238.03	0.391414	0.31037	0.227027	0.14348	0.087868	0.0445937
238.23	0.390321	0.312611	0.228112	0.144981	0.0890691	0.0435248
238.43	0.391511	0.314488	0.228726	0.149794	0.0868313	0.0423345
238.63	0.39034	0.314262	0.227585	0.146155	0.090628	0.0441197
238.83	0.392117	0.312988	0.233508	0.148495	0.0909905	0.0451071
239.03	0.391607	0.310378	0.227717	0.148695	0.0894907	0.044072
239.23	0.390592	0.313554	0.229441	0.145364	0.0902839	0.0452009
239.43	0.39453	0.309942	0.23244	0.149808	0.0885678	0.0424569
239.63	0.388523	0.314558	0.231047	0.145804	0.0893711	0.045505
239.83	0.392145	0.314103	0.228474	0.147978	0.0912534	0.0437456
240.03	0.390823	0.314045	0.231377	0.146986	0.090774	0.0417432
240.23	0.388656	0.319043	0.230138	0.147246	0.0921524	0.0412228
240.43	0.388978	0.316963	0.230624	0.15042	0.0875607	0.0424501
240.63	0.39061	0.31119	0.234578	0.147922	0.0906174	0.0407867
240.83	0.390397	0.3135	0.230634	0.146846	0.0883706	0.0449532
241.03	0.394514	0.314265	0.230048	0.152904	0.0911642	0.0429713
241.23	0.390459	0.318495	0.232301	0.143883	0.0867582	0.0455705
241.43	0.389994	0.313694	0.231338	0.145032	0.0917979	0.0441844
241.63	0.391647	0.313581	0.229128	0.148031	0.0869518	0.0481396
241.83	0.394098	0.318249	0.228849	0.14537	0.0886332	0.0460942
242.03	0.392503	0.313647	0.230896	0.143346	0.092108	0.0459973
242.23	0.390539	0.312138	0.2288	0.14912	0.0883417	0.0435717
242.43	0.392424	0.316322	0.229738	0.140677	0.0853012	0.0458799
242.63	0.393255	0.315415	0.228458	0.15194	0.0910262	0.0451772
242.83	0.391272	0.315862	0.228128	0.147184	0.0913857	0.0420696
243.03	0.389775	0.318095	0.230747	0.147359	0.0876983	0.044502
243.23	0.391723	0.313452	0.23085	0.147525	0.0881322	0.0445362
243.43	0.392155	0.318232	0.230521	0.148679	0.084795	0.0439707
243.63	0.391107	0.315626	0.234101	0.149893	0.087619	0.0423813
243.83	0.391954	0.316323	0.231044	0.148151	0.091335	0.0451306
244.03	0.394242	0.317255	0.228152	0.145868	0.0912892	0.0455491
244.23	0.393162	0.320164	0.233738	0.147869	0.0921921	0.0491316
244.43	0.393544	0.320611	0.229795	0.145826	0.0859104	0.0451701
244.63	0.393603	0.316326	0.232361	0.146909	0.0899999	0.0457194
244.83	0.389623	0.312913	0.231204	0.146122	0.0898329	0.0428362
245.03	0.395629	0.313661	0.230036	0.146863	0.0883787	0.0424914
245.23	0.392925	0.316309	0.231961	0.147258	0.0904273	0.0438554
245.43	0.393378	0.316131	0.228661	0.1472	0.0892117	0.045079
245.63	0.395307	0.315577	0.23135	0.146094	0.0875418	0.041096
245.83	0.390909	0.312312	0.233842	0.14513	0.0860011	0.0443362
246.03	0.39501	0.314343	0.231365	0.138374	0.0868354	0.0427351
246.23	0.395152	0.313189	0.230912	0.147665	0.0867589	0.044102
246.43	0.391154	0.315653	0.227086	0.141333	0.0900237	0.0430896
246.63	0.390445	0.313828	0.229774	0.148405	0.0855228	0.0427698
246.83	0.391996	0.315926	0.230259	0.147924	0.089168	0.0416623
247.04	0.320371	0.280829	0.213006	0.139618	0.0827569	0.0371162
247.24	0.29299	0.253528	0.196519	0.131712	0.0774305	0.0341212
247.44	0.265808	0.236771	0.187141	0.122588	0.0789208	0.0370375
247.64	0.24317	0.217997	0.171475	0.117312	0.0702401	0.0361096
247.84	0.225424	0.199292	0.161892	0.109306	0.0657655	0.0349149
248.04	0.209076	0.184167	0.150777	0.103071	0.0596925	0.029132
248.24	0.193974	0.169921	0.138371	0.0938517	0.0600931	0.0289123
248.44	0.180872	0.163052	0.131162	0.0907929	0.0564401	0.0279349
248.64	0.166908	0.147155	0.124725	0.0827463	0.0511682	0.0268177
248.84	0.157691	0.138588	0.119215	0.0753775	0.0470886	0.02795
249.04	0.148832	0.133214	0.110667	0.0758284	0.0438029	0.0241898
249.24	0.138248	0.122577	0.103085	0.0687696	0.0451912	0.0218566
249.44	0.133643	0.113571	0.09438	0.0638503	0.0407883	0.0220621
249.64	0.124491	0.108212	0.0899296	0.0592373	0.0392715	0.0198679
249.84	0.117844	0.101662	0.0885421	0.0558491	0.0386289	0.0157991
250.04	0.110709	0.0983275	0.083794	0.0550537	0.0371232	0.0144865
250.24	0.106141	0.0906742	0.0762638	0.0523137	0.0317928	0.0167609
250.44	0.10072	0.0868519	0.0709496	0.0450997	0.0335274	0.0100467
250.64	0.0945885	0.080717	0.0707069	0.0441323	0.029141	0.0119572
250.84	0.0933597	0.0734931	0.0642755	0.0451719	0.0249454	0.0134622
251.04	0.0882522	0.0703427	0.0634811	0.0393903	0.0209322	0.00856692
251.24	0.0836723	0.0683769	0.0599365	0.0378665	0.0255369	0.0110319
251.44	0.0784842	0.0660444	0.0554761	0.0341309	0.0203094	0.00926961
251.64	0.0788178	0.0635044	0.0512468	0.0354041	0.0177985	0.0116049
251.84	0.075634	0.0597269	0.0508931	0.0295702	0.0183091	0.00839763
252.04	0.0708569	0.0544945	0.043797	0.0268967	0.0177227	0.00713619
252.24	0.0694714	0.0518275	0.0472453	0.0232522	0.0157198	0.00134456
252.44	0.0660449	0.0509692	0.041458	0.0262242	0.0172448	0.00612688
252.64	0.0611604	0.046122	0.0385422	0.0217817	0.0128714	0.00096832
252.84	0.0589619	0.0417568	0.0367907	0.0195723	0.0133327	0.00684552
253.04	0.0564998	0.0446132	0.0337126	0.0218739	0.0126306	0.00426804
253.24	0.0539019	0.039011	0.0354805	0.0191094	0.00847738	0.00241648
253.44	0.0522076	0.0395327	0.0351132	0.0206991	0.008797	0.00283265
253.64	0.0537901	0.0354898	0.0310473	0.0166517	0.00941669	0.00185854
253.84	0.0496305	0.0372672	0.0303603	0.0139855	0.00797278	0.00320764
254.04	0.0498522	0.0322852	0.0283751	0.0119117	0.00480109	0.00193189
254.24	0.0455494	0.0277918	0.0276475	0.0156964	0.00579502	1.29e-05
254.44	0.0431908	0.0254273	0.022989	0.0101169	0.00802803	0.00321518
254.64	0.0442594	0.0287944	0.0220292	0.0127253	0.00519968	0.00019782
254.84	0.0405068	0.0271776	0.0212283	0.0105905	0.00327665	-0.00183146
255.04	0.042041	0.0224672	0.019375	0.0085674	-0.00070418	0.00080716
255.24	0.0400245	0.0246782	0.0186272	0.0113602	0.00030253	-0.00142866
255.44	0.038247	0.0225612	0.0151708	0.00950068	0.00294058	-0.00051466
255.64	0.0394727	0.020583	0.0171853	0.0100026	-0.00076167	-0.00695691
255.84	0.0368292	0.0239343	0.019811	0.00705523	-9.898e-05	-0.00075075
256.04	0.0338765	0.0168985	0.0166124	0.00556915	-0.00115764	-0.00139733
256.24	0.0332345	0.0199815	0.0170263	0.00752028	0.00086671	-0.00661813
256.44	0.0354607	0.019029	0.0140163	0.00270089	-0.00137796	-0.00078586
256.64	0.0321365	0.016699	0.0132146	0.00231766	-0.00726448	-0.00658563
256.84	0.0322123	0.0193024	0.0122002	0.00040071	-0.00430632	-0.00026655
257.04	0.0300182	0.0129177	0.00992788	0.00128704	-0.00371867	-0.00307783
257.24	0.0304801	0.0161414	0.00918039	-0.00105543	-0.0048415	-0.00437714
257.44	0.0279962	0.00913534	0.00782243	-0.00019558	-0.0045453	-0.00497264
257.64	0.0279962	0.00826637	0.0111735	0.00123508	-0.00386697	-0.0112204
257.84	0.0293658	0.011815	0.00769098	0.00061566	-0.00289798	-0.0129714
258.04	0.0259763	0.0124137	0.00772985	-0.00104388	0.00088307	-0.003383
258.24	0.02612	0.0107145	0.00965746	0.00338548	-0.00537115	-0.00827898
258.44	0.0253814	0.0104306	0.00945628	-0.00258416	-0.00638232	-0.00375095
258.64	0.0267294	0.00741159	0.00545101	0.00250624	-0.00695652	-0.0097875
258.84	0.0238299	0.0100223	0.00815457	-0.00143993	-0.00689173	-0.00429865
259.04	0.0259314	0.00703539	0.00837705	-0.00298757	-0.00598582	-0.0100491
259.24	0.0197269	0.00906439	0.00167807	0.00182622	-0.00498313	-0.00363366
259.44	0.0227794	0.00775595	0.00406798	-0.00166137	-0.00969109	-0.00764064
259.64	0.0212194	0.00941484	0.00780793	-0.00320479	-0.00639385	-0.00967864
259.84	0.020833	0.0064086	0.00375528	-0.003094	-0.00704671	-0.0114238
260.04	0.0244149	0.00977028	0.00513207	-0.00187575	-0.00682222	-0.00376831
260.24	0.0197166	0.0101438	0.00235131	-0.0034796	-0.00914526	-0.00817975
260.44	0.0208618	0.00546689	0.00617006	-0.00034041	-0.00288898	-0.0088443
260.64	0.0189165	0.00664326	0.00068834	-0.00463859	-0.0038466	-0.0104826
260.84	0.0215944	0.00241643	0.00216091	-0.00493347	-0.00705703	-0.00796072
261.04	0.0200117	0.00658136	0.00172332	-0.0024734	-0.00781729	-0.00584542
261.24	0.0215982	0.00244089	0.00146347	-0.00433523	-0.00590672	-0.00955698
261.44	0.02118	0.00825619	-0.00072564	-0.00262737	-0.00912405	-0.00805197
261.64	0.0196353	0.00410367	0.00309523	-0.00304151	-0.00591707	-0.00929992
261.84	0.0182686	0.00532933	0.00433433	-0.00573294	-0.00941124	-0.00757748
262.04	0.0201378	0.00432023	-0.00140182	-0.00832636	-0.00879113	-0.00918401
262.24	0.0223022	0.00052836	0.00209873	-0.00469761	-0.0108094	-0.0114131
262.44	0.0166936	0.00326871	-0.00140481	-0.00730724	-0.00807885	-0.00912546
262.64	0.0174026	0.00272417	0.00207926	-0.00399202	-0.0105108	-0.00901766
262.84	0.0199249	0.00378151	0.00262531	-0.00552339	-0.0102805	-0.0104743
263.04	0.0157876	0.00325368	-2.426e-05	-0.00398879	-0.0118091	-0.0100457
263.24	0.0175358	9.734e-05	-2.164e-05	-0.00593994	-0.00971224	-0.00770152
263.44	0.0185829	-0.00130413	-0.00150039	-0.00653732	-0.0130051	-0.00817163
263.64	0.0159606	0.00069678	0.00053214	-0.00475327	-0.0119071	-0.00779639
263.84	0.0175245	0.00238384	-0.00100456	-0.00524864	-0.00717771	-0.0102211
264.04	0.0168263	0.00116141	-0.00130851	-0.00796135	-0.0084082	-0.00844317
264.24	0.0174673	0.00147757	-0.00183189	-0.0101986	-0.0099317	-0.0128507
264.44	0.0139388	0.0027729	-0.00159196	-0.00554677	-0.0122091	-0.012328
264.64	0.0174738	0.00248319	-0.00577157	-0.00897964	-0.0117688	-0.0115695
264.84	0.0217893	-0.0029146	-0.00035707	-0.00843865	-0.01043	-0.00977598
265.04	0.0176276	0.00013175	-0.00416043	-0.00674675	-0.0110921	-0.0109348
265.24	0.0142011	-0.00073279	-0.0043381	-0.00942503	-0.0105853	-0.00947551
265.44	0.0136122	-0.003726	-0.0031797	-0.0110994	-0.00818433	-0.00865601
265.64	0.0138032	0.00062598	-0.00348557	-0.00517007	-0.0125507	-0.0102143
265.84	0.014509	-0.00343424	-0.00196982	-0.00906629	-0.00973473	-0.0116797
266.04	0.0134125	-0.00286155	-0.00275169	-0.0105225	-0.0081684	-0.00905315
266.24	0.013576	-0.00432062	-0.00382419	-0.00695371	-0.00858492	-0.0122092
266.44	0.011064	-0.00102506	-0.0036745	-0.0116184	-0.00590322	-0.00863693
266.64	0.0143995	-0.00306226	-0.00315067	-0.0116046	-0.0124081	-0.00933037
266.84	0.0180137	-0.00098742	-0.00152763	-0.00896073	-0.0110986	-0.00939564
267.04	0.0153541	0.00041625	0.00217789	-0.00742707	-0.00738348	-0.0105251
267.24	0.0105983	-0.00323056	-0.00392715	-0.00819576	-0.0135272	-0.00995411
267.44	0.0141906	-0.0055116	-0.00410202	-0.00713073	-0.0133501	-0.010494
267.64	0.0143226	-0.00180014	-0.00038534	-0.00718022	-0.0114937	-0.00835723
267.84	0.0163403	-0.00234371	-0.00229925	-0.0127304	-0.0105858	-0.00896793
268.04	0.0128868	-0.00091606	0.00030311	-0.00663387	-0.00972582	-0.0113725
268.24	0.0162985	-0.00030445	-0.00140486	-0.0116678	-0.00775331	-0.0152032
268.44	0.0147162	0.00041127	-0.0041951	-0.00938397	-0.0101885	-0.0122954
268.64	0.0123447	-0.00449599	-0.00492147	-0.0101077	-0.0121678	-0.0166363
268.84	0.0125078	-0.00057156	-0.00194587	-0.0091857	-0.00690032	-0.0115531
269.04	0.0124768	-0.00374754	-0.00396074	-0.00895031	-0.0105368	-0.0112412
269.24	0.0121804	-0.00288456	7.2e-05	-0.00682212	-0.00869644	-0.00759099
269.44	0.0107254	0.00215138	-0.00329826	-0.00869051	-0.00927806	-0.0112664
269.64	0.0133925	-0.00175923	-0.00846225	-0.00956282	-0.0162948	-0.01192
269.84	0.0137	-0.00389363	-0.00521132	-0.00715416	-0.0157864	-0.0129419
270.04	0.0118551	0.00442248	-0.0037344	-0.00811766	-0.0126192	-0.0114078
270.24	0.0121521	-0.00363458	-0.00308057	-0.007626	-0.0116477	-0.0148882
270.44	0.015613	-0.00077282	-0.00477586	-0.0088409	-0.0138912	-0.0143524
270.64	0.0152548	0.00424676	-0.00414908	-0.00852681	-0.010469	-0.0171344
270.84	0.0101119	-0.0014857	-0.00357375	-0.0109019	-0.0110968	-0.0137952
271.04	0.0129748	-0.00167103	-0.00286936	-0.0128677	-0.0129275	-0.0132791
271.24	0.0162357	-0.00344489	-0.00417586	-0.0141953	-0.0151779	-0.00966039
271.44	0.0109888	-0.00255957	-0.00084063	-0.012491	-0.0153259	-0.0107788
271.64	0.00994952	-0.00437885	-0.00604438	-0.0125494	-0.0128933	-0.0149962
271.84	0.0112689	-0.0044642	-0.00477392	-0.0115968	-0.0119047	-0.0105499
272.04	0.0135809	-0.00012499	-0.00432659	-0.0152249	-0.0157432	-0.0146972
272.24	0.0123693	-0.00478208	-0.00657529	-0.0101907	-0.0141474	-0.0139081
272.44	0.012138	-0.00277204	-0.00276658	-0.00979228	-0.0112566	-0.0117011
272.64	0.0119036	-0.0069487	-0.00470666	-0.012774	-0.0138065	-0.009344
272.84	0.00956646	-0.0029282	-0.00342804	-0.00619365	-0.0123743	-0.0126233
273.04	0.0110027	-0.00219882	-0.00313834	-0.00979427	-0.011851	-0.0123751
273.24	0.0099054	-0.00208448	-0.00571263	-0.0123345	-0.0104703	-0.0120269
273.44	0.0110514	-0.00447122	-0.00738798	-0.0109869	-0.00950899	-0.0140931
273.64	0.00991708	-0.00539465	-0.00746181	-0.00694646	-0.0122549	-0.0110801
273.84	0.0111689	-0.0026667	-0.0016133	-0.0125316	-0.0135126	-0.00975265
274.04	0.012024	-0.00446015	-0.0046928	-0.00921442	-0.00980056	-0.0109489
274.24	0.0118466	-0.00412139	-0.00452013	-0.00886021	-0.0157535	-0.00982887
274.44	0.0106923	-0.00363263	-0.00324554	-0.0107513	-0.0166006	-0.0160804
274.64	0.0125248	-0.00475908	-0.00421314	-0.00928534	-0.011988	-0.0102287
274.84	0.0124718	-0.00190089	-0.00367522	-0.0087912	-0.0141743	-0.0128997
275.04	0.0144232	-0.00571607	-0.00370834	-0.0125659	-0.0126728	-0.0115222
275.24	0.0103021	-0.00270463	-0.00651393	-0.012553	-0.013725	-0.0105924
275.44	0.0108327	-0.0061322	-0.00688025	-0.0120403	-0.0164814	-0.0134783
275.64	0.00910857	-0.00329943	-0.00094767	-0.0101566	-0.0122667	-0.0109376
275.84	0.0117944	-0.00355273	-0.00655399	-0.0122793	-0.0162929	-0.0151246
276.04	0.0107973	-0.00474906	-0.00643274	-0.0109492	-0.00856649	-0.0136232
276.24	0.0136381	-0.00573803	-0.00295413	-0.00958269	-0.0135538	-0.00780781
276.44	0.0101008	-0.00546689	-0.00619098	-0.00919272	-0.015425	-0.0113159
276.64	0.0109127	-0.007198	-0.00765584	-0.0106177	-0.0123093	-0.0117611
276.84	0.00874601	-0.00493814	-0.00601377	-0.0112108	-0.0128561	-0.0108039

## Sheet: PCARE-Dual
	Concentration (uM)
Time (s)	0.5 uM	0.25 uM	0.063 uM	0.031 uM	0.016 uM	0.0078 uM
156.82	0	0	0	0	0	0
157.02	0.0303911	0.0194617	0.00791922	-0.00556738	-0.00919958	-0.00508536
157.22	0.0474169	0.024786	0.00785485	-0.00031919	-0.00171896	-0.00675447
157.42	0.0659512	0.0345831	0.0134645	0.00583797	-0.00210103	-0.00465584
157.62	0.0831181	0.044061	0.0220673	0.0100166	-0.00421877	-0.00729748
157.82	0.10025	0.052634	0.0270524	0.00652125	0.00164755	-0.00245044
158.02	0.119565	0.0634915	0.0291988	0.00910025	0.00087908	-0.00142861
158.22	0.140288	0.0737475	0.0390341	0.0156044	0.00117342	-0.00141395
158.42	0.157602	0.0792579	0.0431315	0.0160016	0.00189226	0.00065265
158.62	0.178083	0.0884819	0.0463291	0.0175185	0.00301164	-0.00086348
158.82	0.193837	0.0988476	0.0561422	0.0202171	0.00711077	-0.00024071
159.02	0.206206	0.106741	0.0561882	0.0261164	0.0076444	0.00102353
159.22	0.228259	0.114456	0.0592667	0.0223183	0.00750323	0.00307053
159.42	0.241041	0.122706	0.0684629	0.0322808	0.00776146	0.00276857
159.62	0.262275	0.134446	0.0712201	0.0291604	0.0106115	0.00446887
159.82	0.273032	0.143216	0.0744425	0.0327037	0.0121946	-0.00016532
160.02	0.28721	0.153077	0.0801341	0.0372699	0.014012	0.00454807
160.22	0.300779	0.158866	0.0846019	0.039899	0.0154741	0.00405685
160.42	0.320262	0.165514	0.0874969	0.0398847	0.019794	0.00474744
160.62	0.334339	0.180895	0.0952486	0.0415919	0.0178537	0.0059567
160.82	0.347311	0.185261	0.0988537	0.0449101	0.0183763	0.00662881
161.02	0.358432	0.194143	0.10453	0.0447943	0.0194953	0.00929512
161.22	0.370476	0.204127	0.105057	0.052298	0.0210382	0.00868431
161.42	0.379574	0.207831	0.109649	0.0535449	0.0205849	0.0067883
161.62	0.386861	0.217696	0.118106	0.054738	0.023925	0.00972893
161.82	0.401471	0.222613	0.121546	0.0568687	0.026335	0.00769458
162.02	0.413983	0.233289	0.122456	0.0573442	0.0203572	0.0130753
162.22	0.417575	0.236283	0.129984	0.064387	0.0294282	0.0100106
162.42	0.426912	0.246084	0.133026	0.0623553	0.0425349	0.013699
162.62	0.431304	0.25435	0.136452	0.0658735	0.0272421	0.0118731
162.82	0.438642	0.25858	0.140669	0.0685476	0.0310002	0.0125375
163.02	0.439262	0.26911	0.145811	0.0705602	0.0308296	0.0108205
163.22	0.443097	0.274552	0.153899	0.0696294	0.0357021	0.0168429
163.42	0.449661	0.282518	0.153483	0.0723978	0.0368955	0.0175507
163.62	0.45124	0.28923	0.154431	0.0739661	0.0374295	0.0154336
163.82	0.452669	0.295379	0.166691	0.0784935	0.0318025	0.0124432
164.02	0.453487	0.301198	0.161349	0.0794174	0.0342595	0.0162813
164.22	0.456549	0.305248	0.170935	0.0789191	0.0363466	0.0132014
164.42	0.45367	0.311379	0.175493	0.0876203	0.0389951	0.0168316
164.62	0.456235	0.317659	0.17711	0.0881912	0.0409684	0.0163235
164.82	0.459957	0.322908	0.181596	0.087658	0.0366098	0.0201499
165.02	0.462936	0.33011	0.184558	0.0888214	0.0439851	0.0213686
165.22	0.462744	0.333309	0.186963	0.0915289	0.0413055	0.0196868
165.42	0.458599	0.337208	0.191663	0.0958513	0.0410338	0.0193332
165.62	0.455825	0.341419	0.194282	0.0933089	0.0454979	0.020606
165.82	0.463274	0.350393	0.199622	0.0971916	0.0495238	0.0221707
166.02	0.462185	0.351695	0.198006	0.0970408	0.0462615	0.0231005
166.22	0.460993	0.36026	0.200027	0.101734	0.0497246	0.0217342
166.42	0.461274	0.35874	0.205399	0.108031	0.0520638	0.024602
166.62	0.457632	0.363211	0.209108	0.106853	0.0489657	0.0269955
166.82	0.461613	0.369668	0.213364	0.110938	0.054656	0.0260849
167.02	0.46045	0.375141	0.221373	0.10996	0.0517631	0.0230585
167.22	0.461919	0.375023	0.226023	0.108152	0.0560488	0.0227014
167.42	0.460119	0.381931	0.228018	0.114199	0.0506031	0.0290845
167.62	0.460097	0.37708	0.228711	0.114935	0.0545178	0.0239825
167.82	0.464626	0.383923	0.230038	0.114481	0.0558423	0.0244069
168.02	0.46514	0.387564	0.235644	0.119875	0.0605871	0.0278591
168.22	0.465299	0.390224	0.234884	0.122281	0.0559868	0.0258959
168.42	0.464859	0.39088	0.243501	0.119086	0.0589833	0.0264872
168.62	0.465748	0.396354	0.244499	0.126735	0.0619269	0.0280108
168.82	0.465466	0.394858	0.246083	0.122272	0.0599578	0.0296063
169.02	0.46597	0.397172	0.250791	0.127229	0.0635786	0.0322898
169.22	0.465096	0.401474	0.254835	0.125928	0.0615632	0.034411
169.42	0.465742	0.402279	0.255105	0.128486	0.0611641	0.031879
169.62	0.460446	0.400846	0.258919	0.130845	0.060515	0.030545
169.82	0.460415	0.402732	0.261954	0.133612	0.0645738	0.0362949
170.02	0.461116	0.402121	0.26713	0.13875	0.0705797	0.0349983
170.22	0.467495	0.40486	0.265621	0.138633	0.0687099	0.0291589
170.42	0.467165	0.407321	0.270034	0.142083	0.0687281	0.0322859
170.62	0.465494	0.407738	0.270277	0.140346	0.0703475	0.0315749
170.82	0.46809	0.408151	0.274079	0.143488	0.0715516	0.031998
171.02	0.468408	0.410059	0.27763	0.145627	0.0746531	0.0346264
171.22	0.465095	0.40832	0.279289	0.14551	0.073192	0.0364745
171.42	0.46569	0.410118	0.27778	0.147235	0.0721795	0.0358936
171.62	0.467728	0.40981	0.283573	0.149749	0.0747956	0.0331824
171.82	0.46945	0.416593	0.287179	0.151863	0.0757158	0.0409273
172.02	0.468444	0.415725	0.290551	0.153893	0.0770121	0.037684
172.22	0.469501	0.411592	0.291307	0.150628	0.0786193	0.0362299
172.42	0.466567	0.412975	0.293141	0.157018	0.0782137	0.0396145
172.62	0.470203	0.41196	0.292887	0.15548	0.076415	0.037989
172.82	0.469218	0.415972	0.295957	0.153135	0.0790284	0.0373557
173.02	0.469007	0.413057	0.300729	0.159735	0.0767753	0.0432389
173.22	0.467548	0.416285	0.300828	0.160446	0.0806815	0.0408479
173.42	0.469533	0.414707	0.298886	0.163692	0.0849175	0.0394349
173.62	0.469906	0.415803	0.30032	0.161746	0.0821453	0.0414476
173.82	0.471412	0.418356	0.303886	0.163064	0.0861496	0.0405501
174.02	0.468264	0.417778	0.306837	0.1653	0.0883024	0.0462651
174.22	0.467359	0.41907	0.307647	0.170062	0.082618	0.0423333
174.42	0.473109	0.419232	0.307654	0.170391	0.0921149	0.0443574
174.62	0.470908	0.42038	0.311437	0.170466	0.0930432	0.0446177
174.82	0.470399	0.41529	0.311356	0.172999	0.0878697	0.0451455
175.02	0.46932	0.418595	0.314159	0.172988	0.0919733	0.0455657
175.22	0.470542	0.421509	0.316155	0.176716	0.088733	0.0445062
175.42	0.468697	0.419274	0.320025	0.175133	0.0900172	0.0431433
175.62	0.473211	0.414404	0.319742	0.177232	0.0937953	0.0426536
175.82	0.471564	0.421246	0.322232	0.181204	0.0919618	0.0437877
176.02	0.468285	0.420988	0.322358	0.176063	0.0943116	0.044351
176.22	0.469815	0.416948	0.321234	0.177679	0.0963346	0.0503526
176.42	0.473021	0.422815	0.328163	0.183462	0.0940957	0.0504492
176.62	0.471808	0.421531	0.324977	0.177849	0.0971109	0.0492277
176.82	0.471268	0.417445	0.327472	0.182559	0.0969588	0.0449788
177.02	0.472311	0.41852	0.325843	0.183468	0.10026	0.0485754
177.22	0.473245	0.425596	0.329854	0.184	0.0998739	0.0469277
177.42	0.473792	0.422698	0.32828	0.189453	0.101288	0.0466789
177.62	0.471302	0.42385	0.331718	0.187076	0.104311	0.0486033
177.82	0.469898	0.420212	0.328625	0.192357	0.104286	0.0497325
178.02	0.474599	0.419709	0.331682	0.192808	0.10121	0.0518274
178.22	0.474678	0.41954	0.329967	0.191969	0.10159	0.0489565
178.42	0.47084	0.421637	0.334688	0.195441	0.103322	0.0534629
178.62	0.47385	0.421605	0.333516	0.194827	0.10514	0.0492549
178.82	0.470893	0.420674	0.333596	0.195703	0.107891	0.0488711
179.02	0.473081	0.420184	0.333716	0.198559	0.106729	0.0520254
179.22	0.475484	0.419807	0.336763	0.199952	0.107363	0.0516564
179.42	0.473726	0.423138	0.336639	0.199003	0.11341	0.0529644
179.62	0.472403	0.423337	0.341619	0.202674	0.110213	0.0507826
179.82	0.473543	0.421865	0.338648	0.201138	0.110864	0.0524831
180.02	0.472957	0.41722	0.338621	0.201003	0.111013	0.055382
180.22	0.474398	0.423311	0.340417	0.201429	0.109275	0.0535522
180.42	0.475902	0.425454	0.342701	0.201968	0.108358	0.0551259
180.62	0.473145	0.423918	0.342354	0.20469	0.111744	0.0506151
180.82	0.473022	0.422799	0.343746	0.205457	0.111353	0.0526177
181.02	0.47482	0.423158	0.342878	0.205569	0.113759	0.0580622
181.22	0.467803	0.423772	0.34313	0.20422	0.116578	0.0542626
181.42	0.475683	0.426637	0.346601	0.20694	0.108446	0.0580529
181.62	0.474607	0.424056	0.346416	0.211218	0.117419	0.0552878
181.82	0.475185	0.428352	0.337651	0.208491	0.113896	0.0592687
182.02	0.476067	0.425031	0.342484	0.211641	0.113708	0.0582788
182.22	0.475093	0.424916	0.348415	0.2127	0.116733	0.0534514
182.42	0.474262	0.422819	0.344916	0.214006	0.112432	0.0616591
182.62	0.471104	0.419935	0.348476	0.213081	0.117859	0.0605633
182.82	0.4751	0.426406	0.344826	0.217547	0.117415	0.056957
183.02	0.473598	0.424332	0.348097	0.218733	0.119102	0.0630107
183.22	0.474731	0.423701	0.351668	0.215459	0.121816	0.0562817
183.42	0.475552	0.424091	0.349717	0.216965	0.123404	0.0567134
183.62	0.477702	0.419467	0.349654	0.219875	0.122458	0.0601825
183.82	0.479471	0.423576	0.351799	0.216956	0.118618	0.061218
184.02	0.474847	0.425135	0.352609	0.222761	0.127308	0.0569427
184.22	0.475032	0.420311	0.349143	0.217759	0.119844	0.0604188
184.42	0.478297	0.423749	0.349864	0.221408	0.124073	0.0608801
184.62	0.47594	0.426374	0.351299	0.222755	0.122834	0.0619487
184.82	0.476491	0.426045	0.348258	0.223768	0.124556	0.0631772
185.02	0.472004	0.422911	0.350753	0.222327	0.125928	0.0603056
185.22	0.47749	0.42515	0.351204	0.22402	0.124857	0.063769
185.42	0.478239	0.425474	0.352975	0.225253	0.126055	0.0653316
185.62	0.473942	0.423766	0.349786	0.220388	0.131224	0.0635604
185.82	0.47741	0.424441	0.35124	0.224821	0.127709	0.0680862
186.02	0.473765	0.425536	0.352438	0.226876	0.129124	0.0645051
186.22	0.477244	0.42391	0.352109	0.225253	0.131294	0.0671118
186.42	0.474809	0.423351	0.353611	0.228908	0.130709	0.0648926
186.62	0.475248	0.427495	0.353093	0.22774	0.125539	0.0657302
186.82	0.477998	0.427732	0.353061	0.229022	0.132646	0.0673329
187.02	0.480461	0.426591	0.353427	0.233089	0.132011	0.0678206
187.22	0.479349	0.424622	0.356496	0.230327	0.135479	0.0650354
187.42	0.477166	0.42378	0.349572	0.227518	0.130719	0.0646752
187.62	0.477337	0.422706	0.359083	0.233154	0.130991	0.0644081
187.82	0.476624	0.424145	0.354916	0.230386	0.133854	0.06672
188.02	0.48115	0.428016	0.354918	0.231014	0.132898	0.0717767
188.22	0.478402	0.428157	0.356976	0.235921	0.134222	0.0705126
188.42	0.476405	0.426057	0.35315	0.234292	0.131519	0.0700363
188.62	0.476922	0.427859	0.350796	0.233699	0.136363	0.0693731
188.82	0.477764	0.427924	0.349919	0.233097	0.134684	0.0696868
189.02	0.477693	0.426242	0.355825	0.236673	0.134933	0.0696094
189.22	0.480195	0.427771	0.357076	0.235381	0.137456	0.0680938
189.42	0.476848	0.424788	0.359088	0.236464	0.140969	0.0724918
189.62	0.477901	0.426892	0.357385	0.236193	0.145724	0.0719981
189.82	0.477575	0.431797	0.353573	0.23628	0.14222	0.0697795
190.02	0.478844	0.427118	0.358302	0.238863	0.138864	0.0693564
190.22	0.479886	0.427418	0.357309	0.236687	0.141846	0.0732242
190.42	0.477491	0.429586	0.360061	0.237289	0.140504	0.073995
190.62	0.479056	0.428853	0.356715	0.237869	0.140776	0.0720411
190.82	0.478314	0.428586	0.356633	0.239185	0.13594	0.0762919
191.02	0.481016	0.431923	0.357391	0.237314	0.144842	0.0761084
191.22	0.477177	0.427128	0.35561	0.243341	0.141758	0.0734559
191.42	0.480908	0.428784	0.359836	0.241763	0.14053	0.0713209
191.62	0.48487	0.430412	0.358805	0.243798	0.141612	0.0761428
191.82	0.479694	0.42735	0.356874	0.240604	0.143704	0.073887
192.02	0.477383	0.431262	0.360111	0.242055	0.146518	0.0781389
192.22	0.479712	0.428464	0.360041	0.243739	0.145065	0.0766265
192.42	0.47688	0.42711	0.355599	0.241853	0.145109	0.0753898
192.62	0.477132	0.427312	0.355481	0.242424	0.147338	0.0752755
192.82	0.480493	0.429239	0.357984	0.244049	0.145867	0.0763489
193.02	0.479973	0.428847	0.359431	0.245188	0.147309	0.0762939
193.22	0.480309	0.428065	0.359879	0.243728	0.151938	0.0758323
193.42	0.47887	0.428165	0.358088	0.248832	0.145816	0.0733034
193.62	0.479398	0.426337	0.358186	0.242838	0.150006	0.0749678
193.82	0.481371	0.428998	0.357915	0.249574	0.148613	0.0794405
194.02	0.476679	0.427403	0.361837	0.247421	0.144527	0.0804108
194.22	0.480927	0.429845	0.35773	0.247714	0.151137	0.0774514
194.42	0.485677	0.428894	0.359175	0.24854	0.147952	0.0808505
194.62	0.480639	0.428586	0.355977	0.244891	0.150783	0.0760486
194.82	0.480303	0.429836	0.361044	0.249102	0.149983	0.0767246
195.02	0.481634	0.430824	0.357956	0.246914	0.149442	0.0788839
195.22	0.481261	0.431258	0.358093	0.247929	0.152856	0.0771128
195.42	0.480541	0.425598	0.361366	0.25067	0.15245	0.0768111
195.62	0.481344	0.427731	0.3584	0.248541	0.148847	0.0783554
195.82	0.476206	0.431733	0.358245	0.249934	0.15284	0.0762107
196.02	0.480618	0.433807	0.359638	0.247549	0.155893	0.0791756
196.22	0.482066	0.429593	0.354263	0.252722	0.156406	0.0808443
196.42	0.481486	0.433792	0.363723	0.252469	0.154102	0.0775332
196.62	0.480144	0.431517	0.358809	0.249244	0.151317	0.0793907
196.82	0.478651	0.43178	0.358205	0.25461	0.151176	0.078568
197.02	0.480854	0.431346	0.358946	0.252754	0.156988	0.0788693
197.22	0.482366	0.429845	0.362966	0.250706	0.155164	0.079191
197.42	0.482396	0.430845	0.358685	0.254726	0.153636	0.0833991
197.62	0.479039	0.427853	0.365242	0.253266	0.157288	0.0824995
197.82	0.481295	0.431326	0.356902	0.253871	0.157555	0.0825254
198.02	0.480715	0.429922	0.360059	0.249637	0.159933	0.0830033
198.22	0.480331	0.433205	0.365055	0.252519	0.156176	0.0803168
198.42	0.484112	0.430615	0.362898	0.252434	0.157486	0.0822878
198.62	0.478607	0.432424	0.361928	0.251392	0.158389	0.0812624
198.82	0.479775	0.432579	0.35928	0.257711	0.159443	0.0826691
199.02	0.484128	0.428947	0.359949	0.254796	0.1582	0.0860729
199.22	0.484757	0.430052	0.36077	0.253678	0.161527	0.0861575
199.42	0.482439	0.429445	0.360748	0.254963	0.158825	0.0858893
199.62	0.484168	0.430751	0.364725	0.258547	0.158832	0.0864124
199.82	0.482086	0.434124	0.365621	0.254792	0.161317	0.0842672
200.02	0.483213	0.429037	0.364208	0.256455	0.159275	0.0835474
200.22	0.480084	0.42713	0.363872	0.252704	0.161362	0.0824991
200.42	0.483828	0.434811	0.362445	0.255369	0.161835	0.0844258
200.62	0.482004	0.430553	0.363953	0.25497	0.158693	0.0826599
200.82	0.482113	0.428213	0.358317	0.258673	0.160231	0.0853296
201.02	0.483726	0.433726	0.361171	0.258111	0.160733	0.0846867
201.22	0.482545	0.434398	0.363014	0.256746	0.16424	0.0845403
201.42	0.478225	0.431625	0.360897	0.259489	0.157533	0.0866346
201.62	0.486337	0.433415	0.36157	0.257061	0.163726	0.0881184
201.82	0.485515	0.431291	0.361273	0.256053	0.161519	0.0846884
202.02	0.483445	0.433247	0.360068	0.25532	0.16179	0.088883
202.22	0.482606	0.432965	0.363199	0.259464	0.162862	0.0868907
202.42	0.484956	0.430384	0.36228	0.257524	0.16558	0.0866973
202.62	0.487154	0.4348	0.359244	0.253255	0.164548	0.0867915
202.82	0.482978	0.431167	0.363711	0.257304	0.16507	0.0871699
203.02	0.485113	0.432952	0.361872	0.257417	0.165269	0.0878083
203.22	0.486439	0.432588	0.361967	0.259169	0.171365	0.086029
203.42	0.482478	0.431156	0.365779	0.263889	0.170197	0.0858491
203.62	0.482382	0.430695	0.363809	0.258281	0.171074	0.0875188
203.82	0.481788	0.433324	0.365684	0.256223	0.164592	0.0869679
204.02	0.484388	0.432289	0.363811	0.25912	0.164598	0.0875427
204.22	0.482924	0.435428	0.363333	0.258826	0.169611	0.0904003
204.42	0.484935	0.435345	0.362315	0.259722	0.174685	0.088476
204.62	0.484805	0.433584	0.366377	0.260547	0.170376	0.0898155
204.82	0.485192	0.43424	0.362837	0.255003	0.167661	0.0904279
205.02	0.483704	0.434532	0.364618	0.258467	0.170278	0.0914242
205.22	0.48399	0.43056	0.363506	0.260119	0.168732	0.089986
205.42	0.484161	0.43383	0.363113	0.259433	0.166857	0.0902671
205.62	0.485213	0.431585	0.365274	0.258961	0.169911	0.0935057
205.82	0.482992	0.437549	0.363621	0.25824	0.167337	0.0918718
206.02	0.486942	0.434653	0.361884	0.259452	0.170253	0.0887802
206.22	0.482989	0.431615	0.364049	0.259189	0.166226	0.089996
206.42	0.481886	0.435401	0.363519	0.260566	0.172668	0.0894824
206.62	0.488264	0.435549	0.364386	0.259814	0.170407	0.092897
206.82	0.488264	0.435549	0.364386	0.259814	0.170407	0.092897
207.01	0.473647	0.428833	0.368068	0.264003	0.179528	0.0943381
207.21	0.463735	0.420018	0.362322	0.256858	0.183335	0.0954249
207.41	0.449442	0.415824	0.357329	0.259262	0.178182	0.0950015
207.61	0.440152	0.408281	0.350814	0.25631	0.177649	0.0987614
207.81	0.434027	0.400976	0.349298	0.25719	0.177901	0.0978721
208.01	0.424114	0.396961	0.345194	0.256644	0.175616	0.0982219
208.21	0.42346	0.389481	0.341787	0.254781	0.176238	0.0985672
208.41	0.412409	0.38408	0.340771	0.254293	0.175081	0.0970902
208.61	0.408805	0.3779	0.336769	0.252503	0.17765	0.0966332
208.81	0.403661	0.374318	0.33122	0.248283	0.174342	0.0988089
209.01	0.396382	0.369925	0.330817	0.248098	0.172735	0.0957973
209.21	0.392067	0.36327	0.32708	0.247095	0.170398	0.0978444
209.41	0.385612	0.360823	0.326727	0.24304	0.170209	0.0953258
209.61	0.378808	0.357159	0.319982	0.243658	0.1702	0.0933786
209.81	0.375709	0.35658	0.313329	0.240425	0.166145	0.0932087
210.01	0.372683	0.352741	0.31609	0.237003	0.169778	0.0951386
210.21	0.366545	0.349084	0.313035	0.236026	0.16848	0.0909325
210.41	0.365701	0.342961	0.30342	0.235777	0.165462	0.0924831
210.61	0.361129	0.337958	0.302872	0.232021	0.166649	0.0939549
210.81	0.359533	0.334664	0.30259	0.227649	0.162123	0.0913884
211.01	0.354205	0.334105	0.298107	0.228451	0.165805	0.0915208
211.21	0.352908	0.330304	0.298936	0.227225	0.16185	0.0951461
211.41	0.344909	0.327139	0.292103	0.226869	0.159196	0.0915146
211.61	0.343543	0.325427	0.297073	0.221245	0.163518	0.0925384
211.81	0.339356	0.320435	0.287228	0.224029	0.160808	0.0895766
212.01	0.336477	0.317016	0.286881	0.222168	0.15826	0.0857345
212.21	0.335567	0.314552	0.285721	0.21746	0.158957	0.0893751
212.41	0.3323	0.310008	0.284707	0.21596	0.159713	0.0928704
212.61	0.329487	0.31114	0.279692	0.216443	0.157876	0.0894737
212.81	0.322975	0.309763	0.27775	0.214371	0.159033	0.0848799
213.01	0.320778	0.30772	0.277232	0.214342	0.151084	0.0867017
213.21	0.324183	0.298438	0.274544	0.211469	0.155067	0.0884497
213.41	0.31601	0.301942	0.273374	0.219439	0.151138	0.0893704
213.61	0.313868	0.299623	0.27206	0.209972	0.149643	0.0830417
213.81	0.314808	0.295543	0.267375	0.206836	0.151119	0.0869831
214.01	0.311084	0.290569	0.266217	0.20703	0.14647	0.0871141
214.21	0.30745	0.290429	0.266043	0.20927	0.146629	0.0810309
214.41	0.304036	0.288172	0.266317	0.205852	0.148575	0.0849614
214.61	0.302208	0.287952	0.26005	0.204681	0.146699	0.0816725
214.81	0.295599	0.282586	0.262715	0.201103	0.148286	0.0861686
215.01	0.296696	0.285963	0.258458	0.200637	0.152012	0.0880942
215.21	0.296225	0.279925	0.260295	0.196228	0.149616	0.0819061
215.41	0.292915	0.278969	0.253471	0.198259	0.14352	0.0808011
215.61	0.289384	0.276377	0.25671	0.199393	0.141768	0.0814157
215.81	0.285898	0.277383	0.248645	0.192891	0.14238	0.0827315
216.01	0.286632	0.268448	0.249105	0.193299	0.142171	0.0829728
216.21	0.283723	0.270393	0.243696	0.196118	0.142253	0.0818908
216.41	0.284411	0.267584	0.246092	0.194389	0.143694	0.0821894
216.61	0.27946	0.26804	0.245641	0.1915	0.141388	0.0776024
216.81	0.278844	0.263311	0.243846	0.18984	0.142655	0.0820632

## Sheet: LPP Diss curve rep 1
	Concentration (uM)
Times (s)	80	53.33	35.56	23.7	15.8	10.53	7.022	4.68	3.12	2.08	1.39	0
0	0.390743	0.353141	0.321063	0.289264	0.256816	0.226819	0.195342	0.165475	0.138204	0.0982829	0.0789853	-0.0020469
0.2	0.275332	0.246966	0.220188	0.200796	0.148467	0.113857	0.119029	0.108972	0.0734046	0.0500428	0.0380272	-0.00535769
0.4	0.200819	0.174922	0.163109	0.139507	0.10039	0.0755805	0.0823115	0.0727794	0.052814	0.039326	0.0297079	-0.00262748
0.6	0.131639	0.112776	0.107003	0.0908367	0.0646792	0.0522457	0.05253	0.0474661	0.0429892	0.0294373	0.0182145	-0.00203288
0.8	0.08904	0.0758053	0.0700279	0.0598553	0.043081	0.0394406	0.0377236	0.0353168	0.0324733	0.0240829	0.0173402	-0.0039008
1	0.0572413	0.049251	0.0442219	0.0414346	0.0283883	0.0283669	0.0290142	0.0218238	0.020698	0.0147228	0.0118833	-0.00725534
1.2	0.0356431	0.0315999	0.0311248	0.0312251	0.0227435	0.0153111	0.0187001	0.0175253	0.0166289	0.0137381	0.00939796	-0.00151771
1.4	0.0273881	0.0237129	0.0206811	0.0212821	0.0160477	0.0154079	0.0139473	0.014022	0.0151639	0.0108161	0.00651049	0.0008801
1.6	0.022235	0.0204228	0.0152486	0.0198088	0.0136326	0.0144458	0.0114567	0.010784	0.0150747	0.00903635	0.00467944	-0.00096684
1.8	0.0178943	0.0185935	0.0142208	0.0163546	0.0103713	0.0126346	0.00958675	0.00929482	0.0117036	0.00874758	0.00152052	-0.00053949
2	0.0126497	0.0129648	0.0157151	0.0162435	0.0110589	0.0108504	0.00788303	0.00450496	0.0117571	0.011833	0.0021753	-0.00317734
2.2	0.0135167	0.0132298	0.0140851	0.0137948	0.00989146	0.0139167	0.0111728	0.00719744	0.00995952	0.00741107	0.00084481	-0.0052588
2.4	0.0139049	0.0126774	0.00782316	0.0123288	0.012228	0.0116376	0.00296129	0.00793409	0.00667683	0.00483496	0.00143305	-0.00245602
2.6	0.0133386	0.0101068	0.0100053	0.0130972	0.00810632	0.0135613	0.00779597	0.00862137	0.00593223	0.005571	0.00134383	-0.00496651
2.8	0.011422	0.0113041	0.00886726	0.0148074	0.00857125	0.0120877	0.00517629	0.00995462	0.00810862	0.00847626	0.00037505	0.0019334
3	0.0118385	0.011415	0.00956361	0.00933302	0.0130081	0.00932334	0.0120138	0.00778953	0.00861803	0.00667487	0.00533829	-0.00266725
3.2	0.0128416	0.0117403	0.00922819	0.00965779	0.0108645	0.00775519	0.00946987	0.00583106	0.010916	0.00389708	0.00145785	-0.00231802
3.4	0.0103366	0.0102249	0.00638759	0.0118326	0.00950477	0.00835115	0.0088808	0.0077055	0.00811122	0.00510154	-0.00139165	-0.0007646
3.6	0.0126399	0.012251	0.00932982	0.014991	0.0101457	0.0090852	0.00586082	0.0107569	0.00488082	0.00358756	0.00109076	-0.00208924
3.8	0.0130879	0.0119168	0.00772683	0.0115606	0.00901875	0.0122808	0.00648667	0.00520601	0.0048469	0.0063077	0.00203607	-0.00028196
4	0.00748877	0.0128868	0.00533446	0.00866638	0.00779295	0.00830458	0.00769507	0.00632965	0.00370272	0.00523884	0.00052204	-0.00101126
4.2	0.00688782	0.0103486	0.0123826	0.0107467	0.0123467	0.00987605	0.00803768	0.00873055	0.00530307	0.00578011	-0.0014708	2.55e-06
4.4	0.00790789	0.0089167	0.00830593	0.00946387	0.00763211	0.00470527	0.00596242	0.0030854	0.00511198	0.00862958	0.00135842	0.00330445
4.6	0.00969467	0.00997403	0.00822231	0.0106387	0.00889483	0.0116202	0.00718347	0.00468218	0.00420298	0.00331611	0.00217783	0.00186225
4.8	0.0123203	0.0128428	0.010475	0.0135813	0.00575059	0.0101261	0.00894908	0.00456496	0.00580441	0.00568566	-0.00104159	-0.00078388
5	0.0104663	0.0116439	0.00685512	0.00977062	0.00890263	0.0113715	0.00674856	0.00526144	0.00673563	0.00431675	0.00191111	-0.0035695
5.2	0.0128669	0.00579591	0.00748849	0.0111145	0.00825007	0.00851516	0.00697599	0.00334245	0.00702453	0.00660002	0.00074656	-0.00107505
5.4	0.00860211	0.00955313	0.00843837	0.0101284	0.00574025	0.00559514	0.00677218	0.00474956	0.00553402	0.00372746	0.00237903	-0.00492081
5.6	0.0127514	0.00916502	0.00707442	0.008995	0.00745803	0.010651	0.00576338	0.00723926	0.00690878	0.00671543	0.00091637	-0.00119585
5.8	0.0102659	0.0111297	0.00908389	0.00627946	0.00933528	0.0098409	0.00528203	0.00493737	0.00336331	0.00364482	-0.0021501	-0.00041659
6	0.0121499	0.00863612	0.0107788	0.00621795	0.00837529	0.0111947	0.00802704	0.0086952	0.00329121	0.00762507	7.267e-05	-0.003461
6.2	0.0100907	0.00817341	0.00385429	0.00669983	0.00672578	0.01012	0.00497225	0.00481856	0.00484462	0.00235288	-0.00060961	0.00212925
6.4	0.0127121	0.00825324	0.00629199	0.00990944	0.00742083	0.00428374	0.00576917	0.00571294	0.00966733	-2.386e-05	0.00341766	-0.0001074
6.6	0.00873174	0.00758075	0.00605099	0.00970481	0.00749037	0.00527452	0.00379851	0.00478766	0.00763122	0.00616163	0.00378245	-0.00239683
6.8	0.00860525	0.00674416	0.00610225	0.00860307	0.00764703	0.0116626	0.00479299	0.00875176	0.00280503	0.00400622	0.00244411	0.00252013
7	0.00925564	0.00889748	0.00585272	0.00874242	0.00563213	0.00729636	0.00598625	0.00769212	0.00421558	0.00372154	0.00087182	-0.00501564
7.2	0.0133338	0.00831508	0.00713224	0.010419	0.00670327	0.00518587	0.00904498	0.00457659	0.00552633	0.00368782	0.00363788	-0.00249792
7.4	0.0125137	0.0132756	0.0053243	0.00924041	0.00290466	0.00605505	0.00722196	0.0059599	0.00592103	0.00506621	-0.00222809	-0.00018565
7.6	0.0102972	0.00747721	0.00345428	0.00910634	0.00878058	0.00471211	0.0091351	0.00121731	0.00124024	0.00840996	-0.00279463	-0.00216242
7.8	0.00900012	0.00917158	0.00437407	0.00619576	0.00887816	0.0108551	0.00571076	0.00658691	0.00496154	0.00446984	0.00142631	-0.00052664
8	0.00887254	0.00843033	0.00838965	0.00891086	0.0081478	0.00704466	0.00519509	0.00349256	0.00855244	0.00370672	0.0053775	-0.00146735
8.2	0.0138958	0.00927393	0.00470606	0.00733689	0.00799748	0.00964191	0.00468455	0.00576695	0.00423815	0.0006778	-5.905e-05	0.00084416
8.4	0.00705525	0.00652191	0.0117956	0.00739574	0.00831834	0.00773838	0.00200608	0.00345532	0.00558581	0.00293789	0.0012632	0.00024897
8.6	0.00976002	0.013583	0.00974718	0.0100691	0.00360996	0.00141741	0.00613936	0.00485344	0.00270522	0.00533894	-0.0042844	0.00177191
8.8	0.0123606	0.0090978	0.00803875	0.00504857	0.00559389	0.009703	0.0112158	0.00354295	0.00759098	0.00161172	0.00267329	-0.00145276
9	0.00595287	0.00838252	0.00419935	0.00781655	0.00648391	0.0075601	0.00523181	0.00436156	0.00336161	0.00501393	0.00473361	0.0015102
9.2	0.00873426	0.00676426	0.00280135	0.00761428	0.00518706	0.00865152	0.00698559	0.00733846	0.00522853	0.00718525	0.00165227	0.00116184
9.4	0.00865889	0.00760058	0.00580372	0.00992277	0.00631611	0.00513784	0.00752662	0.00486474	0.00205172	0.00209068	-0.00213727	-0.00362399
9.6	0.0122235	0.0099048	0.00065826	0.00870286	0.00544107	0.00687161	0.00581092	0.00665923	0.00466386	0.00166038	-0.00384919	-0.00414531
9.8	0.00947155	0.00973744	0.00635928	0.00982283	0.00757362	0.00593887	0.00512985	0.0022852	0.00425702	0.00547345	0.00187428	-0.00233958
10	0.0116301	0.00742216	0.00685525	0.00841475	0.00018921	0.00837066	0.00806155	0.00342521	0.00291182	0.00400026	-0.00155759	0.00111185
10.2	0.00678808	0.00666913	0.00686761	0.00462597	0.00621527	0.00820573	0.00565035	0.00430905	0.00344412	0.00175269	0.00057972	-0.00287257
10.4	0.0064898	0.0037305	0.00547532	0.0075438	0.00675875	0.0022192	0.00543041	0.00011116	0.00279279	0.00360767	-0.00169883	-0.00248785
10.6	0.00378789	0.00748415	0.00163694	0.0101433	0.00848154	0.00305869	0.00719804	0.00351585	0.00279542	0.0023375	-0.00013405	-0.00392931
10.8	0.00851321	0.00709118	0.00604329	0.00778559	0.00639133	0.00165475	0.0045786	0.001935	0.00403822	0.00286766	-0.00256411	-0.00049221
11	0.00967519	0.00770092	0.00387168	0.00555689	0.00701984	0.00553365	0.00239545	0.00878262	0.00052765	0.00211232	-0.00050342	-0.00297882
11.2	0.00941574	0.00433745	0.00569253	0.00775019	0.00575367	0.00868953	0.00513723	0.00108163	0.00188344	0.00293112	-0.00181909	0.00153627
11.4	0.00999499	0.00762313	0.00579655	0.00697177	0.00241446	0.00490498	0.00603069	-0.00244073	0.00505752	0.00307929	-0.00541374	-0.00273991
11.6	0.00981968	0.00869437	0.00328748	0.00526372	0.00621978	0.00479551	0.0053124	0.00304797	0.0035688	0.00100602	0.00139529	-0.00634514
11.8	0.0099145	0.0040348	0.00513125	0.00478734	0.00448061	0.00654883	0.0020035	0.00565903	0.00426974	0.00042519	-0.00084959	0.00080523
12	0.00858955	0.00707888	0.00225014	0.00351761	0.00371688	0.00449206	0.0031602	0.00343413	0.00507034	-0.0009356	6.434e-05	-0.00035011
12.2	0.00918145	0.00497029	0.00487773	0.00398169	0.00345477	0.00702441	0.00465331	0.00509554	0.00274638	0.00229071	0.00052968	-0.00018606
12.4	0.00864787	0.00499149	0.0035049	0.00603009	0.00679496	0.00306023	0.0067797	0.00493039	0.00701933	0.00432329	0.0007653	-0.00016523
12.6	0.0107936	0.00725455	0.00463598	0.00807249	0.00358063	0.00829729	0.00386538	0.00450532	0.00489305	0.00621968	0.00122022	-0.00097567
12.8	0.00771704	0.00578582	0.00572924	0.00881072	0.00157407	0.00739255	0.00205835	-0.00115241	0.00604758	0.00329987	-8.863e-05	0.00042471
13	0.00787918	0.00569857	0.00570957	0.00963581	0.00962419	0.00233849	0.00082779	0.00389234	0.00536218	0.00683654	0.00199599	-0.001189
13.2	0.00618307	0.00665974	0.0051718	0.0111931	0.00354028	0.00252073	0.00268079	0.00412565	0.0056246	5.916e-05	-0.00102531	0.00150545
13.4	0.0063662	0.00560773	0.00686571	0.00864424	0.00743671	0.00637677	0.00134014	0.00436828	0.00068442	-0.00061135	-0.0009227	-0.00138163
13.6	0.0103945	0.00507214	0.00311389	0.00195372	0.00496948	0.00656097	0.00492267	0.0029216	0.00348646	0.00325418	0.00264766	-0.0014246
13.8	0.00645462	0.00770573	0.00021254	0.0082397	0.00582189	0.0054552	0.00210049	0.00518978	0.00319409	0.00117527	0.00186222	0.00032718
14	0.00931616	0.0105119	0.00566119	0.00431789	0.00287443	0.00260471	0.00326167	0.00251732	0.00191532	0.00122091	-0.00279681	-0.00103963
14.2	0.00405177	0.00735472	0.00324671	0.00257816	0.00559603	0.00839329	0.00133928	0.0056872	0.00478336	0.00215122	-0.00073859	0.00131924
14.4	0.0086338	0.00705659	0.00586333	0.00713691	0.00287877	0.0097551	-0.00098848	0.00114169	0.00140606	0.00177552	-0.00189473	-0.00125144
14.6	0.00567584	0.0081713	0.00752668	0.00420722	0.00213033	0.00780832	0.00487516	0.00680387	0.00068531	0.00074786	0.00159094	-0.00251962
14.8	0.00597549	0.0036391	0.00083458	0.00772413	0.00592065	0.00627007	0.00355775	0.00096505	0.00147311	0.00622362	-0.00541747	-0.00078476
15	0.00317522	0.00635686	0.00592224	0.00518292	0.00526152	0.00384854	-4.41e-05	0.00599027	0.00339998	0.00107807	-0.00184173	-0.00135102
15.2	0.00900564	0.00300445	0.004344	0.00721024	0.00498542	0.00722692	0.00365232	0.00234872	0.00243924	0.00502214	-0.0004349	0.00081
15.4	0.00600367	0.00536854	0.00557169	0.00527618	0.0056705	0.00254097	0.00101419	0.00179729	0.00089266	0.00258351	-0.00180669	0.00056708
15.6	0.00401766	0.00708047	0.00697775	0.00694533	0.00532783	0.00471287	0.00318088	-0.0006031	0.00411898	0.00397832	0.00018587	-0.00499047
15.8	0.00501815	0.00520893	0.00623309	0.00645086	0.00363543	0.00672644	0.00633339	-0.00269482	0.00228376	0.00106138	-0.00061801	-0.00054137
16	0.00746476	0.00470192	0.00477074	0.00315495	0.00197091	0.00454476	0.00586285	0.00566171	-0.00087573	0.00468209	0.00030051	-0.00033051
16.2	0.00617138	0.00783192	0.00593174	0.0092702	0.00315267	0.00839492	0.00565466	0.00142955	0.00806593	0.00138386	-0.00555555	-0.00411766
16.4	0.00362498	0.0061062	0.0070849	0.00406383	0.00650917	0.00471368	0.00092661	-7.92e-06	0.00311376	0.00113362	-0.00189546	-0.0031628
16.6	0.00784763	0.00554766	0.00194608	0.00514291	0.00356382	0.00285182	0.0029924	0.00375169	0.0008832	0.00250155	-0.00180036	0.00413084
16.8	0.00744939	0.00401884	0.00569912	0.00731909	0.00497007	0.00367387	0.00527273	0.00105339	0.00493691	0.00121727	0.00048182	-0.00490404
17	0.00670183	0.00499272	0.00465035	0.0058082	0.00174817	0.00442146	0.00199397	0.00087034	-0.00048139	0.00157213	-0.00270849	-0.00157411
17.2	0.00496933	0.00560089	0.00658619	0.00270664	0.00400361	0.00384066	0.00555682	0.00501812	0.00068803	0.0001864	0.00161195	0.00034371
17.4	0.00291134	0.00790617	0.00371078	0.00626681	0.00457287	0.00319523	0.00595323	0.00130186	-0.00142581	0.00260926	0.00212628	-0.0031068
17.6	0.00388003	0.00737851	0.00395683	0.00540075	0.00341014	0.00165802	0.00403426	0.00283167	0.00202679	0.00428645	0.0011664	-0.0008165
17.8	0.00294419	0.00529709	0.00585879	0.00265723	-0.00077382	0.00114274	0.00073128	0.00649677	0.00501277	4.917e-05	-0.00133606	-0.00047127
18	-0.00030842	0.00128811	0.00195422	0.00540655	-0.00039059	0.00490507	0.00430207	0.00413963	0.00118733	0.00704601	0.00166988	-0.00290818
18.2	0.00114666	0.00291798	0.0033731	0.00583143	0.0049266	0.00639414	0.00394387	-0.00010352	0.00268155	0.00344467	0.00275234	-0.0004072
18.4	0.00690338	0.004978	0.00370375	0.00844583	0.00224187	0.00209149	0.00386338	0.00245939	0.00348886	0.00133169	-0.00384556	-0.00358206
18.6	0.00617286	0.00630188	0.00040068	0.00338947	0.00216121	0.00108914	0.00487333	0.00403274	0.00135076	-8.949e-05	-0.00181345	-0.00196227
18.8	0.00417461	0.00570595	0.0029884	0.0007275	0.00360455	0.0034555	0.00237616	0.00118636	0.00440645	0.00342197	0.00129525	0.00031115
19	0.00506709	0.00631733	0.00373372	0.00716003	0.00349462	0.00932378	0.00248677	0.00224719	-0.00015422	0.00102075	-0.00183504	0.00200609
19.2	0.00600344	0.00235786	0.00378075	0.00625801	0.00393253	0.00655054	0.00284324	0.00113177	0.00086404	0.00122875	-0.00237822	-0.00098432
19.4	0.0069656	0.00103849	0.00629093	0.00763184	0.00370428	0.00366093	-0.00467782	-0.00236196	0.00515482	-0.00190975	-0.00510168	-0.00312977
19.6	0.00564638	0.00464531	0.00534565	0.00616208	0.00477604	0.00601024	-0.00392	-0.00209205	0.00189426	0.00264504	-0.00248034	-0.0018593
19.8	0.00744018	0.0107752	0.00866044	0.00132044	0.00369916	0.00440166	0.00265274	-0.00236544	0.00099918	0.00311547	0.00227917	0.00109932
20	0.00730857	0.00596746	0.00274437	0.00286778	0.00304019	0.00563466	-0.00317281	0.00310987	0.00123748	0.00175762	-0.00151661	-0.00243939
20.2	0.00536718	0.00337936	0.00267415	0.00267884	0.00350156	0.00278162	0.00257987	-0.00036776	0.00150088	0.00181561	-0.00414431	0.00015833
20.4	0.00708108	0.0061906	0.00064465	0.0018667	0.00629399	0.00477842	0.00359886	-0.00173605	0.00296934	0.00053888	-0.00242028	-0.00502319
20.6	0.00388348	0.00225984	0.00145737	0.00363626	0.00457378	0.00667818	0.00250253	0.00338344	4.854e-05	0.00231964	-0.0044192	-0.00093345
20.8	0.0027521	0.00534355	0.0027094	0.00221026	0.00324451	0.00381814	0.00425155	0.00039945	0.00432255	-0.00084981	-0.00070619	0.00253644
21	0.00662388	0.00399903	0.00130109	0.00528667	0.00434194	0.00427657	0.00194002	0.00434991	0.00223687	0.00137229	-0.00366613	-0.00079835
21.2	0.0061348	0.00208268	0.00035713	0.00289276	0.00149792	0.00314306	0.00400033	0.00177072	0.00140256	-0.00156872	0.0008279	-0.00074738
21.4	0.00208232	0.00249251	0.00028163	0.00707194	0.00061256	0.00440007	0.00398116	-0.00481162	6.715e-05	0.00275746	-0.00142315	-0.00560404
21.6	0.00521861	0.0103175	0.00515818	0.00443617	0.0028256	0.0049724	0.00275982	0.00271579	0.00227567	0.00533547	-0.00121825	-0.00100067
21.8	0.00537396	0.00513612	0.00320527	0.00323185	0.00239639	0.00453687	0.00348942	0.00132631	0.00196629	0.00298744	-0.00247323	0.00277451
22	0.00620512	0.00172236	0.00491335	0.00366564	0.00603313	0.00056245	0.00441	0.00309328	0.00149035	0.00294434	-0.00285256	-0.00037617
22.2	0.00242799	0.00117861	0.00180406	0.00475815	0.00535961	0.00076849	0.00042049	0.00146205	0.00183183	-0.00073768	-0.00401822	-0.00062983
22.4	0.00465394	0.00344842	0.00282505	0.00382238	0.00078407	0.00240268	0.00333674	0.00280374	-0.00476932	-0.000911	-0.00164788	-0.00140266
22.6	0.00633502	0.00266465	0.00167808	0.00552252	0.00340165	0.00201621	0.00276133	0.00229131	0.00026942	0.00318816	-0.00332901	-0.00222314
22.8	0.00243085	0.00200919	0.00215329	0.00177886	0.00704055	0.00433639	-0.00056538	0.00186512	-0.00122436	0.00075697	-0.00280086	-0.00474837
23	0.00286742	0.00326864	0.00260055	0.0028603	0.00155692	0.00405136	0.00088309	0.00201067	0.00222123	6.184e-05	-0.0037294	-0.00489231
23.2	0.00064511	0.00207139	-0.00190692	0.00663018	0.00344728	0.00494035	0.00136921	-0.00132244	0.00346166	-0.00140301	-0.00187834	-0.00439891
23.4	0.00152023	0.00201125	-0.00242477	0.00219225	0.00225077	0.0044728	-0.00176	0.00174566	-0.00115292	0.00027053	0.00133919	-0.00213017
23.6	0.00757114	0.00434762	0.00146281	0.00641116	0.00268182	0.002034	0.00267054	0.00269433	-0.00048351	-0.00030598	-0.00283459	-0.00075305
23.8	0.0043046	0.00729133	0.00288508	0.00501064	8.215e-05	0.00491404	0.00229954	0.00275355	0.00230444	0.0029256	-0.00270089	0.0041252
24	0.00589746	0.00222089	-0.00246894	0.00716818	0.00178908	0.00184838	-0.002133	0.00155061	0.00016026	-0.00153209	-0.0033354	-0.00167627
24.2	0.00084778	0.00236852	0.00257235	0.00319948	0.00108087	0.00557731	0.00345749	0.00219732	0.00166437	-0.00131933	-0.00337813	-0.00121553
24.4	0.00194274	0.00060612	-0.00124556	0.0012717	0.00481571	0.0038812	0.00162033	0.00137966	-0.00080336	-0.00184941	-0.00362575	0.0038126
24.6	0.00744136	0.00094446	0.00439625	0.00241795	0.00452462	0.0028091	0.003258	0.00017421	-0.00015824	0.00076916	-0.00554857	-0.00274331
24.8	0.00626118	0.00460082	-0.00082493	0.00379863	0.00116363	0.00085666	0.00332947	0.00137266	0.00140683	-0.00366962	-0.00616038	-0.00074393
25	0.00770148	0.00461639	0.00268363	0.00631373	-0.00072144	0.00657978	-0.00065868	-0.00337567	-0.0004776	0.00171561	0.00120959	-0.00406239
25.2	0.00394083	0.00279843	-0.00165565	0.00190171	0.00314935	-0.00029573	-0.00160259	-0.00255983	-0.00196879	0.00066046	-0.00131013	-0.00187258
25.4	0.00210636	0.00160798	-0.00075817	0.00305884	0.0059402	0.00408085	-0.00209088	0.00110304	-0.00193348	0.00436043	-0.00331477	-0.00381986
25.6	0.00441573	0.00306405	0.00268773	0.00896308	0.00189876	0.00235051	0.00457626	0.00134967	-0.00069402	0.00105685	-0.00342415	-0.00253579
25.8	0.00195483	0.00631014	0.00203525	0.00258029	-0.00123176	0.00542826	0.00380718	-0.00101371	0.00266445	0.00043958	-0.00174975	-0.00213707
26	0.00189056	0.00210939	-0.00191724	0.00204187	0.00617343	0.00411272	0.00235426	-0.00095118	0.00091705	0.00228713	-0.00186737	-0.00575374
26.2	0.00429531	0.00050113	0.00109131	0.0019196	0.00041672	0.00218088	-0.00166919	0.00525906	0.00072646	-0.00064046	-0.00038188	-0.00333227
26.4	0.00491443	0.00115088	-0.00213476	0.0027522	-0.00104643	0.00245518	0.00057582	0.00721018	0.00247033	0.00062047	-0.00036123	0.00085415
26.6	0.0034667	0.00491542	0.00207862	0.00294512	0.00142323	0.00283411	-0.00116611	0.00021704	0.00278573	0.00151844	-0.00280866	0.00134005
26.8	0.00232566	0.00080791	-0.0007079	-0.00081069	0.00321239	-0.00012691	0.00111867	-0.00011174	0.00113308	0.00075205	-0.00283193	-0.00606752
27	0.00356031	0.00377482	-0.00041086	0.00499901	0.0039368	0.00208556	0.00060804	0.00085517	0.00162274	-0.00191936	-0.00530022	-0.0036673
27.2	0.00193847	0.00300201	0.00281136	0.00333195	-0.00132317	0.00419841	0.00047483	-0.00424809	-0.0012373	-0.0017803	-0.00333758	-0.00114735
27.4	0.00419589	0.00257936	-0.00392377	0.00552557	0.00199723	0.00179568	0.00294582	0.002547	-0.00071779	0.00019979	-0.0015231	-0.00162405
27.6	0.0051549	0.00441701	-0.00096007	0.00230945	0.00238897	0.00053383	0.00344323	0.00299127	-0.00402095	-0.00101992	-0.00199196	-0.00073432
27.8	0.00401503	0.00498623	0.00233596	0.00228246	-0.00169074	-0.00025342	0.00362821	-0.00294319	-0.00064883	-0.00187365	-0.00206206	-0.00436821
28	0.00702817	0.00285249	0.00146201	5.751e-05	0.00066477	0.00648	0.00332825	0.00211411	0.00111554	0.00145956	-0.00576988	-5.121e-05
28.2	0.00274898	0.00412703	0.00410997	0.00772831	0.0001253	0.00166136	0.00050791	0.00341602	-0.00161474	-0.00227872	-0.00078374	-0.00361929
28.4	0.00359692	0.00379416	0.00029071	0.00571168	0.00052897	0.00011348	0.00116859	-0.00115777	2.118e-05	0.00046495	0.00259603	-0.00117596
28.6	0.00148102	0.0027945	0.00059416	0.00191184	0.00071021	0.00073502	0.00337679	-0.00095707	-0.00367769	0.00318035	-0.00566842	-0.00124795
28.8	0.00399406	0.00496576	2.189e-05	9.676e-05	0.00170583	0.00184427	0.00107021	-0.00133275	-0.00480577	0.00171156	-0.00329889	-0.00442504
29	0.00112017	0.00451704	-0.00075955	0.00105891	0.00341372	-0.00127434	-0.00212628	0.00413037	0.00029083	-0.00250525	-0.00433845	-0.00132578
29.2	-0.00044858	0.00029551	-0.00195724	0.00285488	0.00093895	0.00060432	0.00028272	-0.00370062	-0.00068524	0.00077954	-0.00305301	0.00160273
29.4	0.00337725	0.00274899	0.00025253	0.00666823	0.000758	0.0006429	0.00304824	0.0002004	-0.00027973	0.0036032	0.00054603	-0.00191545
29.6	0.00513259	0.00145345	0.00351467	0.00282849	0.00020492	0.00039187	-0.00029527	-0.002673	-0.00061223	-0.00259501	-0.00151232	-0.00246677
29.8	0.00063648	-0.001518	5.145e-05	0.00233113	-0.00012132	0.0040053	0.00333604	0.00023158	-0.00178089	-0.00155778	-0.00346809	-0.00152083
30	0.00465403	0.00219335	-0.00212384	0.00268115	0.00142486	0.00417922	0.00330837	0.00056443	-0.00196611	-5.041e-05	0.00028048	-0.00218514

## Sheet: LPP Diss curve rep 2
	Concentration (uM)
Times (s)	80	53.33	35.56	23.7	15.8	10.53	7.022	4.68	3.12	2.08	1.39	0
0	0.505231	0.444092	0.400096	0.369039	0.329948	0.298011	0.256929	0.226032	0.28632	0.220342	0.17229	-0.00979139
0.2	0.350909	0.315804	0.266303	0.241847	0.217595	0.167397	0.141594	0.149251	0.19103	0.154898	0.117498	-0.0177395
0.4	0.255216	0.246735	0.189305	0.175765	0.1527	0.116144	0.100555	0.1092	0.154099	0.120361	0.0933965	-0.0135609
0.6	0.174802	0.190929	0.128827	0.121236	0.107584	0.0802547	0.0752014	0.0792442	0.123109	0.0969697	0.072003	-0.0132321
0.8	0.119363	0.143474	0.0876646	0.0869201	0.0779284	0.0597077	0.0480395	0.0558166	0.0997778	0.0787896	0.0563256	-0.0130742
1	0.0860099	0.106319	0.0644626	0.0631757	0.0556539	0.0457605	0.0436997	0.0431004	0.0792781	0.0603999	0.0490037	-0.0129314
1.2	0.0622967	0.0838027	0.0453365	0.0492895	0.0424282	0.030757	0.0327863	0.0326115	0.0651578	0.0520678	0.0358566	-0.0103392
1.4	0.0490493	0.0654954	0.0366833	0.0411659	0.036824	0.0309892	0.0243028	0.0289744	0.0566378	0.0387961	0.0289605	-0.0171351
1.6	0.0369744	0.055005	0.028855	0.0298008	0.0279023	0.0216049	0.0252357	0.0208808	0.0476415	0.0335762	0.0240827	-0.0128212
1.8	0.0342066	0.0424106	0.0257703	0.0240262	0.0226798	0.0205159	0.0200673	0.0200681	0.0458753	0.0296282	0.0192302	-0.0123499
2	0.0267701	0.0365797	0.0226458	0.0245772	0.0205016	0.0210205	0.0222664	0.0175061	0.0351739	0.0270473	0.0159052	-0.012542
2.2	0.0306609	0.0343291	0.018681	0.0213158	0.0202758	0.0123721	0.0224968	0.015066	0.0316715	0.0248837	0.0112655	-0.00895844
2.4	0.0277135	0.0264892	0.0129406	0.0227913	0.01942	0.0115052	0.0174046	0.019754	0.0281501	0.0202568	0.0133473	-0.00877473
2.6	0.0234051	0.0220053	0.0126042	0.0210646	0.0212834	0.014703	0.0185144	0.0157126	0.0220858	0.0162608	0.00829667	-0.0115515
2.8	0.0251839	0.0247243	0.0164094	0.0217344	0.0199855	0.0120269	0.0133405	0.0123636	0.0252726	0.0145501	0.00748469	-0.00932601
3	0.0206806	0.0232079	0.0164306	0.0169375	0.0182569	0.00907804	0.0158986	0.0104049	0.023191	0.015934	0.00680333	-0.00907741
3.2	0.0264791	0.022482	0.0183809	0.017575	0.0178083	0.0148901	0.0144554	0.0142404	0.0189517	0.0127729	0.00813412	-0.0142666
3.4	0.0194452	0.0217536	0.0101896	0.0165398	0.014401	0.0120624	0.0161734	0.0124157	0.0206647	0.0116921	0.00487461	-0.0132815
3.6	0.0182736	0.0170151	0.0161609	0.018539	0.0157082	0.0183099	0.018169	0.0124155	0.0168276	0.0120503	0.00545991	-0.010837
3.8	0.0174511	0.0194528	0.0155516	0.0158444	0.0175421	0.010378	0.0118762	0.0125662	0.0183502	0.0113639	0.00846454	-0.0112409
4	0.0203094	0.0175388	0.014344	0.0134916	0.0137036	0.0156636	0.0114228	0.0114119	0.0237133	0.0100354	0.00600094	-0.0121274
4.2	0.0189592	0.0145536	0.0107786	0.0137636	0.0122533	0.0139333	0.0132581	0.0110706	0.0174326	0.0144585	0.0067592	-0.00985533
4.4	0.0171515	0.0160263	0.0139655	0.0134439	0.0129543	0.0101966	0.0129696	0.00741949	0.0178873	0.00940686	0.00578421	-0.0105252
4.6	0.0174727	0.0182852	0.0134194	0.0168644	0.0121385	0.0140228	0.0140642	0.00881561	0.0137087	0.0126087	0.00571511	-0.0113056
4.8	0.0187131	0.0181206	0.0130649	0.0162268	0.0152494	0.00870093	0.0126261	0.0128943	0.0189232	0.00734651	0.00450332	-0.0122214
5	0.0207801	0.0145853	0.0107222	0.0139644	0.0169285	0.016181	0.011651	0.00810786	0.0183627	0.00759858	0.00011243	-0.0137581
5.2	0.0150331	0.0145319	0.0141529	0.0159157	0.0141514	0.0130998	0.017676	0.0100991	0.0164472	0.0113333	0.00541414	-0.0104141
5.4	0.0161505	0.0188938	0.01162	0.012566	0.0119751	0.011549	0.0166709	0.0143095	0.0195094	0.0127797	0.00201793	-0.00997741
5.6	0.0183104	0.0194685	0.0131901	0.0173905	0.0171272	0.0105179	0.0155434	0.00941591	0.0173804	0.00974423	0.00319733	-0.00923857
5.8	0.0184459	0.0157713	0.0127049	0.0135415	0.0161183	0.013502	0.0148834	0.01068	0.0160192	0.00795266	0.00291509	-0.0119394
6	0.0175505	0.0193547	0.0120123	0.0118574	0.0141501	0.00918254	0.0161119	0.00961647	0.0172167	0.00906299	0.0031476	-0.0107109
6.2	0.0161881	0.012557	0.0117383	0.0140541	0.0162765	0.00831576	0.0130992	0.00850196	0.0151489	0.00914482	0.00649404	-0.0113204
6.4	0.0147617	0.0134993	0.0124074	0.0142049	0.0122083	0.0103065	0.013234	0.00954526	0.0147508	0.00357116	0.00340201	-0.0108306
6.6	0.0167206	0.014569	0.00825008	0.0112859	0.0125869	0.00880506	0.0114261	0.0111045	0.0159911	0.0103457	0.00017992	-0.0151027
6.8	0.0198844	0.0132111	0.0118516	0.0144959	0.0119747	0.0107399	0.0151676	0.0101665	0.0148579	0.00928245	0.00350825	-0.0109335
7	0.0157638	0.014394	0.0123526	0.0121516	0.0146847	0.00992717	0.00888138	0.00630799	0.0157459	0.00566542	0.00403641	-0.00595591
7.2	0.0164459	0.0143854	0.0150881	0.0105819	0.0128461	0.00909908	0.00919235	0.00539498	0.0147235	0.00542261	0.0057517	-0.0122996
7.4	0.0119988	0.0105606	0.0122238	0.0104331	0.0133056	0.00835223	0.0150522	0.00665259	0.0122553	0.00574677	-0.00116291	-0.0125914
7.6	0.0135741	0.0137728	0.0078115	0.0133546	0.0103435	0.0120731	0.0149781	0.00776982	0.0147456	0.00392208	0.0039684	-0.00776101
7.8	0.0148489	0.0136871	0.00847289	0.0131663	0.0125759	0.00739866	0.00895898	0.00686359	0.0122498	0.0108442	0.00410706	-0.0131195
8	0.0126892	0.014584	0.00838009	0.0108749	0.0116589	0.0117078	0.0121727	0.00947097	0.0130537	0.00340628	0.003727	-0.00728813
8.2	0.0181695	0.0131607	0.00702441	0.0087364	0.0136677	0.0106736	0.0121412	0.00973332	0.0146807	0.00821654	0.00858701	-0.0100156
8.4	0.00892803	0.0131696	0.00967162	0.0120486	0.0111048	0.00801001	0.00886729	0.0068939	0.0132665	0.00515893	-0.00198552	-0.0118072
8.6	0.0177249	0.0158134	0.00997193	0.00955691	0.0118316	0.0117963	0.0151581	0.00854544	0.0188334	0.00752793	0.00146422	-0.0116735
8.8	0.0167257	0.0129874	0.00816913	0.0128629	0.0170115	0.0088357	0.00642194	0.00669665	0.0137234	0.00956104	0.00472153	-0.0105383
9	0.0120433	0.0113724	0.00970644	0.0161281	0.0117372	0.0112207	0.0142892	0.00790634	0.012494	0.00706791	0.00030042	-0.0144445
9.2	0.0114301	0.0149887	0.00983725	0.0124263	0.0146033	0.0131679	0.00719809	0.00676089	0.0110404	0.00738042	-0.00058328	-0.012651
9.4	0.0126508	0.0131356	0.0011413	0.0133934	0.0157823	0.00876175	0.0096556	0.00662481	0.016093	0.00641831	-0.0002934	-0.0106755
9.6	0.0149307	0.0109636	0.00880494	0.00974847	0.00946412	0.00916743	0.0109596	0.00931397	0.00860116	0.00992841	0.00148799	-0.0128038
9.8	0.012274	0.0115863	0.0100878	0.00853705	0.00970255	0.0101089	0.0100451	0.00744774	0.00942946	0.00549685	0.00053419	-0.013997
10	0.014652	0.014308	0.00729852	0.011486	0.00868665	0.0113752	0.00902378	0.00675228	0.0139695	0.00728279	0.00294688	-0.015119
10.2	0.0138901	0.0113936	0.00600341	0.00893227	0.0114644	0.00482963	0.0115119	0.0051029	0.0159595	0.00818324	0.00389863	-0.0128581
10.4	0.0147931	0.0108399	0.0138309	0.00692806	0.0116086	0.0104809	0.00577017	0.00538462	0.011592	0.00827914	0.00045199	-0.0125572
10.6	0.017511	0.0122384	0.00612174	0.00671548	0.0115411	0.0105643	0.0100363	0.00161315	0.0121475	0.00544671	0.00326333	-0.010522
10.8	0.0131117	0.0124783	0.00673393	0.00741718	0.00981404	0.00635366	0.00599832	0.00687293	0.0154268	0.00719536	0.00346744	-0.00957088
11	0.0134869	0.0132895	0.0100357	0.00893422	0.00948575	0.00783465	0.0077276	0.00515972	0.0134983	0.00498964	0.00084995	-0.0110497
11.2	0.0114223	0.00867825	0.00986556	0.009969	0.00911476	0.00521062	0.00958695	0.00597682	0.0124411	0.00621157	0.00040271	-0.0101402
11.4	0.0145628	0.00940703	0.00404469	0.00744397	0.0106709	0.00683547	0.00539639	0.00315547	0.0122692	0.0073944	0.00427816	-0.00964589
11.6	0.0105341	0.0137086	0.00650883	0.0130974	0.0145656	0.00710308	0.00696613	0.00419459	0.0142715	0.0114176	-0.00035846	-0.0157469
11.8	0.0094784	0.0101117	0.00554164	0.00918176	0.00839265	0.00682052	0.00219006	0.00716673	0.0136293	0.00671569	-0.0003804	-0.00998
12	0.0118635	0.0100215	0.00973334	0.00529191	0.00936093	0.010104	0.00688676	0.0065815	0.0119633	0.00132543	0.00382016	-0.0105764
12.2	0.014362	0.00892162	0.00243887	0.00639601	0.0127788	0.01131	0.00519808	0.00435377	0.0120815	0.00406721	-0.00120306	-0.0140809
12.4	0.013476	0.0127038	0.00814963	0.00918877	0.0122529	0.00655128	0.00107305	0.00520739	0.00944281	0.00457412	0.00272412	-0.0146362
12.6	0.0121437	0.010517	0.00650248	0.0061349	0.00508277	0.0060731	0.00414377	0.00464195	0.00911971	0.00557463	0.00455312	-0.0107664
12.8	0.0122735	0.0123229	0.00571184	0.012002	0.00513699	0.00666256	0.00682352	0.00141958	0.0113655	0.00476752	0.00081343	-0.0148944
13	0.0144547	0.0109025	0.00714798	0.00844202	0.00857903	0.00750932	0.00287643	0.00441135	0.0139188	0.00310475	0.00213032	-0.0144908
13.2	0.0114649	0.0128711	0.00865522	0.00569613	0.00823084	0.00803483	0.00223444	0.00649015	0.013824	0.00189952	-0.00043501	-0.0138066
13.4	0.0101438	0.0131859	0.00813667	0.00444607	0.00854271	0.00423987	0.00392496	0.00360874	0.0111719	0.00296003	0.0010628	-0.0127678
13.6	0.0134366	0.0131191	0.00551576	0.00944335	0.0120143	0.00978018	0.00386413	0.00323027	0.0105009	0.00207913	-0.00194945	-0.0116731
13.8	0.00925668	0.00956886	0.00815177	0.0106443	0.00887973	0.00768148	0.00375851	0.00159373	0.0129806	0.00348817	0.00045753	-0.0147127
14	0.00793643	0.00840091	0.00236855	0.00619909	0.0108668	0.00624011	0.00681188	0.00771581	0.0106797	0.00722794	-0.00082067	-0.012446
14.2	0.0128148	0.00797177	0.00533699	0.00516879	0.00951412	0.00738887	0.00104128	0.00643415	0.00949155	0.00392449	-0.00103826	-0.0135519
14.4	0.0082947	0.0125784	0.005573	0.0100787	0.00715311	0.0036998	0.0008264	0.00555803	0.011897	0.00529961	0.00124178	-0.0115002
14.6	0.0114399	0.00999405	0.0052892	0.0052126	0.00475636	0.0021409	0.00211769	0.00272589	0.0113624	0.00294962	0.00244499	-0.0154742
14.8	0.0104912	0.00795644	0.00542	0.00638607	0.0089945	0.00436412	0.00514134	0.00822249	0.0168572	0.00065431	-0.00028869	-0.015715
15	0.006299	0.00767746	0.00830811	0.00470995	0.00758751	0.0110297	0.0034663	0.00191097	0.0124905	0.00381215	-0.00168728	-0.00992362
15.2	0.0119534	0.00514935	0.00415117	0.010136	0.00712574	0.00111494	0.00236051	0.00340971	0.0109252	0.00125891	-0.00260402	-0.0121405
15.4	0.0112555	0.00581055	0.00287536	0.00646383	0.00619475	0.00107382	0.00266892	0.0057131	0.0110886	0.00654971	0.00028887	-0.0118347
15.6	0.0144777	0.00839745	0.00512741	0.00478954	0.00550744	0.00529025	0.00485906	0.00217712	0.0103168	0.00156801	-0.00038068	-0.0131666
15.8	0.0120058	0.0102968	0.0052189	0.00290847	0.0100252	0.00600831	0.00473633	0.0025073	0.0116051	0.00113606	-0.00485974	-0.0123106
16	0.00473064	0.00792962	0.00447403	0.00652113	0.00845406	0.00567653	0.00347809	0.00358589	0.0100474	0.00330326	0.00032676	-0.0136989
16.2	0.00573238	0.00860844	0.00438511	0.00819848	0.00645119	0.00409837	0.00200382	4.905e-05	0.00901869	0.00272143	-0.00177554	-0.0144276
16.4	0.0114345	0.00727919	0.00214038	0.00753792	0.00485705	0.0061333	-0.00033196	0.00357177	0.01225	0.00143427	6.605e-05	-0.0107475
16.6	0.00619969	0.00675722	0.00123123	0.00411709	0.00673418	0.0041169	0.00461794	0.00235545	0.0125697	0.00535924	-0.00068369	-0.0129691
16.8	0.010997	0.00824275	0.00312892	0.00543949	0.00878639	0.00304092	0.00403016	0.0014461	0.0109561	0.0015477	-0.00337219	-0.0127003
17	0.0121402	0.00984063	0.00074763	0.00483477	0.00698595	0.00234718	0.00090992	0.00111311	0.0105638	0.00038188	0.00035615	-0.0145349
17.2	0.00806885	0.00778524	0.00404876	0.00959954	0.00468368	0.00185885	0.00143702	0.00223025	0.013034	0.00152849	0.0013711	-0.0138324
17.4	0.00754071	0.0063075	0.00175611	0.00443467	0.00395796	0.00534456	0.00112329	0.00326442	0.0111074	0.00395689	-0.00228675	-0.0144369
17.6	0.0084252	0.00689861	0.00386296	0.00384922	0.00733513	0.00448044	0.00151509	0.00616465	0.0028783	0.00214494	-0.00155407	-0.0122351
17.8	0.0117989	0.00796432	0.00227044	0.00345138	0.00666866	0.00505157	0.00047984	0.00376616	0.00898685	0.00032412	-0.00352872	-0.0142194
18	0.00875331	0.00892564	0.00683666	0.00444371	0.00561123	0.00305445	0.0009238	-0.00071365	0.00644303	0.00445771	5.774e-05	-0.0173764
18.2	0.00546575	0.00817891	0.00261868	0.00562164	0.00736643	-0.00117921	0.00103157	0.00330728	0.0112957	0.00283104	0.00212825	-0.014125
18.4	0.00466987	0.00913792	0.00499885	0.00472469	0.00936253	0.00577197	-0.00193988	0.00097573	0.00853176	0.00166004	-0.00289412	-0.0169119
18.6	0.00673503	0.0100816	-0.0019998	0.00848682	0.00567003	0.00275286	0.0017513	0.00255292	0.00912258	-0.00070132	-0.00167326	-0.0131845
18.8	0.00784325	0.00661992	0.00217002	0.00358633	0.00476654	-3.138e-05	-0.00288261	0.00143313	0.00991564	-0.00114167	0.0012749	-0.0124719
19	0.00783772	0.00727127	0.00283598	0.00399985	0.00491167	0.00326892	0.00161301	0.0001315	0.00646903	-0.00062291	-0.00108703	-0.00947028
19.2	0.0112928	0.00477262	0.00515685	0.00052616	0.00384898	0.00247372	0.00243171	0.00182393	0.0124442	0.00327554	-0.00480257	-0.0140403
19.4	0.0099394	0.00708546	0.00265246	0.0081563	0.00452468	0.00297134	0.00136539	-0.00351475	0.00623616	0.00158247	-0.00301703	-0.0147568
19.6	0.00634157	0.00644347	0.00567495	0.00447948	0.00673947	0.00172166	0.00044477	0.00123935	0.00629048	1.396e-05	-0.00014888	-0.0180978
19.8	0.0044089	0.00429514	0.00261142	0.00346126	0.00676511	0.00123015	4.336e-05	0.00211545	0.00665982	0.00099002	-0.0022025	-0.013924
20	0.00512518	0.00459102	0.00319607	0.00428864	0.00421905	0.00143923	0.00215072	0.00330279	0.00894124	0.00422626	-0.00523916	-0.00993748
20.2	0.00824927	0.00512808	0.00152462	0.00487724	0.00614521	0.00256503	-0.00081501	0.00043371	0.00474153	0.00066211	-0.00473099	-0.013022
20.4	0.00635583	0.00607069	0.00083224	0.00597269	0.00516443	0.00261639	-0.00083161	0.00286931	0.00825564	-0.00143952	-0.00389205	-0.0124334
20.6	0.00913115	0.00495234	0.00492662	0.00765364	0.00523865	0.00741447	-0.00666389	4.526e-05	0.00714583	-0.00023618	-0.00254691	-0.0159476
20.8	0.00373786	0.00484626	0.00084174	0.00497426	0.00461936	0.00103294	-0.00151677	0.00073097	0.00989354	-3.45e-06	-0.00271921	-0.0165957
21	0.00927522	0.00605711	0.00490468	0.00300977	0.00671714	0.004922	-8.968e-05	-0.00129406	0.00729838	0.00097571	-0.00464978	-0.01605
21.2	0.00789393	0.00686695	0.00170321	0.00525546	0.0048097	0.00237799	-0.00466244	-0.00040084	0.00665455	0.00413272	-0.00252766	-0.0168025
21.4	0.00824267	0.00547137	-0.00016695	0.00572279	0.00306241	0.00493569	-0.00203387	-0.00030524	0.00729317	-0.00286875	-0.00294044	-0.0137111
21.6	0.00678979	0.00715933	-0.00327359	0.00509909	0.00566567	0.0017536	-0.00268256	0.00228407	0.0125033	0.00397183	-0.0026835	-0.017179
21.8	0.00508713	0.00513906	0.00104091	0.00573404	0.00083218	0.00170847	-0.00170712	2.883e-05	0.00597102	0.00398924	-0.00341871	-0.0145028
22	0.00386896	0.00421385	0.00104555	1.675e-05	0.00441611	-0.00175245	-0.00106183	-0.00170269	0.00517968	0.00216339	-0.00492539	-0.0179164
22.2	0.00873522	0.00556207	-0.00091796	0.00398388	0.00151594	0.00193515	0.00077471	-0.00258605	0.0057914	0.00070433	-0.00286828	-0.015041
22.4	0.00917285	0.0066152	0.00071602	0.00372841	0.00422455	0.00488905	-0.00029228	-0.00038527	0.00862402	0.00026638	-0.00238101	-0.0160064
22.6	0.00815162	0.00739997	3.82e-06	0.00476003	0.00354832	-0.00056075	-0.00675665	0.00133347	0.00347982	0.00239461	-0.0029517	-0.0141077
22.8	0.00839977	0.00626946	-0.00293396	0.0033296	0.00499992	0.00062533	-0.00400921	0.00223755	0.00303459	-0.00152127	-0.00632481	-0.0158449
23	0.00682304	0.00269224	0.0014338	0.00185316	0.00261208	0.00317964	-0.00417147	-0.00166248	0.00590644	0.00012547	-0.00548046	-0.0134933
23.2	0.00425093	0.00603517	-0.0012974	0.0031753	0.00685915	0.00430879	-0.00038077	0.0015176	0.00764963	0.00072051	-0.0052931	-0.0115861
23.4	0.00492624	0.00651919	0.00372651	0.0030147	0.00209053	0.00034444	-0.00206677	-0.00183975	0.0103816	0.00048211	-0.00217734	-0.0134285
23.6	0.00619344	0.00528972	0.00687513	0.00228021	0.00650172	0.00259427	0.00078329	0.00159582	0.00658078	0.00458863	-0.00564637	-0.0181667
23.8	0.00785651	0.00379287	0.00047965	0.00103374	0.00590484	0.00030152	-0.00430018	-0.00333336	0.00243381	-0.00140775	-0.0035577	-0.0156011
24	0.00705591	0.00537667	-0.00259947	0.00230863	0.00492463	0.00064041	-0.00235058	-8.442e-05	0.00762668	-0.00152368	-0.00377101	-0.0175593
24.2	0.00341713	0.00279231	0.00252153	0.00323704	0.00187454	0.00234388	0.00228652	0.00146166	0.00528541	0.00379264	-0.00429258	-0.0136971
24.4	0.00510241	0.00567345	0.00402854	0.00423052	0.00488504	0.00106666	-0.0044692	-0.00316407	0.00667724	-0.00382116	-0.00662945	-0.016049
24.6	0.00562528	0.00446619	-0.00195072	0.00538694	0.00443664	0.00409774	-0.00543347	-0.00107245	0.00764849	0.00116214	-0.00952786	-0.0158585
24.8	0.00137863	0.00453355	1.917e-05	-0.00130576	0.00360592	-0.00018071	-0.0028388	-0.00072518	0.00309319	-0.00273952	-0.00662067	-0.0147078
25	3.18e-05	0.0027804	0.00061572	-0.00143879	-0.00089198	-0.00135164	-0.00125468	-0.00090798	0.0034808	-0.00126554	-0.00164724	-0.0186472
25.2	0.00336524	0.00259351	0.00031167	0.00284085	0.00432329	-0.00165006	-0.00460419	-0.00132356	0.00738508	0.00164561	-0.00493961	-0.0126698
25.4	0.0045992	0.00196974	0.00400578	0.00290427	0.00337891	-0.0047295	-0.0014064	-0.00390673	0.00626306	-0.00286625	-0.00736607	-0.0163819
25.6	0.00499747	0.0037291	-0.00050617	0.00393663	0.00180596	-0.00376616	-0.00252727	0.00139512	0.004125	-0.00155985	-0.00423697	-0.0174803
25.8	0.00189966	0.00497791	-0.00202239	0.00094164	-0.00158764	0.00144173	-0.0052679	-0.00312976	0.00698648	-0.00026638	-0.00788017	-0.0142093
26	0.00365436	0.00541092	0.00300647	0.00101523	0.00021649	0.00034437	-0.00525927	-0.00147349	0.00194384	-0.00102873	-0.00487459	-0.0185435
26.2	0.00325753	0.00376195	-0.00084442	0.00163464	0.00269772	-0.00093346	-0.00495738	-0.00253244	0.00621405	8.275e-05	-0.00375262	-0.0143421
26.4	0.00684973	0.00105221	-0.00078213	0.00144881	0.00349365	-0.00051447	-0.00281154	-0.00263852	0.00363353	-0.00192998	-0.00620841	-0.0159431
26.6	0.00563986	6.49e-05	-0.00304287	0.00142519	-1.579e-05	-0.00434834	-0.00472928	-0.00160274	0.00480126	-0.0011707	-0.00501296	-0.0162822
26.8	0.00733878	7.16e-06	-0.00077453	-0.00139648	-0.00148443	-0.00601091	-0.00719264	-0.00369791	0.00473367	-0.00015152	-0.00314251	-0.014025
27	0.00712419	0.00144358	-0.00021049	-0.00053453	0.00322405	-0.00342013	-0.00586869	-0.00218762	0.00356979	-0.0024471	-0.0121405	-0.0151395
27.2	0.00719978	1.797e-05	-0.00344902	0.00123422	0.0022408	0.00162973	-0.0017036	-0.00307774	0.002139	-0.00052885	-0.00446442	-0.0124646
27.4	0.00866942	0.00322881	-0.00112818	-0.00232787	0.0019135	0.00016539	-0.00349186	-0.00357169	0.00784917	-0.00259386	-0.00196357	-0.0139051
27.6	0.00060944	0.0053146	-0.00168032	-0.00189334	0.00284621	-0.00434654	-0.00606175	-0.00063757	0.00821238	-0.00115044	-0.00975407	-0.0207478
27.8	0.00731999	0.00052709	-0.00436595	-0.00436043	0.00177428	-0.0013374	0.00043352	-0.0041377	0.00715347	-0.0012041	-0.00778276	-0.0202998
28	0.00169418	0.00250393	-0.00328644	-0.00201767	0.00354482	-0.00309427	-0.00466167	-0.00342451	0.00591926	-0.00158578	-0.00414149	-0.0148112
28.2	0.00279675	0.00254123	-0.00303386	-0.000102	8.259e-05	0.00012461	-0.00370721	-0.00386786	0.00339443	-0.00063211	-0.00175791	-0.013723
28.4	0.00017101	0.00335357	-0.00190109	0.00302232	0.00401552	-0.00347495	-0.00481305	-0.00382471	0.00199215	-0.00398473	-0.00665686	-0.0171044
28.6	0.0043605	0.00451148	-0.00523853	-0.00131232	-0.0034028	-0.0025548	-0.00396151	-0.0003729	0.00351391	-0.00071798	-0.0111125	-0.0139718
28.8	0.00283673	0.0056038	-0.00166671	-3.788e-05	-0.00285212	-0.00140001	-0.00670488	-0.0064307	0.00316863	-0.00152112	-0.00814681	-0.0129644
29	0.00515376	-0.00133836	-0.00310904	-0.00702573	-0.00165096	-0.00334124	-0.00375083	-0.00334856	0.0013538	-0.00308349	-0.00696361	-0.0185719
29.2	0.00510583	0.00176035	0.00043187	0.00049922	-0.002593	0.00048856	-0.00234182	-0.00194115	0.00466839	-0.00229705	-0.00518187	-0.0153559
29.4	0.00518249	0.00188031	0.00065263	-0.00075476	0.00123574	-0.00354975	-0.00564651	-0.00504733	0.00423942	0.00205065	-0.00867187	-0.0141363
29.6	0.00464497	-0.00095924	0.00085683	-0.00043299	0.00054181	-0.00161092	-0.00955194	-0.00223752	0.00211286	-0.00156939	-0.00638097	-0.0149136
29.8	0.00488539	0.00085964	-0.00121062	-0.00238533	-0.00243596	-0.001544	-0.00318024	-0.00502638	0.00560643	-0.00402116	-0.00290373	-0.014509
30	0.00488539	0.00085964	-0.00121062	-0.00238533	-0.00243596	-0.001544	-0.00318024	-0.00502638	0.00560643	-0.00402116	-0.00290373	-0.014509

## Sheet: PCARE B Diss Curve rep 1
	Concentration (uM)
Time (s)	5	2.5	1.25	0.625	0.3125	0.15625	0.078	0
0	0.532525	0.488054	0.420755	0.343049	0.248673	0.166009	0.105446	0.00017787
0.2	0.464219	0.443648	0.38699	0.327242	0.242881	0.171979	0.100787	-0.0133363
0.39	0.421804	0.415835	0.362881	0.311582	0.23434	0.161907	0.0946478	-0.0115349
0.59	0.390226	0.387223	0.338641	0.297601	0.22307	0.158522	0.0938569	-0.00804231
0.79	0.371113	0.368618	0.324999	0.279918	0.219357	0.157611	0.0891931	-0.00672013
0.99	0.34503	0.342351	0.308224	0.268774	0.211129	0.152	0.0903579	-0.00734313
1.19	0.327452	0.326553	0.290399	0.258118	0.200594	0.147837	0.0859522	-0.00768306
1.39	0.310278	0.315002	0.276169	0.245615	0.193226	0.143983	0.0812145	-0.00591152
1.59	0.295319	0.300874	0.269685	0.235127	0.187001	0.134372	0.0853252	-0.00321734
1.79	0.28121	0.28612	0.253075	0.228267	0.176657	0.132981	0.0796157	-0.00472226
1.99	0.269455	0.270857	0.244492	0.217458	0.174101	0.128947	0.0756735	-0.00417675
2.19	0.257533	0.261622	0.233126	0.210733	0.165091	0.128061	0.070758	-0.0046325
2.39	0.251198	0.253143	0.224387	0.204113	0.164547	0.117341	0.0772664	-0.00652837
2.59	0.238612	0.242153	0.211608	0.196968	0.153729	0.116286	0.0724559	-0.00423967
2.79	0.23213	0.236454	0.209236	0.190414	0.151091	0.115367	0.0693218	-0.00506895
2.99	0.22562	0.225228	0.202112	0.182773	0.151217	0.108543	0.0676294	-0.00354363
3.19	0.214352	0.21704	0.19639	0.175959	0.139992	0.107478	0.0688742	-0.00634512
3.39	0.208485	0.21219	0.190102	0.171182	0.139426	0.105369	0.063499	-0.00766707
3.59	0.200138	0.204952	0.178431	0.162083	0.132638	0.0998552	0.0595694	-0.0061776
3.79	0.196949	0.195674	0.172599	0.158946	0.124863	0.0947015	0.0583796	-0.00505352
3.99	0.187653	0.186509	0.167977	0.156374	0.123998	0.098101	0.057478	-0.00886523
4.19	0.181046	0.186245	0.166081	0.145017	0.11831	0.0910744	0.054785	-0.0087615
4.39	0.178323	0.180281	0.160583	0.146054	0.117364	0.0876192	0.0568436	-0.0034987
4.59	0.171083	0.171033	0.154117	0.1393	0.117248	0.0873637	0.0539743	-0.00728273
4.79	0.168643	0.167407	0.150496	0.135678	0.111491	0.0860587	0.0545239	-0.0109067
4.99	0.160285	0.167799	0.142202	0.130661	0.106157	0.0845217	0.050521	-0.00163629
5.19	0.158783	0.162283	0.140941	0.128999	0.107659	0.0818474	0.0489991	-0.00291815
5.39	0.152299	0.149693	0.136762	0.125177	0.102971	0.0768988	0.0464273	-0.00628825
5.59	0.148276	0.149899	0.131521	0.118722	0.0985066	0.0755383	0.0436671	-0.00438759
5.79	0.147655	0.144141	0.129405	0.11916	0.0953349	0.0713163	0.0446834	-0.0038312
5.99	0.14166	0.143307	0.123532	0.116009	0.0945397	0.0717399	0.0455967	-0.00644749
6.19	0.140735	0.139928	0.12154	0.112443	0.0908367	0.0696516	0.0384842	-0.00820982
6.39	0.132559	0.133784	0.122	0.105259	0.0916276	0.0626325	0.0417389	-0.00518058
6.59	0.130395	0.130962	0.118629	0.104962	0.0859635	0.0598437	0.0383512	-0.00487835
6.79	0.126464	0.12681	0.109153	0.102474	0.0832514	0.0644232	0.0355415	-0.00735549
6.99	0.127716	0.122703	0.107424	0.0943748	0.0813596	0.0584764	0.0371496	-0.0101755
7.19	0.123512	0.117657	0.105149	0.0944716	0.0787736	0.0581685	0.0359521	-0.00734574
7.39	0.116805	0.121422	0.101126	0.0941013	0.0762034	0.0617918	0.0397449	-0.00742427
7.59	0.116691	0.11497	0.0986797	0.0931987	0.0752946	0.0524089	0.0350942	-0.00543194
7.79	0.114446	0.111354	0.0963652	0.0901852	0.0697347	0.0536219	0.0358892	-0.00587098
7.99	0.114161	0.107038	0.0894658	0.0840029	0.0666462	0.0547509	0.033694	-0.00685405
8.19	0.107253	0.107317	0.0916741	0.0855072	0.0695285	0.0537104	0.033645	-0.00791457
8.39	0.106909	0.104387	0.0903858	0.0825776	0.0674271	0.0508755	0.0302417	-0.00919403
8.59	0.105506	0.103287	0.0866955	0.0795582	0.0633832	0.0510694	0.0335596	-0.00755303
8.79	0.100405	0.0977118	0.0806135	0.0762229	0.0589152	0.0449723	0.0307766	-0.00649838
8.99	0.0991633	0.0955052	0.0857249	0.0777551	0.0624301	0.0442314	0.0301278	-0.00439288
9.19	0.0982259	0.0952956	0.0786358	0.0696431	0.0590986	0.0464089	0.0274381	-0.00656364
9.39	0.0967851	0.0915037	0.075295	0.07481	0.0580639	0.0400062	0.0268357	-0.00982295
9.59	0.0969811	0.0913191	0.0747926	0.0707634	0.0563053	0.0414389	0.0310024	-0.00541201
9.79	0.0915951	0.0905013	0.0737448	0.0700062	0.0540912	0.0432577	0.024316	-0.00893506
9.99	0.0912465	0.0859726	0.0729298	0.0707302	0.0518257	0.0407804	0.0228124	-0.0078813
10.19	0.0871519	0.0836907	0.0699384	0.0652472	0.0520521	0.0343183	0.0246538	-0.0034821
10.39	0.0866106	0.0837636	0.0691699	0.0644652	0.0523992	0.0380571	0.0220492	-0.00515117
10.59	0.0846716	0.0803284	0.0680203	0.0601458	0.0493225	0.0374261	0.0208059	-0.0101643
10.79	0.0877897	0.0817918	0.0653127	0.0612886	0.0434102	0.0380408	0.0245121	-0.00787448
10.99	0.0842781	0.0761292	0.0627881	0.0589222	0.0478304	0.0345524	0.0229501	-0.00328503
11.19	0.0798656	0.0758965	0.0620477	0.05477	0.0427282	0.0343162	0.0188363	-0.0083206
11.39	0.0772895	0.0730575	0.0610967	0.053232	0.0419427	0.0348473	0.0210373	-0.00806684
11.59	0.0763351	0.0737062	0.0582234	0.0551064	0.0440108	0.0350354	0.0178892	-0.00411383
11.79	0.0772994	0.0739898	0.0572901	0.0564358	0.0402548	0.0314614	0.0170284	-0.00990589
11.99	0.0727247	0.0699201	0.0598424	0.052634	0.0399183	0.0303283	0.0211165	-0.00879226
12.19	0.0713838	0.0655488	0.0555523	0.0507174	0.039372	0.0274722	0.0233652	-0.00567245
12.39	0.0701465	0.0680188	0.0564538	0.0492841	0.0426158	0.0266968	0.0192919	-0.00665285
12.59	0.0720769	0.0647534	0.0546425	0.0492411	0.0402127	0.0313184	0.0166152	-0.00566029
12.79	0.0709518	0.0633098	0.0524061	0.0462644	0.0329385	0.0248125	0.0187133	-0.00434393
12.99	0.0678909	0.062447	0.0531471	0.0430179	0.0362762	0.0236579	0.0178282	-0.0121365
13.19	0.0672538	0.0610942	0.0502881	0.0449016	0.0328517	0.0227971	0.0156207	-0.00300236
13.39	0.0701537	0.0594033	0.0487394	0.0444114	0.0340575	0.0208708	0.013654	-0.00896576
13.59	0.0702597	0.0577143	0.0491889	0.0450603	0.03219	0.0242081	0.013734	-0.00944417
13.79	0.0654655	0.05844	0.043604	0.0430516	0.0352716	0.0241559	0.0167115	-0.00580692
13.99	0.0627985	0.0580343	0.0440822	0.0373207	0.0325354	0.0240913	0.0134159	-0.00858004
14.19	0.0632822	0.0570109	0.0460872	0.0389318	0.0307579	0.0244582	0.0143449	-0.00444907
14.39	0.05998	0.0584855	0.0433118	0.0372183	0.0325227	0.0206966	0.0133137	-0.00648309
14.59	0.0628716	0.056527	0.044183	0.0383121	0.029521	0.0195105	0.0141586	-0.0063639
14.79	0.0600025	0.0516881	0.0401028	0.040239	0.0296739	0.023474	0.0156522	-0.00534656
14.99	0.0579238	0.0530408	0.0379572	0.0373952	0.0313519	0.0163677	0.0124265	-0.00648053
15.19	0.0594575	0.0508589	0.0401224	0.0395059	0.030091	0.0190515	0.0123257	-0.0107641
15.39	0.0569644	0.0511684	0.0425232	0.0354001	0.0234549	0.0194448	0.0119389	-0.0081275
15.59	0.0561944	0.0471319	0.0375265	0.030573	0.0239522	0.0186177	0.0130355	-0.00917309
15.79	0.0621609	0.0458066	0.0364773	0.0344779	0.023989	0.0190727	0.00812975	-0.0044052
15.99	0.0538271	0.0485977	0.0394875	0.0273937	0.0228182	0.0225425	0.0111434	-0.00454685
16.19	0.0568763	0.0459381	0.0361831	0.0325166	0.0239644	0.016666	0.00905791	-0.00795829
16.39	0.0567252	0.0460229	0.0386421	0.0275411	0.0222012	0.0131173	0.00867384	-0.00983317
16.59	0.053873	0.0419855	0.0344819	0.027596	0.0210504	0.0195598	0.00998166	-0.00753104
16.79	0.0543722	0.0456803	0.0335724	0.0287979	0.0200673	0.0157031	0.00761641	-0.00495844
16.99	0.0513212	0.0450384	0.0310527	0.0282258	0.0197936	0.0122259	0.00820122	-0.00670677
17.19	0.0505175	0.0445132	0.0318252	0.0307333	0.0184469	0.010443	0.00558465	-0.00673236
17.39	0.0545398	0.0412216	0.0327365	0.0298896	0.0192298	0.0138461	0.00875162	-0.00705234
17.59	0.0504917	0.0433579	0.031731	0.028549	0.0188344	0.0137973	0.00891892	-0.00866589
17.79	0.0533218	0.0448716	0.0317107	0.0208524	0.0213002	0.0141069	0.00996434	-0.0095558
17.99	0.0510377	0.0456386	0.0304033	0.0291107	0.0220487	0.0115039	0.00557788	-0.00973386
18.19	0.0517432	0.0435572	0.0322962	0.0230958	0.0197493	0.011447	0.00408153	-0.00570237
18.39	0.0463193	0.0419335	0.0342209	0.0230938	0.0191109	0.0112633	0.00773166	-0.00611793
18.59	0.0474246	0.0398491	0.0259378	0.0206268	0.0173674	0.0119026	0.00694587	-0.0038256
18.79	0.0494969	0.0434579	0.0253008	0.02315	0.0165647	0.0115936	0.00639897	-0.00584256
18.99	0.0458326	0.040258	0.0235778	0.0271133	0.0180859	0.0120347	0.00675367	-0.0050127
19.19	0.0523314	0.0360848	0.0245575	0.0179501	0.0164475	0.00848337	0.0091115	-0.00841665
19.39	0.0448006	0.0389387	0.0242093	0.0224991	0.0168903	0.0112089	0.00485884	-0.00559812
19.59	0.0468248	0.0345207	0.0232326	0.0245364	0.0178155	0.0127504	0.00078617	-0.0118218
19.79	0.0474679	0.0379711	0.0254971	0.0191671	0.0190072	0.011181	0.00541689	-0.00725461
19.99	0.045722	0.035719	0.022967	0.0215782	0.0104623	0.00908904	0.00508362	-0.00931919
20.19	0.0457917	0.0378229	0.0275556	0.0243408	0.0123133	0.0139283	0.00329038	-0.00576145
20.39	0.0477317	0.0354519	0.0265228	0.0227663	0.0165276	0.00820202	0.00592203	-0.00977859
20.59	0.0453519	0.0331662	0.0220825	0.021077	0.0126319	0.0073628	0.00312909	-0.0073568
20.79	0.0441855	0.0359786	0.0232839	0.0198364	0.015814	0.00587793	0.00164023	-0.0100445
20.99	0.0441467	0.0339914	0.0248507	0.0210835	0.0147708	0.00815486	0.00539458	-0.010043
21.19	0.0444485	0.0312565	0.0232397	0.0194859	0.0120144	0.0070001	0.00166546	-0.00688409
21.39	0.0429762	0.0316973	0.0254259	0.0183005	0.0157231	0.00748386	0.00974492	-0.00869292
21.59	0.043844	0.0316112	0.02246	0.0231282	0.0100733	0.00379945	0.00183688	-0.0130983
21.79	0.044926	0.0338894	0.020161	0.0168517	0.0126069	0.00799829	0.00217372	-0.0126557
21.99	0.0449076	0.0287819	0.0214649	0.0135523	0.0120582	0.0062158	0.0026684	-0.0110515
22.19	0.0409401	0.0297365	0.0222439	0.0187272	0.0148978	0.00790701	0.00411808	-0.0090155
22.39	0.0443059	0.0327548	0.0195757	0.0176375	0.0142874	0.00914357	0.00944198	-0.00782148
22.59	0.0414675	0.0300598	0.0158861	0.0148976	0.00938665	0.00732627	0.00015769	-0.00799846
22.79	0.0429804	0.029719	0.0196509	0.0119356	0.0140611	0.00699925	0.00393506	-0.0110418
22.99	0.0397542	0.0317716	0.0224611	0.0139329	0.0098128	0.00694139	0.00226084	-0.00779614
23.19	0.039707	0.0306739	0.0153374	0.0180405	0.00987567	0.0117699	0.00474368	-0.00761473
23.39	0.0394927	0.0314202	0.0211086	0.0205097	0.00862553	0.00776994	0.00398674	-0.00779095
23.59	0.0402174	0.0298584	0.0236425	0.0182872	0.00972658	0.00449516	0.00174401	-0.00788861
23.79	0.039647	0.0268966	0.022051	0.0189369	0.0074214	0.0025123	0.0003595	-0.00626916
23.99	0.0415693	0.025379	0.0225471	0.0146033	0.00939461	0.00623383	0.00097578	-0.0101164
24.19	0.0442026	0.0264406	0.0202371	0.0198185	0.00893279	0.00401465	0.00049909	-0.00891282
24.39	0.040155	0.0275031	0.020216	0.0148162	0.00849593	0.00271566	-0.00311471	-0.00604714
24.59	0.0375025	0.0291363	0.0166049	0.0156167	0.00759478	0.00325005	0.00584372	-0.00717904
24.79	0.0367911	0.027667	0.0157986	0.0122269	0.00558322	0.00535025	0.00260983	-0.0121469
24.99	0.0387439	0.0275786	0.0154011	0.0117342	0.00682023	0.00940737	-0.00441811	-0.00798931
25.19	0.0402897	0.0257814	0.0169938	0.0173535	0.00535337	0.00641987	-0.00078147	-0.0087673
25.39	0.0381151	0.029328	0.0171816	0.0116347	0.00727096	0.00067211	-0.00013759	-0.00859157
25.59	0.0373365	0.027102	0.0166611	0.015842	0.00658791	0.0031637	-0.00325424	-0.0118406
25.79	0.0366804	0.0251823	0.015595	0.0146687	0.00665688	-0.00077895	0.00078098	-0.0113404
25.99	0.039442	0.0242123	0.015609	0.0101902	0.00460195	0.00492527	0.00440345	-0.00841039
26.19	0.0370728	0.0258045	0.0117513	0.00870829	0.00437695	0.00060904	-0.00096946	-0.00649062
26.39	0.0398271	0.0246196	0.0188313	0.0108369	0.00427972	0.00439863	0.00183242	-0.00825154
26.59	0.0363534	0.0240454	0.0153135	0.0135785	0.00429073	0.00577424	0.00318657	-0.0112859
26.79	0.03862	0.0259579	0.0167214	0.0137822	-0.00058041	0.00177316	-0.0025735	-0.0110343
26.99	0.0373707	0.0212028	0.0156875	0.0116964	0.00947004	0.00313981	-0.00128385	-0.0093469
27.19	0.0351436	0.0254214	0.0101867	0.0128427	0.00600729	0.00276976	-0.00371938	-0.0106934
27.39	0.0381836	0.0229734	0.00952145	0.0140899	0.00530614	0.00021512	0.00037699	-0.0113964
27.59	0.0371738	0.0220785	0.0142311	0.012243	0.00586737	-0.00388861	-0.00267447	-0.00701796
27.79	0.038612	0.0272265	0.014176	0.0111379	0.00380437	0.00114455	-0.00168633	-0.0121137
27.99	0.0343625	0.0238379	0.0131893	0.0114444	0.00448208	0.00234337	0.0014359	-0.00637616
28.19	0.0365313	0.0257076	0.0133737	0.00624308	0.0078271	-0.00258086	-0.00260641	-0.0109748
28.39	0.0359777	0.022736	0.0136996	0.00816158	0.00063677	0.00331689	1.735e-05	-0.00925227
28.59	0.0355962	0.0233653	0.0157955	0.0157963	0.00412899	-0.00043438	0.00268643	-0.0107812
28.79	0.0359016	0.0209716	0.0150944	0.00728079	0.00490382	-0.00044861	-0.00062572	-0.0103708
28.99	0.0309452	0.0246233	0.0113052	0.0108525	0.00446361	-0.00030279	-0.00345015	-0.00974394
29.19	0.0345956	0.0238298	0.0165558	0.0107787	0.00525349	0.00146319	-0.0037274	-0.00773423
29.39	0.0379852	0.0226123	0.0168077	0.00748949	0.00205913	0.0011752	-0.00187085	-0.0048553
29.59	0.0371446	0.0218702	0.0114326	0.0102953	0.00320663	0.00070436	-0.00060731	-0.00666146
29.79	0.0361871	0.0226004	0.0103293	0.00762381	0.00276017	0.00256851	-0.00213262	-0.0101121
29.99	0.0361871	0.0226004	0.0103293	0.00762381	0.00276017	0.00256851	-0.00213262	-0.0101121

## Sheet: PCARE B Diss Curve rep 2
	Concentration (uM)
Time (s)	5	2.5	1.25	0.625	0.3125	0.15625	0.078	0
0	0.5073	0.464785	0.396879	0.338538	0.251209	0.168337	0.103716	-0.00735719
0.2	0.451921	0.413279	0.369062	0.320605	0.232857	0.157419	0.0934876	-0.00871083
0.39	0.416653	0.390109	0.344231	0.303419	0.223053	0.157861	0.0924067	-0.00671422
0.59	0.390961	0.365248	0.324	0.287965	0.219478	0.15259	0.0907022	-0.00850333
0.79	0.368493	0.346217	0.307416	0.277068	0.209486	0.147181	0.0880589	-0.00994727
0.99	0.347084	0.328502	0.291866	0.264058	0.203854	0.14463	0.0828395	-0.00721986
1.19	0.328376	0.313133	0.279552	0.25437	0.196077	0.137219	0.0833549	-0.00888619
1.39	0.315307	0.29955	0.269566	0.239772	0.188049	0.134683	0.0789103	-0.00212935
1.59	0.302053	0.2854	0.253307	0.232876	0.183871	0.13152	0.0769147	-0.00817755
1.79	0.288067	0.277223	0.245563	0.224386	0.177194	0.124976	0.0805274	-0.00501197
1.99	0.276046	0.266068	0.23436	0.217497	0.173323	0.124209	0.0736715	-0.007551
2.19	0.26497	0.254927	0.227557	0.210115	0.165289	0.118892	0.0734407	-0.00501444
2.39	0.256472	0.243759	0.220281	0.199024	0.160571	0.114972	0.0709127	-0.00704226
2.59	0.243922	0.235928	0.20845	0.191948	0.160232	0.114025	0.0676701	-0.0110591
2.79	0.234765	0.230609	0.199369	0.187249	0.152993	0.112835	0.0678562	-0.00699187
2.99	0.222965	0.219857	0.194344	0.184481	0.15014	0.103301	0.0637951	-0.00814543
3.19	0.218798	0.214109	0.186751	0.175991	0.142412	0.103933	0.060234	-0.00704733
3.39	0.211355	0.208008	0.183035	0.168281	0.138088	0.100276	0.0595497	-0.0084999
3.59	0.209693	0.201245	0.176233	0.166794	0.131587	0.0974122	0.06088	-0.00953744
3.79	0.202076	0.19465	0.16874	0.162028	0.134031	0.10024	0.0526409	-0.0105173
3.99	0.194288	0.189137	0.167131	0.150961	0.128139	0.0899176	0.0594678	-0.00708242
4.19	0.185507	0.183798	0.159112	0.147761	0.124316	0.088255	0.0572173	-0.0033123
4.39	0.181974	0.178772	0.152753	0.144259	0.122988	0.0874189	0.0506127	-0.00787224
4.59	0.184148	0.17195	0.152206	0.143561	0.116915	0.078496	0.0511643	-0.00834921
4.79	0.174984	0.169483	0.143539	0.135589	0.110705	0.0804941	0.0490698	-0.0117694
4.99	0.169609	0.164797	0.14349	0.135061	0.107687	0.0798098	0.0465727	-0.00892641
5.19	0.169461	0.160026	0.134624	0.129596	0.108929	0.0757545	0.0460992	-0.00695651
5.39	0.161533	0.155786	0.129301	0.124023	0.104282	0.0733489	0.0479079	-0.00549271
5.59	0.155558	0.15193	0.127415	0.118486	0.0994036	0.0701383	0.0464227	-0.0104609
5.79	0.153732	0.146232	0.12387	0.11545	0.0979678	0.0731234	0.0459745	-0.00809887
5.99	0.145137	0.14341	0.120382	0.111261	0.0964558	0.0690395	0.0456486	-0.0113471
6.19	0.146652	0.139798	0.120089	0.113232	0.0955079	0.0694073	0.0422397	-0.00744252
6.39	0.1497	0.140114	0.112472	0.10617	0.0909523	0.061544	0.0431678	-0.00665669
6.59	0.139689	0.1308	0.111536	0.105998	0.0890763	0.0615938	0.0411804	-0.0101426
6.79	0.134385	0.12833	0.107576	0.10481	0.0862737	0.06038	0.0367433	-0.00994414
6.99	0.131402	0.125734	0.105382	0.0970899	0.0857658	0.0582182	0.0358913	-0.00700477
7.19	0.128143	0.124322	0.103256	0.0961916	0.0836461	0.0580501	0.0349936	-0.00676609
7.39	0.125223	0.119565	0.102251	0.0953564	0.082197	0.0557175	0.0374805	-0.0113305
7.59	0.122749	0.116646	0.0982005	0.0887471	0.0757004	0.0550353	0.0351659	-0.00895071
7.79	0.12274	0.118535	0.0967712	0.0915199	0.0797805	0.0557662	0.0323024	-0.0101529
7.99	0.115188	0.113716	0.0916786	0.0868849	0.0737007	0.0512198	0.0317143	-0.0131465
8.19	0.115111	0.111471	0.0902691	0.0831515	0.0690537	0.052875	0.0325356	-0.00766502
8.39	0.111039	0.106716	0.0843036	0.0801755	0.0717947	0.0479089	0.0323283	-0.00723291
8.59	0.107392	0.104359	0.084764	0.0795536	0.0667728	0.0460922	0.0313318	-0.0110396
8.79	0.105898	0.105323	0.0833825	0.0772137	0.0649161	0.046163	0.0311637	-0.00682048
8.99	0.107677	0.101901	0.0811612	0.0780872	0.0649148	0.0474935	0.0216201	-0.00936929
9.19	0.105488	0.0969469	0.0745325	0.0726255	0.0621501	0.0450766	0.027469	-0.00804221
9.39	0.102569	0.0951033	0.0757269	0.0716668	0.0656473	0.0412869	0.0279664	-0.00895731
9.59	0.101674	0.0923956	0.0723425	0.0716735	0.0586684	0.0421562	0.0248389	-0.00901337
9.79	0.0963519	0.0960802	0.0718459	0.0684457	0.0550847	0.0384491	0.0265858	-0.00783226
9.99	0.093715	0.0900752	0.0718923	0.0690289	0.0563774	0.0386101	0.0280882	-0.0109524
10.19	0.0940632	0.0876772	0.0659497	0.0650087	0.0551881	0.0372729	0.0221356	-0.00912741
10.39	0.0938525	0.0844486	0.0673705	0.0626627	0.0538246	0.0369958	0.0197798	-0.011149
10.59	0.0936773	0.0831605	0.0680546	0.0587495	0.0510696	0.0376546	0.0210276	-0.0110776
10.79	0.0840851	0.0809616	0.0633385	0.0594902	0.0510781	0.0360437	0.0213156	-0.0100158
10.99	0.0867807	0.079592	0.0642457	0.0575386	0.0502066	0.0322973	0.0216673	-0.00717943
11.19	0.0857656	0.0771048	0.0585959	0.0581255	0.0492229	0.0303108	0.0181053	-0.00849741
11.39	0.086098	0.0772409	0.0574875	0.0534817	0.0470144	0.0347382	0.0196832	-0.00770405
11.59	0.0808977	0.0730019	0.0600155	0.0528681	0.0441079	0.0341738	0.0184595	-0.0087002
11.79	0.0812191	0.0712996	0.055339	0.0509023	0.0409383	0.0330921	0.0183539	-0.0122861
11.99	0.0793058	0.0738592	0.0542974	0.0485708	0.0441014	0.0308934	0.0180452	-0.013447
12.19	0.0783153	0.0757428	0.0525882	0.0450422	0.0410082	0.02774	0.0170884	-0.0102044
12.39	0.079554	0.0713112	0.051942	0.0532078	0.0393894	0.0270786	0.0168445	-0.00860653
12.59	0.0761287	0.0694934	0.047998	0.0439415	0.0391118	0.0264536	0.0165402	-0.00671415
12.79	0.0736239	0.064536	0.0482092	0.050425	0.0413413	0.0266974	0.0143595	-0.00795807
12.99	0.0771463	0.0634098	0.0476791	0.0439995	0.035594	0.0237038	0.013141	-0.0102611
13.19	0.0698134	0.0654846	0.0466273	0.0424198	0.0358822	0.025423	0.0138953	-0.00773729
13.39	0.0686072	0.0616198	0.0435848	0.0471936	0.0330929	0.0213928	0.0101944	-0.0120685
13.59	0.0696226	0.0618842	0.044849	0.0458378	0.034875	0.0253431	0.0131645	-0.00640109
13.79	0.0714841	0.0619572	0.0433411	0.0438639	0.0317883	0.0224722	0.0130306	-0.0107773
13.99	0.0642364	0.0592172	0.0389911	0.0388246	0.0341845	0.019705	0.0139181	-0.0138865
14.19	0.0722809	0.0586643	0.0450894	0.0406253	0.0301574	0.0223543	0.012345	-0.0114779
14.39	0.0675992	0.0587236	0.0386521	0.0353821	0.0321548	0.0188008	0.00886462	-0.00876034
14.59	0.0629034	0.0557511	0.0387867	0.0362387	0.0308568	0.0218672	0.00795043	-0.0118067
14.79	0.0664199	0.0538851	0.0372016	0.0318381	0.0275657	0.0196528	0.0116679	-0.0104899
14.99	0.0592341	0.057306	0.0375236	0.0308412	0.0286369	0.0192277	0.00868664	-0.00791723
15.19	0.0617074	0.0533072	0.0322294	0.0314987	0.0311091	0.017637	0.00916707	-0.00886193
15.39	0.0603772	0.0505025	0.0351118	0.0341346	0.024098	0.0130508	0.0100186	-0.0135817
15.59	0.0597935	0.0515885	0.0324485	0.0321007	0.0257237	0.0141054	0.00751004	-0.0113509
15.79	0.0580736	0.0505159	0.0335257	0.0324851	0.0260553	0.016878	0.0100196	-0.00676063
15.99	0.0573765	0.0463853	0.0301915	0.0290715	0.0259372	0.0179239	0.00497728	-0.0104895
16.19	0.0595981	0.0461349	0.0347279	0.0275735	0.0224886	0.0121216	0.00767508	-0.0101968
16.39	0.0568062	0.0505727	0.0345018	0.0284899	0.0209203	0.0141506	0.00701473	-0.00995156
16.59	0.0563548	0.0461597	0.0328023	0.0249375	0.0206007	0.015171	0.0104345	-0.0135295
16.79	0.0547438	0.0451737	0.03595	0.0262897	0.0234474	0.0159487	0.00539696	-0.0112908
16.99	0.0529453	0.0481101	0.0306364	0.0264778	0.0216954	0.0110764	0.00448019	-0.012927
17.19	0.0551917	0.0488223	0.0299973	0.0239661	0.0172403	0.012399	0.00024165	-0.0118094
17.39	0.0551963	0.0450738	0.0260413	0.0260479	0.0191518	0.00689227	0.00371845	-0.0145261
17.59	0.0510115	0.042809	0.0267484	0.0243086	0.0187339	0.0120694	0.00330504	-0.0119953
17.79	0.0483906	0.0407038	0.0274733	0.0215975	0.0188942	0.00956413	0.00441613	-0.0114466
17.99	0.0493596	0.0423842	0.0263867	0.0262745	0.0172918	0.00809985	0.00656629	-0.0121807
18.19	0.0489674	0.0420031	0.0260837	0.0210028	0.0188135	0.0105402	0.00336669	-0.0133876
18.39	0.0467202	0.0342139	0.0285141	0.0240493	0.0184666	0.0092987	0.00229041	-0.0129911
18.59	0.0501456	0.0423915	0.0251436	0.0184137	0.0135137	0.010241	-0.00025585	-0.0112341
18.79	0.0444514	0.0414639	0.0244154	0.0206504	0.0134327	0.0093535	0.00403399	-0.0104286
18.99	0.0456635	0.0347659	0.021052	0.0183118	0.0159602	0.00902791	0.00325799	-0.011391
19.19	0.0454203	0.0380406	0.0203252	0.0226	0.0153943	0.0078708	0.00175411	-0.0131951
19.39	0.0459871	0.0344577	0.0235846	0.0213364	0.0130776	0.00494143	0.00228071	-0.00824453
19.59	0.0477503	0.0375596	0.0236968	0.0171917	0.0183408	0.00578804	0.00096907	-0.00816653
19.79	0.0464355	0.0369724	0.0221179	0.0213326	0.0148119	0.00583036	0.00259297	-0.00920948
19.99	0.0452162	0.0371839	0.0189061	0.0149073	0.0137795	0.00491421	0.00095777	-0.0129856
20.19	0.0448319	0.0338364	0.017362	0.0153781	0.00974601	0.0062784	0.00158734	-0.00880137
20.39	0.0407531	0.0374145	0.0168036	0.0134279	0.0127823	0.00616665	0.00291497	-0.0122197
20.59	0.0461378	0.031767	0.0146689	0.0169273	0.0137182	0.00743641	-0.00150948	-0.00931721
20.79	0.0413078	0.0294105	0.0167166	0.0129578	0.00935761	0.00399189	-0.002778	-0.0124199
20.99	0.0406799	0.0282402	0.0162609	0.0119416	0.00775414	0.00118574	0.00251954	-0.0134523
21.19	0.0443515	0.0306654	0.0165167	0.016098	0.00945161	0.00454048	0.00484502	-0.0145261
21.39	0.0438093	0.0343159	0.0178117	0.00997212	0.0109421	0.0005158	0.00090296	-0.0128133
21.59	0.0417981	0.0319855	0.013937	0.016694	0.00604591	0.00424086	-0.003694	-0.0167385
21.79	0.041264	0.0324346	0.0151784	0.0165306	0.00764592	0.0039922	-0.00142466	-0.0112169
21.99	0.0456485	0.0270026	0.0118944	0.0122147	0.00802434	1.755e-05	-0.00041998	-0.0153691
22.19	0.037789	0.0308101	0.0117483	0.0106239	0.00644159	0.0018878	-0.00412027	-0.0134843
22.39	0.0421446	0.0294474	0.0125782	0.0114509	0.00262497	0.00313712	-0.00012507	-0.00933664
22.59	0.0409762	0.031212	0.0117202	0.0136537	0.00544983	0.00141141	-0.00106809	-0.0120961
22.79	0.0365488	0.0278458	0.0071157	0.00977433	0.00899759	0.00035978	-0.00398476	-0.0109273
22.99	0.0392543	0.0287387	0.0131457	0.00982699	0.00561811	0.00555212	-0.0030404	-0.0138488
23.19	0.0357194	0.0296099	0.00858631	0.00848264	0.00504541	0.0004733	-0.0036697	-0.0147244
23.39	0.0381566	0.0281434	0.0130447	0.00875215	0.00652315	0.00192027	-0.00668647	-0.0131253
23.59	0.0403672	0.0288181	0.013055	0.00543365	0.0104861	-0.00122236	-0.00893023	-0.0111477
23.79	0.0398921	0.0240348	0.0136921	0.00604227	4.451e-05	0.00454775	-0.00155126	-0.0136106
23.99	0.0374728	0.0254899	0.00642453	0.0100878	0.00171201	0.00082033	-0.010588	-0.0168579
24.19	0.0354204	0.0238591	0.00895697	0.011564	0.00225707	-0.00171654	-0.00016223	-0.011389
24.39	0.0357049	0.0254936	0.00910811	0.00615899	0.00715718	0.00141727	-0.00250883	-0.0138209
24.59	0.035212	0.0237604	0.0103593	0.00521537	0.00388538	-0.00376084	-0.00517579	-0.0132342
24.79	0.038319	0.0232877	0.00810797	0.00731942	0.00312918	-0.00102832	-0.00054693	-0.013436
24.99	0.0360723	0.02421	0.0089127	0.00709836	0.00486806	-0.00345889	-0.00776148	-0.0143341
25.19	0.0334945	0.0248014	0.00905385	0.00505929	0.000736	-1.268e-05	-0.0049187	-0.0129278
25.39	0.0325783	0.0227707	0.00821465	0.00354082	-0.00158113	-0.00308924	-0.00606366	-0.0152346
25.59	0.0336352	0.0174295	0.012247	0.0060379	-0.0014253	-0.00241033	-0.00558224	-0.0132968
25.79	0.0338261	0.0207184	0.00777439	0.00586518	-0.00143511	-0.00192853	-0.00672736	-0.0127424
25.99	0.0356762	0.0178266	0.00654746	0.00338648	0.00425537	-0.00182298	-0.00349417	-0.0151523
26.19	0.0335937	0.0235068	0.00945159	0.0068378	-0.00024023	-0.00463314	-0.00658433	-0.0120084
26.39	0.0286389	0.0201545	0.00808972	0.00452245	0.00106564	-0.00338233	-0.00869248	-0.0146881
26.59	0.0326318	0.0224987	0.00833184	0.00284701	0.00126882	0.00126209	-0.00285651	-0.0158788
26.79	0.0296655	0.0178274	0.00787164	0.00211087	0.00032813	-0.00133643	-0.00501432	-0.0131393
26.99	0.0319573	0.0185568	0.00500978	0.00678047	0.00172406	-0.00117513	-0.00424882	-0.013628
27.19	0.0356787	0.0214644	0.00199603	0.00123537	0.00059612	-0.00495999	-0.00982668	-0.0099247
27.39	0.0299104	0.0233384	0.00693366	0.0038818	0.00139465	-0.00517411	-0.0101173	-0.0108286
27.59	0.0310402	0.0164379	0.00310807	0.00448512	-0.00091121	-0.00307956	-0.00655632	-0.0129873
27.79	0.0305113	0.0164727	0.0059191	0.00455184	-0.00014635	-0.00413737	-0.00702246	-0.0191355
27.99	0.0308204	0.0208458	0.00725085	0.00286664	-0.0006846	-0.00336145	-0.00511686	-0.0131779
28.19	0.0269656	0.0211549	0.00602176	0.00179477	-0.00048518	-0.00828663	-0.00778806	-0.0132367
28.39	0.0311932	0.0216153	0.00768675	0.00360271	-0.0018012	-0.00617799	-0.00829279	-0.015087
28.59	0.0348567	0.0174252	0.00409641	0.00701284	0.00074342	-0.00430355	-0.00422781	-0.011102
28.79	0.0286638	0.0189732	0.00809745	0.00145136	0.00163364	-0.00478606	-0.0116306	-0.0129808
28.99	0.0301907	0.0164153	0.00520433	-0.00025007	-0.00103903	-0.00316399	-0.0095328	-0.0159189
29.19	0.028592	0.0190797	0.00241695	-0.0030134	-0.00174964	-0.00658607	-0.00760763	-0.00893095
29.39	0.0263122	0.0179187	0.00461175	0.00176547	-0.0001377	-0.00307079	-0.00717766	-0.0163559
29.59	0.0343207	0.0200992	0.00485053	0.00363983	-0.0044531	-0.00493218	-0.00964384	-0.0119936
29.79	0.0326491	0.0185714	0.00642259	0.00292057	0.0001477	-0.00439474	-0.00767504	-0.0191897
29.99	0.0305447	0.0161428	0.00271956	0.00158285	-0.00183047	-0.00729998	-0.0114076	-0.0151123

## Sheet: ABI1-LPP Diss Curve rep 1
	Concentration (uM)
Time (s)	5	2.5	1.25	0.625	0.3125	0.15625	0.078	0
0	0.508469	0.421363	0.337222	0.255926	0.173302	0.114445	0.0770772	0.00614618
0.2	0.432912	0.364485	0.305784	0.242949	0.174358	0.111663	0.0634107	-0.00557792
0.41	0.383984	0.324094	0.282209	0.222996	0.161004	0.104904	0.0637697	-0.00236367
0.61	0.350874	0.296774	0.258971	0.20482	0.15119	0.100104	0.063844	-0.00765853
0.81	0.316119	0.269839	0.236546	0.188772	0.138905	0.0914334	0.0586263	-0.00266773
1.01	0.288497	0.251113	0.217728	0.179885	0.131855	0.0892956	0.0522869	-0.00190633
1.21	0.266927	0.232982	0.20551	0.1712	0.124922	0.0802386	0.0486935	-0.0035317
1.41	0.250479	0.218636	0.188227	0.156858	0.112989	0.0755856	0.0470525	-0.00318325
1.61	0.240837	0.20117	0.176509	0.143028	0.109587	0.0726104	0.0494194	-0.00597545
1.81	0.223921	0.191427	0.163525	0.138348	0.103458	0.0727894	0.0461264	-0.00671648
2.01	0.208252	0.179416	0.154047	0.128976	0.09704	0.0706037	0.0385964	-0.00714548
2.21	0.19374	0.16804	0.145826	0.121516	0.0922056	0.0629128	0.0426292	-0.00610875
2.41	0.189186	0.161058	0.137513	0.112604	0.0873884	0.0614676	0.0388573	-0.00122559
2.61	0.177816	0.150155	0.128983	0.107861	0.0869685	0.0597393	0.0338985	-0.00159646
2.81	0.16905	0.149366	0.123869	0.103008	0.0786134	0.0522501	0.0348222	-0.0061789
3.01	0.162733	0.13835	0.11704	0.0941218	0.0730589	0.0545614	0.0312989	-0.00383419
3.21	0.153602	0.128782	0.11219	0.0923302	0.0710814	0.0462951	0.0324287	-0.00560182
3.41	0.149156	0.129466	0.106478	0.0884246	0.0668185	0.0468278	0.0276369	-0.00360003
3.61	0.143235	0.124142	0.0991122	0.0836575	0.0606266	0.0412925	0.0250012	-0.00355357
3.81	0.13978	0.113308	0.096825	0.076641	0.0588163	0.0401116	0.02734	-0.00829001
4.01	0.132555	0.112351	0.0949351	0.0715287	0.0583539	0.0394488	0.0249363	-0.0028012
4.21	0.131348	0.108727	0.0935045	0.074667	0.0564685	0.0378465	0.0263271	-0.00568235
4.41	0.121773	0.102749	0.0806761	0.0671053	0.054707	0.0373273	0.0262299	-0.0042911
4.61	0.118331	0.0995865	0.082727	0.0618274	0.0509842	0.0336526	0.0199817	-0.00444533
4.81	0.115776	0.0981178	0.0744009	0.0644323	0.0478167	0.0327853	0.020666	-0.00421256
5.01	0.1104	0.0883318	0.0763806	0.0597674	0.0492377	0.0345403	0.0190441	-0.00648852
5.21	0.109114	0.0905993	0.0722733	0.0594728	0.0420905	0.0318006	0.0192237	-0.00388036
5.41	0.10366	0.0861478	0.0674206	0.0535553	0.0396807	0.0297511	0.0212893	-0.00651839
5.61	0.104072	0.0869813	0.0654451	0.0571929	0.0423996	0.0255524	0.0206444	-0.00609154
5.81	0.102057	0.0799934	0.0642458	0.0522023	0.0401853	0.0254495	0.0195076	-0.00729651
6.01	0.0972035	0.0807882	0.0615139	0.0507655	0.0342151	0.0292793	0.017849	-0.00528859
6.21	0.096259	0.0747967	0.057906	0.0447829	0.0353269	0.0284507	0.0145561	-0.00616477
6.41	0.0910006	0.0752489	0.0564547	0.0461271	0.0324564	0.0253005	0.0186008	-0.00373414
6.61	0.0916607	0.0686598	0.0535694	0.0447012	0.0344434	0.0198966	0.0191001	-0.00443412
6.81	0.0921679	0.070083	0.0555759	0.0434283	0.0302743	0.023518	0.0163925	-0.00493741
7.01	0.0911848	0.0692891	0.0539866	0.035569	0.0297531	0.0215388	0.0167603	-0.00798026
7.21	0.0882333	0.068494	0.0501035	0.0408247	0.0256357	0.0209039	0.0123184	-0.00657214
7.41	0.08571	0.0639542	0.0482226	0.033199	0.0289035	0.0184964	0.011802	-0.00796314
7.61	0.084213	0.0675994	0.0457729	0.0413281	0.0308389	0.0165541	0.0126475	-0.00929477
7.81	0.0779589	0.0620076	0.043115	0.0320262	0.0269367	0.0163685	0.00678216	-0.00493138
8.01	0.0798559	0.0619363	0.0459495	0.0345905	0.0267901	0.0180927	0.0116232	-0.00642544
8.21	0.0773823	0.0595807	0.041932	0.0299444	0.0225186	0.0173437	0.0100513	-0.00494794
8.41	0.0747984	0.0554843	0.0386907	0.0352542	0.0228784	0.016374	0.0138875	-0.0070406
8.61	0.0726838	0.0546634	0.043653	0.0308351	0.0213261	0.0134632	0.00899992	-0.0058828
8.81	0.0730855	0.054975	0.0345336	0.0312864	0.0222469	0.0161715	0.00690078	-0.00662571
9.01	0.0723613	0.055482	0.0350521	0.0248792	0.0180616	0.0132563	0.0108017	-0.00566147
9.21	0.0695815	0.0532406	0.0370546	0.0290029	0.0191566	0.0141375	0.00838877	-0.0065403
9.41	0.0717365	0.0579254	0.0403503	0.0256485	0.0195015	0.0103477	0.00789144	-0.00478813
9.61	0.0716265	0.0539881	0.0375101	0.0262394	0.0167204	0.012487	0.0133648	-0.00654835
9.81	0.0706379	0.0495006	0.0364412	0.0233064	0.0197451	0.0112546	0.00785474	-0.0062631
10.01	0.0658222	0.0494082	0.0315594	0.0252393	0.0190241	0.0120877	0.00847229	-0.00458189
10.21	0.0678537	0.0522069	0.033676	0.020283	0.0134616	0.0104736	0.00321217	-0.00473655
10.41	0.0647463	0.0538385	0.029469	0.0230338	0.0152862	0.0134914	0.00845309	-0.00693238
10.61	0.0642852	0.0500951	0.0322086	0.0202526	0.0172899	0.0132221	0.00631952	-0.00889253
10.81	0.0669792	0.0474704	0.0300302	0.0244302	0.0123417	0.0105848	0.00804658	-0.00568734
11.01	0.0627244	0.0450549	0.0295084	0.0222065	0.0138321	0.011901	0.00651256	-0.00688211
11.21	0.0658331	0.0455886	0.0275185	0.0209958	0.0156543	0.00660515	0.00482867	-0.00415602
11.41	0.0632907	0.0480541	0.0315463	0.0165155	0.0126771	0.00762855	0.00276374	-0.00472446
11.61	0.0584019	0.043466	0.0310733	0.0201424	0.0142097	0.0104394	0.00511631	-0.00382841
11.81	0.0623418	0.046326	0.0303322	0.0218412	0.0125915	0.00704936	0.0075275	-0.00678206
12.01	0.0640233	0.046906	0.0254373	0.0173908	0.0162194	0.0131785	0.00556741	-0.0005404
12.21	0.0602603	0.0475016	0.0294332	0.0189935	0.0136662	0.0100172	0.00579311	-0.00658341
12.41	0.0599593	0.0418542	0.0260038	0.0182098	0.0107861	0.00784614	0.00629027	-0.012341
12.61	0.0596005	0.0417795	0.0257949	0.0221325	0.0149395	0.00891651	0.00769816	-0.00888731
12.81	0.0604304	0.0401775	0.0203864	0.0181653	0.0123647	0.00833028	0.00221515	-0.0045968
13.01	0.0624669	0.0408086	0.0262368	0.0181857	0.0101404	0.00748484	0.00268021	-0.00518462
13.21	0.0560577	0.0404301	0.0250284	0.0150176	0.00894621	0.00480833	0.00235067	-0.00621056
13.41	0.0597539	0.0407624	0.0218661	0.0158933	0.00731616	0.00792712	0.00535622	-0.00579171
13.61	0.0601303	0.0390523	0.0256256	0.0143275	0.0125204	0.00622138	0.0030532	-0.00754667
13.81	0.056448	0.0369001	0.0275129	0.0128058	0.0119778	0.00602066	0.00541124	-0.005842
14.01	0.0558227	0.0418366	0.026386	0.0152645	0.0113978	0.00524313	0.00138344	-0.00849396
14.21	0.054533	0.0417824	0.0228743	0.0161653	0.00921916	0.00634622	0.00464514	-0.00611611
14.41	0.0568436	0.0397571	0.0268945	0.0178891	0.00569564	0.00798172	0.00648625	-0.00943619
14.61	0.05514	0.0419442	0.0218525	0.0160432	0.00983584	0.0104899	0.00313638	-0.00647197
14.81	0.0492445	0.0397714	0.0214327	0.0156442	0.0064026	0.00599762	-0.00017171	-0.00822306
15.01	0.0572617	0.0421664	0.0247695	0.0151709	0.00802832	0.0053888	0.00497094	-0.00740354
15.21	0.0598039	0.0376996	0.0239249	0.0164545	0.0101435	0.00427815	0.0050226	-0.00872417
15.41	0.0571753	0.0382813	0.0200166	0.0158581	0.0100919	0.00829826	0.0029981	-0.00627296
15.61	0.0516108	0.0387772	0.0205921	0.0135238	0.00642177	0.00388386	0.00360499	-0.00988466
15.81	0.0553487	0.0397936	0.0229677	0.0177339	0.00944303	0.00630387	0.00188179	-0.00630391
16.01	0.0546432	0.0373209	0.0208578	0.0116117	0.00960111	0.00957147	0.00697198	-0.00663292
16.21	0.0524217	0.0395837	0.0180288	0.0146615	0.0107922	0.00834128	0.00407324	-0.0105906
16.41	0.0529522	0.0416112	0.0213972	0.0113876	0.0124367	0.00741517	0.00243709	-0.00414298
16.61	0.05343	0.0354083	0.0238139	0.0123893	0.0113345	0.00695827	0.00197817	-0.00605816
16.81	0.0556883	0.0361348	0.0212484	0.0117478	0.00801703	0.00573243	0.00387302	-0.00984742
17.01	0.0559699	0.0353192	0.0215301	0.0129717	0.00676236	0.00339008	0.00453946	-0.00654143
17.21	0.0539197	0.0381383	0.0185739	0.0132397	0.00762963	0.00261856	0.00212134	-0.00674584
17.41	0.0550197	0.036491	0.0216543	0.0156851	0.0067698	0.00235142	0.00448328	-0.00532674
17.61	0.0531248	0.0366072	0.0212985	0.0125548	0.0121283	0.00908274	0.00453191	-0.0079956
17.81	0.0548912	0.0376705	0.0237331	0.0127482	0.0086576	0.00644306	0.00314984	-0.00781723
18.01	0.0553208	0.040421	0.0220622	0.0156855	0.0081744	0.00485779	0.00432201	-0.00886192
18.21	0.0545972	0.0354588	0.0250012	0.0140229	0.00546364	0.0059809	0.00103534	-0.00941455
18.41	0.0562113	0.0368096	0.0220069	0.0128095	0.00891949	0.00221716	0.00113973	-0.00667373
18.61	0.0536215	0.0363836	0.0211486	0.0132721	0.00761684	0.00412011	0.00356158	-0.00818665
18.81	0.0541379	0.0345478	0.0210849	0.0137953	0.010172	-0.0009565	0.00276576	-0.00815176
19.01	0.0536139	0.0370937	0.0198073	0.014514	0.00731075	0.00694473	0.00197994	-0.0116758
19.21	0.0566951	0.0342503	0.0211021	0.0117217	0.00286903	0.00077126	0.00155703	-0.00937797
19.41	0.050514	0.034169	0.0192699	0.0120641	0.00679411	0.00211837	0.00068552	-0.0113143
19.61	0.0519967	0.0358347	0.0199022	0.00901098	0.00664571	0.00189391	0.00198753	-0.00985383
19.81	0.0525992	0.0378233	0.0197728	0.0131631	0.00778605	0.00539431	-0.00082019	-0.00977428
20.01	0.0530627	0.0361739	0.0221447	0.0115907	0.00586608	0.00781966	0.00347507	-0.00906865
20.21	0.0504535	0.0371807	0.0187885	0.0101196	0.00697683	0.00459631	0.00299867	-0.0050008
20.41	0.0503331	0.0380629	0.0175048	0.0102525	0.00676661	0.0023101	0.00028299	-0.00960492
20.61	0.0545967	0.0366963	0.0181226	0.0137392	0.00438666	0.00066222	0.00361839	-0.00864618
20.81	0.0490007	0.0385804	0.0171776	0.0121953	0.0079786	0.00694973	0.0040297	-0.0108312
21.01	0.0513894	0.0340432	0.0193339	0.0082942	0.00846544	0.00401483	0.00303096	-0.00996578
21.21	0.053981	0.0357699	0.0212474	0.0119246	0.00672187	0.00573439	0.00091744	-0.00764943
21.41	0.0488335	0.0310967	0.0164353	0.0126329	0.00527834	0.00524804	0.00374903	-0.00990832
21.61	0.0530804	0.0334692	0.0190718	0.015411	0.00628154	0.0033569	0.00592478	-0.0121899
21.81	0.0517021	0.0355102	0.0180497	0.0133394	0.00617818	0.00187474	0.00251131	-0.00938001
22.01	0.049926	0.0357333	0.0193586	0.0122561	0.00803015	-0.00107268	0.0046443	-0.00691082
22.21	0.0519509	0.0319333	0.0161998	0.0141375	0.00438129	-3.531e-05	0.00153199	-0.00722403
22.41	0.0514112	0.0344825	0.0155292	0.0132401	0.00240765	0.00591824	0.00549754	-0.00901199
22.61	0.0513137	0.0355857	0.0186813	0.0112299	0.00597619	0.00375673	0.00392266	-0.00863499
22.81	0.0502046	0.0343892	0.0189054	0.0123794	0.00433375	0.00490731	0.00360159	-0.00978843
23.01	0.0505491	0.034956	0.0185891	0.0161706	0.00614832	0.00257545	0.00332189	-0.00826184
23.21	0.0540355	0.034522	0.0202628	0.0118168	0.00590803	0.0050143	0.00341741	-0.00786513
23.41	0.0529541	0.0375509	0.019119	0.0143692	0.00311143	0.00631305	0.00241246	-0.00936933
23.61	0.051034	0.0348014	0.0161275	0.00977778	0.00561159	0.00078585	0.00162835	-0.00856716
23.81	0.0529864	0.0333328	0.0183412	0.00916264	0.00419943	-0.00150658	0.00139152	-0.0106481
24.01	0.0511066	0.0351572	0.021132	0.0115561	0.00637169	0.00222197	0.0012674	-0.009317
24.21	0.0537142	0.0389305	0.0159425	0.00976473	0.00277519	0.0018669	0.00191691	-0.010064
24.41	0.0523516	0.0364768	0.020368	0.0129539	0.00661926	0.00076837	0.00333812	-0.0123158
24.61	0.0509297	0.0339034	0.019478	0.0140938	0.00439134	0.00311206	0.00118451	-0.00829804
24.81	0.0515612	0.0332117	0.0155471	0.0119342	0.00324689	0.00168061	-0.00017978	-0.00922486
25.01	0.0485319	0.0340314	0.0168336	0.0133973	0.00339139	0.00612183	0.0023623	-0.0105707
25.21	0.05365	0.0334232	0.018545	0.00954872	0.0076096	0.00708517	0.00546857	-0.0125015
25.41	0.0503229	0.030311	0.0175901	0.0115311	0.00538238	0.00507168	0.00129638	-0.0100734
25.61	0.0502937	0.0342863	0.0155387	0.00939429	0.00400583	0.00230506	0.00267985	-0.0080511
25.81	0.0514679	0.0333688	0.0183944	0.0110534	0.0034989	0.00376185	0.00612773	-0.0112376
26.01	0.0512643	0.0331909	0.0212318	0.0100155	0.00632678	0.00403252	0.00065246	-0.00586215
26.21	0.0494258	0.0345883	0.0191054	0.0102065	0.00353026	0.00603307	0.00569117	-0.0101725
26.41	0.0467228	0.0340877	0.0182402	0.00845162	0.00195497	0.00662734	0.00171519	-0.0103944
26.61	0.0484127	0.0334335	0.0189427	0.00922549	0.00249297	0.00547451	-0.00017635	-0.0109051
26.81	0.0492172	0.0335292	0.0176963	0.0143666	0.00481063	0.00057037	0.00081602	-0.0107256
27.01	0.0428704	0.0317124	0.0138883	0.00580304	0.00561934	0.00313028	0.00335141	-0.00983256
27.21	0.0492562	0.0322079	0.0206385	0.0111898	0.00264655	0.00371054	0.0023754	-0.00964076
27.41	0.0472304	0.0353883	0.0180472	0.0101348	0.00735182	0.00396106	0.00303869	-0.00634984
27.61	0.0457639	0.032393	0.0150482	0.0105309	0.00589666	0.00054992	-0.00234871	-0.0120129
27.81	0.0544162	0.0358196	0.0141953	0.0132787	0.00667469	0.00373216	0.00044862	-0.00627699
28.01	0.0512907	0.0326478	0.017132	0.0118313	0.00709165	0.00539456	0.00088923	-0.0100415
28.21	0.0514414	0.0333799	0.0155856	0.0111285	0.00615243	0.00454691	0.00180823	-0.0122222
28.41	0.0479246	0.0364906	0.0148704	0.00989459	0.00471449	0.00466636	-0.00016131	-0.0106074
28.61	0.0526169	0.03248	0.0188637	0.0146748	0.00310154	0.002572	0.00186633	-0.00747284
28.81	0.0473478	0.0320428	0.0164547	0.0108832	0.0051535	0.00405001	0.00334629	-0.00908449
29.01	0.0495092	0.0319179	0.0187556	0.00811339	0.0009403	-0.00033563	0.00185088	-0.00933359
29.21	0.0470411	0.0339938	0.0145081	0.0080958	0.00133239	0.00236419	0.002216	-0.00974083
29.41	0.0494942	0.0304506	0.0165601	0.0102921	0.00336579	0.00236148	0.00072743	-0.00925449
29.61	0.0452118	0.031862	0.0143569	0.00795259	0.00264785	-4.49e-06	0.00128806	-0.0141599
29.81	0.0492386	0.0341039	0.017877	0.00951757	0.00604489	-0.00070939	0.00124654	-0.0136262
30.01	0.0523351	0.0341776	0.0167746	0.00912223	0.00480445	0.00109416	0.00216512	-0.00869137
30.21	0.0499518	0.0322845	0.0170542	0.0108487	0.00109581	0.0027278	0.00047467	-0.00825722
30.41	0.0551159	0.031467	0.0154853	0.00948613	0.0101473	0.00476923	-0.00121026	-0.0137327
30.61	0.0492489	0.0346295	0.0124249	0.00975159	0.0040393	0.00566869	-0.00167795	-0.0126277
30.81	0.0496846	0.0323965	0.0168194	0.00738116	0.00481355	0.00648415	0.00273666	-0.00887591
31.01	0.0514559	0.0371982	0.0163549	0.00962849	0.00117588	0.00183394	0.0011651	-0.00975691
31.21	0.0503077	0.0326944	0.0159049	0.00767554	0.00958176	0.00063653	-0.00096407	-0.00996484
31.41	0.0494668	0.0328502	0.0154776	0.00895649	0.00458865	0.00205466	-0.00087921	-0.0102924
31.61	0.0512741	0.0330654	0.0175651	0.0101363	0.00616468	0.00280756	-0.00022314	-0.00794029
31.81	0.0507836	0.0336478	0.0177145	0.0103628	0.0070831	-0.001791	0.00370523	-0.0109664
32.01	0.045883	0.0324776	0.0124793	0.0096641	0.00202192	-0.00307365	0.00281768	-0.0128145
32.21	0.0493831	0.0298351	0.0133241	0.00841659	0.00264636	0.00420106	-0.00086762	-0.0133272
32.41	0.0512102	0.0367874	0.0171489	0.0120067	0.00473899	0.00166631	0.00064945	-0.00990533
32.61	0.0447833	0.0324554	0.0223685	0.00998896	0.00633847	0.00081423	0.00344254	-0.00898302
32.81	0.0469587	0.0305885	0.0170773	0.00913563	0.00903259	0.00077673	0.0042306	-0.00794318
33.01	0.0478403	0.0307272	0.0166187	0.0105738	0.00748897	0.00018866	0.00288868	-0.00806656
33.21	0.0480221	0.0322183	0.0138754	0.00800912	0.00285725	-0.00197047	-0.00293252	-0.0115646
33.41	0.0482621	0.0317057	0.0144072	0.00805783	0.0057342	-0.0026797	-0.00169211	-0.0100442
33.61	0.0510055	0.0315175	0.0174674	0.0104981	0.00401909	0.0014433	0.00063289	-0.00944127
33.81	0.0483173	0.0329554	0.0134039	0.00524413	0.00356071	-0.00314114	-0.00108694	-0.00858885
34.01	0.0502551	0.0313462	0.0140179	0.0093739	0.00327639	0.00283645	0.00257579	-0.0123399
34.21	0.0487883	0.0345009	0.0154632	0.0107461	0.0048348	0.00057256	0.00192801	-0.01104
34.41	0.0503794	0.0291794	0.0164983	0.00930921	0.00444103	0.00392765	-0.00060021	-0.0132623
34.61	0.045595	0.0315521	0.016635	0.00718092	0.00412475	0.0001221	0.00039978	-0.0105141
34.81	0.050435	0.0325173	0.017425	0.0111522	0.00468491	-0.00132218	0.00027986	-0.00724125
35.01	0.0476684	0.0314324	0.0138648	0.00633402	0.00368479	0.00380449	0.00061865	-0.0117887
35.21	0.0484975	0.0334704	0.0158214	0.00999007	0.00527893	0.00631613	-0.00085454	-0.0106449
35.41	0.0526482	0.0300384	0.0156548	0.00815825	0.00253624	0.00149565	0.00299934	-0.00760914
35.61	0.0447214	0.0297694	0.0142138	0.00836158	0.00073454	0.00069385	0.00072761	-0.0113129
35.81	0.0470286	0.0335962	0.0165776	0.0105347	0.00336252	0.00528946	0.00191285	-0.0146959
36.01	0.048038	0.0330619	0.0146733	0.0103331	0.00066138	0.00220123	0.001098	-0.012496
36.21	0.0470983	0.0309621	0.0139925	0.00844914	0.00492009	0.00104108	-0.00233613	-0.00820468
36.41	0.0480684	0.0296244	0.0160299	0.00719233	0.00404013	-5.044e-05	-0.00021808	-0.0106856
36.61	0.0478225	0.0300842	0.0158815	0.00868449	0.00556056	-0.0027135	0.00205762	-0.0156991
36.81	0.050352	0.0338372	0.0141184	0.00543082	0.00584557	0.00063558	-0.00156458	-0.0113239
37.01	0.0484633	0.0326431	0.0143799	0.00725781	0.00278382	0.00622514	0.00185664	-0.0136558
37.21	0.0469935	0.0326167	0.0137388	0.0106268	0.00425322	0.00421593	0.00217464	-0.0117074
37.41	0.0491316	0.0304944	0.0117478	0.0081139	0.0049872	0.00275212	0.00075024	-0.0114026
37.61	0.0504539	0.0341446	0.0155445	0.00770945	0.00391826	0.00134563	0.00338853	-0.0151985
37.81	0.0502228	0.03152	0.0141722	0.00818456	0.00028411	0.0013723	0.00024633	-0.0129925
38.01	0.050285	0.0363718	0.0119632	0.0101854	0.00370376	-0.00208715	-0.0004894	-0.013692
38.21	0.0449906	0.0304586	0.0186095	0.00823807	0.00273787	-0.00082007	-0.00414185	-0.013497
38.41	0.0476999	0.0292833	0.0159057	0.0114933	0.00737468	0.00143122	-0.00077321	-0.0134345
38.61	0.0461305	0.030271	0.0146573	0.0076214	0.00643254	0.00209876	0.00037247	-0.0101322
38.81	0.0493146	0.0312592	0.0172545	0.00683939	0.00311152	-0.00033889	-0.00274949	-0.0158094
39.01	0.0510588	0.029038	0.0171194	0.003999	0.00316993	-0.0005538	-0.00063237	-0.0126164
39.21	0.0427491	0.0332467	0.0125277	0.0108478	0.00566231	-6.828e-05	-0.0009443	-0.0129823
39.41	0.0474292	0.0357792	0.0144519	0.00943375	0.00479033	0.00031912	0.00307793	-0.010974
39.61	0.047322	0.0319863	0.0161341	0.00865444	0.00444322	0.00014205	0.00279364	-0.0103998
39.81	0.0445912	0.0324444	0.0167798	0.00833152	0.00337716	0.002176	0.00183171	-0.0139514
40.01	0.0484899	0.0298478	0.0127735	0.00817873	0.00593169	-0.00063786	-0.00389058	-0.0166514
40.21	0.0444149	0.02689	0.0183808	0.00997688	0.00241549	-0.00171373	0.00117738	-0.0104668
40.41	0.0492186	0.0292849	0.0144438	0.0118169	0.0025246	-0.00085745	-0.00399135	-0.0104061
40.61	0.0482839	0.0298425	0.0196012	0.00925978	0.00689986	0.0004941	0.0030922	-0.0131798
40.81	0.0495931	0.0312878	0.0135558	0.00923973	0.00177279	-0.00257971	-0.00279907	-0.00851866
41.01	0.0453473	0.0318061	0.0151016	0.00807113	0.00438597	0.00013354	-0.00323875	-0.0142465
41.21	0.0502137	0.0323297	0.00936303	0.00799568	0.00479901	0.00172294	0.00021278	-0.013639
41.41	0.0480253	0.0328347	0.0137601	0.00873297	0.00476127	7.924e-05	-0.00350486	-0.0136906
41.61	0.0460714	0.0305007	0.0138402	0.00829809	0.00449275	0.00108126	0.00133975	-0.0086343
41.81	0.0441746	0.0317392	0.0146387	0.0126413	0.00315323	-0.00069395	-0.0003183	-0.0117118
42.01	0.0444203	0.030813	0.016273	0.00905765	0.00191991	-0.00096698	-0.0020058	-0.0146402
42.21	0.0456435	0.0288347	0.0122468	0.00826009	0.00447181	0.00350519	-0.00030612	-0.0111928
42.41	0.0489588	0.033233	0.0101013	0.0090743	0.00763366	-0.00106842	0.00185227	-0.0120943
42.61	0.0473621	0.0320267	0.0153034	0.0111952	0.00220119	0.00281337	-0.00105487	-0.0116822
42.81	0.0513361	0.0295192	0.0141307	0.00520531	0.00175717	0.00095085	-0.00371909	-0.0117372
43.01	0.0495881	0.0289053	0.0167853	0.0116533	0.00297436	0.00148616	-0.0003579	-0.0126062
43.21	0.0472971	0.0330465	0.0123692	0.00831725	0.00378938	-0.0009536	0.00059418	-0.011733
43.41	0.0464881	0.0305188	0.011549	0.0102491	0.00330219	0.00093017	0.0002166	-0.0125897
43.61	0.04534	0.0331086	0.0138123	0.00714343	0.00365435	0.00456032	0.00016816	-0.012701
43.81	0.0456655	0.031174	0.012491	0.00913762	0.00407891	-0.00170639	0.00030287	-0.0160361
44.01	0.0490358	0.0311784	0.0125155	0.00801421	0.00208218	0.00337741	0.00062073	-0.0112851
44.21	0.0447981	0.0277175	0.0133936	0.011838	-0.00045201	0.00226684	0.00141928	-0.00863223
44.41	0.0477016	0.0288597	0.0131452	0.0115702	0.00513869	9.863e-05	0.00311347	-0.01426
44.61	0.0454149	0.0269203	0.0130475	0.00937644	0.0032644	0.00151186	0.00119229	-0.0120523
44.81	0.0491491	0.0332855	0.014634	0.0101907	0.00340294	0.00171998	-0.00051419	-0.0125315
45.01	0.0473159	0.0329406	0.0178872	0.00976992	0.00457149	-0.00025323	0.00079987	-0.0140744
45.21	0.0473208	0.0326852	0.0107411	0.0079658	0.00256369	0.00143513	0.00021131	-0.0143756
45.41	0.0475899	0.0276131	0.0139115	0.00887787	0.00192665	0.00123131	-0.00303299	-0.0135758
45.61	0.0454587	0.0310385	0.0114928	0.00568458	0.00408739	0.00033381	-0.00372101	-0.0130234
45.81	0.047089	0.0289008	0.0134393	0.0086837	0.00516156	-0.00016248	-0.00170334	-0.0115982
46.01	0.0435738	0.0290429	0.0117193	0.0049929	0.00490992	0.00129655	-0.00461219	-0.0128611
46.21	0.0466151	0.031022	0.0148778	0.0087611	0.00108071	0.0032711	0.00319084	-0.013051
46.41	0.0454292	0.0348836	0.013465	0.0108149	0.00019909	0.00237494	-0.00275033	-0.0116213
46.61	0.052025	0.0340363	0.0150595	0.00833862	0.00141282	-0.00138488	-0.00251321	-0.0156754
46.81	0.0440103	0.0336633	0.0172723	0.00440125	0.00171096	0.00204985	-0.00121519	-0.0115293
47.01	0.0442944	0.0331121	0.0169323	0.00933164	0.00088822	-0.00065783	-0.00156461	-0.0180996
47.21	0.0492015	0.0355172	0.0118853	0.0079436	0.00541225	0.00250029	-0.00151905	-0.0153538
47.41	0.045551	0.030071	0.0142111	0.00677181	0.00185731	-0.00031298	0.00287133	-0.0164325
47.61	0.0457699	0.0302766	0.0121494	0.0113669	0.00268799	6.881e-05	-0.00249122	-0.0105156
47.81	0.0458713	0.0328488	0.0111729	0.0106762	0.00113357	-0.00078852	0.00133907	-0.0129794
48.01	0.0464519	0.0316145	0.0152654	0.00942929	8.762e-05	-0.00111365	-0.00059107	-0.0125815
48.21	0.0432745	0.0323571	0.0179687	0.00824916	0.00057911	0.00241771	0.00037886	-0.0102766
48.41	0.0521664	0.0291448	0.0136581	0.00824384	0.00627384	-0.00049337	-0.00208823	-0.0133099
48.61	0.0488922	0.0321216	0.0192141	0.0105025	0.00387271	0.00150139	-0.00197813	-0.0124787
48.81	0.0465693	0.0328122	0.0165197	0.013688	0.00403084	-0.00213005	7.188e-05	-0.0110047
49.01	0.0456254	0.0294159	0.0109377	0.00884124	0.00213687	0.00231609	0.00032478	-0.010197
49.21	0.0462919	0.0290535	0.0120855	0.00673669	-0.00012304	-0.00063804	-0.00034861	-0.0141671
49.41	0.0456301	0.0292105	0.0103279	0.00722432	0.00689809	0.00044068	0.00017829	-0.0119816
49.61	0.0475338	0.028964	0.0160486	0.00745436	0.00018095	0.00222688	-0.00414163	-0.0154452
49.81	0.0447487	0.0300677	0.0178545	0.00945285	0.00125541	0.00330389	-0.00042656	-0.0117925
50.01	0.0465956	0.0300377	0.0144528	0.0117024	0.00371793	-0.00150403	-0.00185994	-0.0139345

[truncated: 3 more sheets: ABI1-LPP Diss Curve rep 2, PCARE-dual Diss curve rep 1, PCARE-dual Diss curve rep 2]
