# Supplementary material for: A distributed residue network permits conformational binding specificity in a conserved family of actin remodelers
Source: eLife journal article supplement (doi:10.7554/elife.70601), 2021-11-08
Supplement: supp1 [file elife-70601-supp1-v1.pdf]

**Protein sequences for *A distributed residue network permits conformational binding specificity in a conserved family of actin remodelers***

Constructs below were cloned into a pMCSG7 backbone (gift from F. Gertler) which encodes an N-terminal 6xHis-TEV site. Amino acid sequences of proteins are as given:

**ENAH EVH1**

MHHHHHHSSGVDLGTENLYFQSNAMSEQSICQARAAMVYDDANKKWVPAGGSTGF  
SRVHIYHHTGNNTFRVVGRIQDHQVINCALPKGLKYNQATQTFHQWRDARQVYGLN  
FGSKEDANVFASAMMHALEVL\*

**VASP EVH1**

MHHHHHHSSGVDLGTENLYFQSNAMSETVICSSRATVMLYDDGNKRWLPAGTGPQA  
FSRVQIYHNPTANSFRVVGKMQPDQQVINCALVIRGVKYNQATPNFHQWRDARQV  
WGLNFGSKEDAAQFAAGMASALEALE\*

**EVL EVH1**

MHHHHHHSSGVDLGTENLYFQSNAMSEQSICQARASVMVYDDTSKKWVPIKPGQQG  
FSRINIYHNTASSTFRVVGKLDQDQVINYIVKGLKYNQATPTFHQWRDARQVYGL  
NFASKEEATTFSNAMLFALNIMNSQE\*

**EVL EVH1 V65P#**

MHHHHHHSSGVDLGTENLYFQSNAMSEQSICQARASVMVYDDTSKKWVPIPGQQGF  
SRINIYHNTASNTFRVVGKLDQDQVINYISIPKGLKYNQATPTFHQWRDARQVYGLN  
FASKEEATTFSNAMLFALNIM\*

**EVL EVH1 V65P Y62C#**

MHHHHHHSSGVDLGTENLYFQSNAMSEQSICQARASVMVYDDTSKKWVPIPGQQGF  
SRINIYHNTASNTFRVVGKLDQDQVINCISIPKGLKYNQATPTFHQWRDARQVYGLN  
FASKEEATTFSNAMLFALNIM\*

**EVL EVH1 swapped (7-residue swapped)#**

MHHHHHHSSGVDLGTENLYFQSNAMSEQSICQARASVMVYDDTSKKWVPAGGQQG  
FSRINIYHNTASNTFRVVGKLDQDQVINCISIPKGLKYNQATPTFHQWRDARQVYGL  
NFASKEEATTFANAMLFALILEIL\*

**ENAH EVH1-PCARE (for crystallography)**

MHHHHHHSSGVDLGTENLYFQSNAMSEQSICQARAAMVYDDANKKWVPAGGSTGF  
SRVHIYHHTGNNTFRVVGRIQDHQVINCALPKGLKYNQATQTFHQWRDARQVYGLN  
FGSKEDANVFASAMMHALEVLGGSGSAAKSEELSCEMEGNLEHLPPPPMEVLMDK  
SFASLES\*

**SUMO-ActA**

MAGGLNDIFEAQKIEWHEDTGGSSHHHHHHGSGSGSDSEVNQEAKPEVKPEVKPET  
HINLKVSDGSSEIFFKIKKTTPLRRLMEAFKRQKEMDSLTFLYDGIEIQADQTPEDLD  
MEDNDIIEAHREQIGGGFNAPATSEPSSFEPPTTEDELEIIRETASSLDS\*

**SUMO-PCARE B**

MAGGLNDIFEAQKIEWHEDTGGSSHHHHHHGSGSGSDSEVNQEAKPEVKPEVKPET  
HINLKVSDGSSEIFFKIKKTTPLRRLMEAFKRQKEMDSLTFLYDGIEIQADQTPEDLD  
MEDNDIIEAHREQIGGSGSGNLEHLPPPPMEVLMDKSFASLES

# These EVL constructs had a single-residue deletion of WT EVL residue Lys 27, which was removed to make the lengths of ENAH EVH1 and the mutated EVL EVH1 domains

equal. In PDB structure 1QC6, Lys27 is at the end of a loop that is disordered and has a high B-factor.

Constructs below were cloned into a pCIB lentiviral expression vector for use in mammalian cell culture.

**Mito-6xHis-mRuby2-PCAREB**

MVGRNSAIAAGVCGALFIGYCIYFDRKRRSDPNFKSRMSRATMHHHHHHMVSKGEELI  
KENMRMKVVMEGSVNGHQFKCTGEGEGNPYMGQTQTMRIKVIEGGPLPFAFDILATSF  
MYGSRTFIKYPKGIPDFFKQSFPEGFTWERVTRYEDGGVVTVMQDTSLEDGCLVYHV  
QVRGVNFPSNGPVMQKKTGWEPNTEMMYPADGGGLRGYTHMALKVDGGGHLSCSF  
VTTYRSKKTVGNIKMPGIHAVDHRLERLEESDNEMFVVQREHAVAKFAGLGGGMDEL  
YKSGLRSQASAVDGTAGEMEGNLEHLPPPPMEVLMDKSFASLES\*

**6xHis-mRuby2-PCAREB**

MHHHHHHMVSKGEELIKENMRMKVVMEGSVNGHQFKCTGEGEGNPYMGQTQTMRIK  
VIEGGPLPFAFDILATSFMYGSRTFIKYPKGIPDFFKQSFPEGFTWERVTRYEDGGVVT  
VMQDTSLEDGCLVYHVQVRGVNFPSNGPVMQKKTGWEPNTEMMYPADGGGLRGYT  
HMALKVDGGGHLSCSFVTTYRSKKTVGNIKMPGIHAVDHRLERLEESDNEMFVVQRE  
HAVAKFAGLGGGMDELYKSGLRSQASAVDGTAGEMEGNLEHLPPPPMEVLMDKSFA  
SLES\*
