# Supplementary material for: A distributed residue network permits conformational binding specificity in a conserved family of actin remodelers
Source: eLife. 2021 Dec 2;10:e70601. doi: 10.7554/eLife.70601 (PMC8639148; doi:10.7554/eLife.70601)
Supplement: Table 1—source data 1. [file elife-70601-table1-data1.xlsx]

## Sheet: Read me
Raw data for Table 1 of A distributed residue network permits conformational binding specificity in a conserved family of actin remodelers
Affinity of EVL and ENAH EVH1 domain mutants for peptides ActA and PCARE B.
Two separate BLI experiments were performed, and steady state analysis was performed for each curve at a given concentration of EVH1 to obtain values to fit a one-site specific binding model in Prism to obtain KD values.
Steady state values are reported as the wavelength shift (response, nm) of the BLI experiment. Data in Table 1 are reported as the average KD value and standard deviation.

## Sheet: Table 1
Raw Data for EVL EVH1 WT and ENAH WT against PCARE B provided in Source Data - Figure 1
	EVL V65P
	PCARE B			ActA
Concentration (μM)	Rep 1	Rep 2	Con (μM)	Rep 1	Rep 2
160	0.219	0.2174	80	0.3009	0.3055
80	0.1494	0.1493	60	0.2864	0.2912
40	0.09736	0.09462	30	0.2688	0.2744
20	0.05214	0.06106	15	0.2462	0.2571
10	0.03137	0.03409	7.5	0.2204	0.2219
5	0.0205	0.02165	3.75	0.18	0.1864
2.5	0.01159	0.01247	1.875	0.1344	0.1399
0	0	0	0	0	0
	EVL V65P Y62C
	PCARE B		ActA
Concentration (μM)	Rep 1	Rep 2	Rep 1	Rep 2
80	0.336	0.345	0.317	0.2787
60	0.3348	0.3298	0.2878	0.2669
30	0.3168	0.3191	0.2586	0.241
15	0.2985	0.2953	0.2187	0.2105
7.5	0.2661	0.2625	0.169	0.1716
3.75	0.2247	0.219	0.1256	0.1253
1.875	0.162	0.1574	0.08231	0.08012
0	0	0	0	0
	EVL Y62C
	PCARE B		ActA
Concentration (μM)	Rep 1	Rep 2	Rep 1	Rep 2
80	0.309857	0.322606	0.276627	0.291174
60	0.290674	0.303726	0.268259	0.282795
30	0.228727	0.244468	0.236069	0.248417
15	0.164732	0.178171	0.195882	0.208377
7.5	0.103561	0.120025	0.148561	0.163464
3.75	0.058934	0.074371	0.102544	0.116328
1.875	0.03062	0.045345	0.0615	0.074602
0	0	0	0	0
	ENAH P65D
	PCARE B		ActA
Concentration (μM)	Rep 1	Rep 2	Rep 1	Rep 2
80	0.256958	0.264507	0.323407	0.30286
60	0.232262	0.239766	0.31072	0.291909
30	0.170582	0.17573	0.275925	0.258219
15	0.112641	0.117426	0.229102	0.214182
7.5	0.066276	0.075447	0.173527	0.167958
3.75	0.036198	0.044794	0.120889	0.117165
1.875	0.016065	0.028598	0.071246	0.076018
0	0	0	0	0
	ENAH WT
	ActA
Concentration (μM)	Rep 1	Rep 2
80	0.438	0.4061
53.33	0.4294	0.3833
35.56	0.3964	0.3627
23.7	0.3709	0.3414
15.8	0.336	0.3101
10.53	0.301	0.2721
7.022	0.2602	0.2352
4.68	0.224	0.2037
3.12	0.1801	0.1514
2.08	0.141	0.1276
1.39	0.1029	0.09511
0	0	0
